# Supplementary material for: An overlooked oxidation mechanism of toluene: computational predictions and experimental validations
Source: Royal Society of Chemistry journal article supplement (doi:10.1039/d3sc03638c), 2023-01-01
Supplement: d3sc03638c1.pdf [file d3sc03638c1.pdf]

## Supporting Information

---

### Overlooked Oxidation Mechanism of Toluene: Computational Predictions and Experimental Validations

Zihao Fu<sup>1#</sup>, Fangfang Ma<sup>1#</sup>, Yuliang Liu<sup>2</sup>, Chao Yan<sup>2</sup>, Dandan Huang<sup>3</sup>, Jingwen Chen<sup>1</sup>, Jonas Elm<sup>4</sup>, Yuanyuan Li<sup>2</sup>, Aijun Ding<sup>2</sup>, Lukas Pichelstorfer<sup>5,6</sup>, Hong-Bin Xie<sup>1\*</sup>, Wei Nie<sup>2\*</sup>, Joseph S. Francisco<sup>7\*</sup>, Putian Zhou<sup>5\*</sup>

<sup>1</sup>Key Laboratory of Industrial Ecology and Environmental Engineering (Ministry of Education), School of Environmental Science and Technology, Dalian University of Technology, Dalian 116024, China

<sup>2</sup>Joint International Research Laboratory of Atmospheric and Earth System Sciences, School of Atmospheric Sciences, Nanjing University, Nanjing 210023, China

<sup>3</sup>State Environmental Protection Key Laboratory of Formation and Prevention of Urban Air Pollution Complex, Shanghai Academy of Environmental Sciences, Shanghai, China

<sup>4</sup>Department of Chemistry, iClimate, Aarhus University, Langelandsgade 140, DK-8000 Aarhus C, Denmark

<sup>5</sup>Institute for Atmospheric and Earth System Research/Physics, Faculty of Science, University of Helsinki, P. O. Box 64, FIN-00014 Helsinki, Finland

<sup>6</sup>pi-nerics, Wallbachsiedlung 28, 5202 Neumarkt am W., Austria

<sup>7</sup>Department of Earth and Environmental Science, University of Pennsylvania, Philadelphia, PA, USA 19104-6316

#Z.H.F. and F.F.M. contributed equally.

\*Corresponding e-mail: hbxie@dlut.edu.cn; niewei@nju.edu.cn; frjoseph@sas.upenn.edu; putian.zhou@helsinki.fi

*Totally, 23 pages, 10 figures, 3 tables*

## Supporting Information

---

### Contents

|                                                                                               |     |
|-----------------------------------------------------------------------------------------------|-----|
| Computational details for fractional yields calculation .....                                 | S3  |
| Box Modeling. ....                                                                            | S3  |
| Comparison of the formation of $P_{\text{TH-1-1-2}}$ and $\text{IM}_{\text{TH-1-1-1}}$ . .... | S10 |
| Discussion about the energies of RCs and TSs .....                                            | S11 |
| Table S2 .....                                                                                | S12 |
| Table S3 .....                                                                                | S12 |
| Figure S1.....                                                                                | S13 |
| Figure S2.....                                                                                | S14 |
| Figure S3.....                                                                                | S15 |
| Figure S4.....                                                                                | S16 |
| Figure S5.....                                                                                | S18 |
| Figure S6.....                                                                                | S18 |
| Figure S7.....                                                                                | S19 |
| Figure S8.....                                                                                | S20 |
| Figure S9.....                                                                                | S21 |
| Figure S10.....                                                                               | S22 |
| References.....                                                                               | S23 |

## Supporting Information

---

### Computational details for fractional yields calculation

The master equation (ME) approach was used for describing the nonequilibrium kinetics involving various reaction complexes (wells) on the potential energy surfaces (PES). The ME approach has been discussed in previous studies,<sup>1</sup> and only a brief presentation is given here. Briefly, the population distribution for the reactants and intermediate on the PES is calculated as a function of time by solving a set of differential equations that describe collisional energy transfer within species and interconversion between species. The general form of the ME used in this study is

$$\frac{d}{dt}\mathbf{p} = \mathbf{M}\mathbf{p}$$

where  $\mathbf{p}$  is a vector, describing the time evolution populations, and  $\mathbf{M}$  is a collision matrix that describes the rate of population transfer due to collisional energy transfer and reaction. In solving the master equation, a matrix describing the population evolution within and between potential energy wells was diagonalized, yielding a set of eigenvalues.

### Box Modeling.

#### 1. All considered reaction pathways for toluene oxidation.

The original mechanism (denoted by “Ro”) here refers to the chemistry scheme directly generated by MCM v3.3.1.<sup>2</sup> In this mechanism, toluene is oxidized by  $\cdot\text{OH}$  to produce TLBIPEROOH and TLBIPERNO<sub>3</sub> after several steps, which can be further oxidized by  $\cdot\text{OH}$  as shown below:

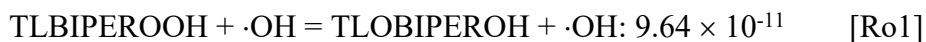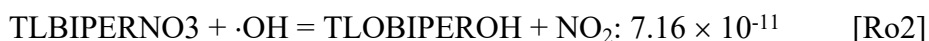

In the new mechanism (denoted by “Rn”), a new oxidation pathway has been proposed in this study. And the above two reactions are replaced by the following reactions:

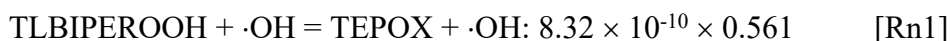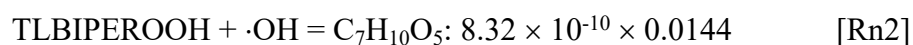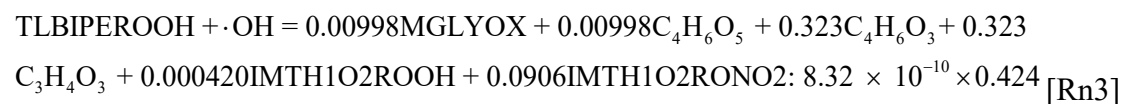

## Supporting Information

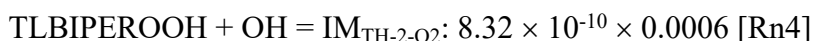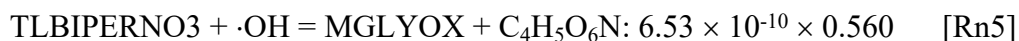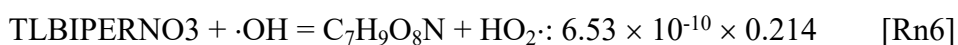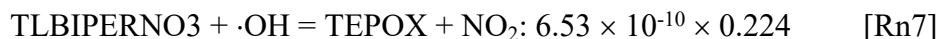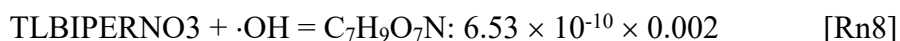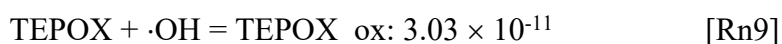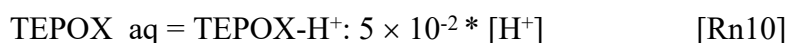

The numbers at the end of equations are the reaction rate coefficients ( $\text{cm}^3 \text{molecule}^{-1} \text{s}^{-1}$  or  $\text{s}^{-1}$ ) and each reaction is tagged with an index. The reaction rate of Rn9 was calculated with chemical quantum method. For aqueous reactions of TEPOX (Rn10), the aqueous second-order reaction rate constant value  $5 \times 10^{-2} \text{M}^{-1} \text{s}^{-1}$  from corresponding IEPOX reaction<sup>3</sup> was employed, due to their similar structures and aqueous reaction mechanism (see Figure S9 and Reference 4). The reaction rate of TEPOX changes with pH value as shown in Rn10. In addition, pH has a possibility to affect the second-order rate constants by changing the distribution of different forms. According to the calculated forms of TEPOX as a function of pH (see Figure S8), the TEPOX remains in neutral form at the typical aerosol pH ranges (1-5). Therefore, the effect of pH on the aqueous second-order reaction rate constant could be negligible. The properties, including the chemical formula, molar mass and saturation vapor pressure (SVP), of the newly added species are shown in Table M\_SVP (see details in spreadsheet). In addition, the aqueous phase reaction of TEPOX is also included (Rn10), where TEPOX\_aq means TEPOX condensed in the particle aqueous phase. For the aqueous phase reaction of TEPOX, the reaction rate coefficient ( $\text{s}^{-1}$ ) is dependent on the molarity of hydrogen ion  $[\text{H}^+]$  ( $\text{mol L}^{-1}$ ), which can be calculated from the pH value:

$$[\text{H}^+] = 10^{(-\text{pH})}$$

where pH (dimensionless) value is an input in the simulations.

## 2. Model setup

## Supporting Information

---

In order to evaluate the impacts of different factors on the SOA formation, various simulation cases were conducted. The environment parameters, including air temperature, air pressure, relative humidity (RH) and actinic fluxes, are the same for all the simulation cases. Among them, the air temperature, air pressure and RH are set as constants, which is 300 K, 1 atm ( $1.01325 \times 10^5$  Pa) and 70%, respectively. In current model, RH only affects the number concentration of water vapor ( $\text{H}_2\text{O}$ ). The actinic fluxes were derived from the Table 3.7 in Finlayson-Pitts and Pitts,<sup>3</sup> which reflected a diurnal cycle at the Earth's surface according to the changing of solar zenith angle. All the simulations were conducted for two days with a time step of 5 seconds.

In the base case, typical values and default configuration were applied as a control run, which shows a typical summertime urban environment. For example, the mixing ratios of molecular hydrogen ( $\text{H}_2$ ), ozone ( $\text{O}_3$ ), nitric oxide (NO), nitrogen dioxide ( $\text{NO}_2$ ), sulfur dioxide ( $\text{SO}_2$ ), carbon monoxide (CO), nitrous acid (HONO), methane ( $\text{CH}_4$ ) and toluene are set to 600 parts per billion in volume (ppbv), 60 ppbv, 0.1 ppbv, 1 ppbv, 6 ppbv, 1300 ppbv, 1 ppbv, 2000 ppbv and 5 ppbv, respectively (Table M\_SIM, see details in spreadsheet). Their mixing ratios are kept constant as the input in the calculation of chemistry scheme. Considering the computation efficiency, not all the organic compounds are considered to be condensable, only the ones whose SVP under a threshold are assumed to condense. In the base case, the threshold of SVP is  $1.0 \times 10^{-7}$  atm, namely about 0.01 Pa.

### 3. Analysis of sensitivity simulations

Based on different chemistry schemes, we conducted five sets of sensitivity simulations:

- (1). Set base: Original mechanism (prefixed by base)
- (2). Set new: New mechanism without considering the oxidation of TEPOX and its aqueous phase reaction, namely, excluding Rn9 and Rn10 reactions (prefixed by new)
- (3). Set new\_aq: New mechanism without considering the oxidation of TEPOX, namely, excluding Rn9 reaction (prefixed by new\_aq)

## Supporting Information

---

(4). Set new\_ox: New mechanism without considering the aqueous phase reaction of TEPOX, namely, excluding Rn10 reaction (prefixed by new\_ox)

(5). Set new\_ox\_aq: Full new mechanism (prefixed by new\_ox\_aq)

In each set of sensitivity simulation, several input parameters or configurations have been altered to evaluate their individual impacts on simulation results, especially on the SOA mass yield ( $Y_{\text{mass}}$ ). For example, the mixing ratios of NO<sub>2</sub>, SO<sub>2</sub>, HONO and toluene are in the range of 2 ppbv - 50 ppbv, 3 ppbv - 20 ppbv, 0.3 ppbv - 5 ppbv and 0.5 ppbv - 10 ppbv, respectively. It should keep in mind that the mixing ratio of NO is always kept as one tenth of NO<sub>2</sub>. The SVP threshold for condensable vapors varied from  $1.0 \times 10^{-6}$  atm to  $1.0 \times 10^{-10}$  atm, and pH value in the simulations with aqueous reaction varied from 1 to 5. Furthermore, some special cases are also included. For example, in the 'TOLUENE\_V5' cases, the mixing ratio of toluene starts at 5 ppbv and then reacts over time rather than keeping constant. In the 'SVP\_EPI' cases, the SVP values of newly added species in the new mechanism are calculated by the EPI suite software, while in other cases, their SVP values are calculated by the SIMPOL method. In the 'TH\_Hn' cases, the SVP value of TEPOX-H<sup>+</sup> is set to several orders (indicated by the number n) lower than that of TEPOX instead of  $10^{-20}$  atm (Table M\_SVP). Different configurations can also be combined, e.g., the case 'new\_ox\_aq\_pH2\_NO2\_H50' means full new mechanism with pH of 2 and NO<sub>2</sub> mixing ratio of 50 ppbv. All the detailed setup of the simulations is shown in SI-Table\_M\_SVP\_and\_Table\_M\_SIM. The impact of individual parameters on  $Y_{\text{mass}}$  are discussed in following part.

### 3.1 NO<sub>x</sub>

The simulations with varying NO<sub>x</sub> (NO + NO<sub>2</sub>) mixing ratios show that  $Y_{\text{mass}}$  decreases as NO<sub>x</sub> mixing ratio increases, but the reasons for original and new mechanisms are slightly different. In the original mechanism, MNCATECOOH and MNNCATCOOH contribute about 98% together to  $Y_{\text{mass}}$  at the end of the simulation in the base case and all the NO<sub>x</sub> varying cases (Figure S10a). Both MNCATECOOH and MNNCATCOOH have very low volatilities with  $10^{-8.7}$  Pa for MNCATECOOH and  $10^{-$

## Supporting Information

<sup>8,9</sup> Pa for MNNCATCOOH at 298.15 K (Table M\_SVP). As NO<sub>x</sub> mixing ratio increases, the contribution of MNNCATCOOH increases from 46.9% in the base case (NO<sub>2</sub> mixing ratio is 1 ppbv) to 83.1% in the NO<sub>2</sub>\_H50 case (NO<sub>2</sub> mixing ratio is 50 ppbv).

From the following reactions, we can find that the MNCATECH is a common precursor (Ro3 and Ro4 reactions). Increasing the mixing ratio of NO<sub>x</sub> will produce more MNCATECO and MNNCATECO whose SVP are 10<sup>-4.1</sup> Pa and 10<sup>-4.5</sup> Pa, respectively (Ro5~Ro8 reactions). In addition, as the NO<sub>x</sub> mixing ratio increases, the concentration of HO<sub>2</sub> will decrease, e.g., the HO<sub>2</sub> number concentration is about two orders of magnitude lower in NO<sub>2</sub>\_H50 case than that in the base case. Furthermore, the Ro3 and Ro4 reactions have also explained the increasing contribution of MNNCATCOOH as NO<sub>x</sub> mixing ratio increases.

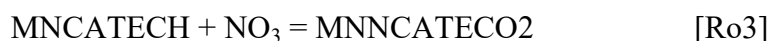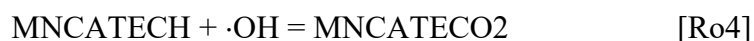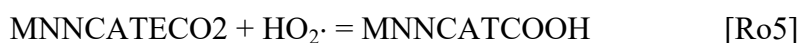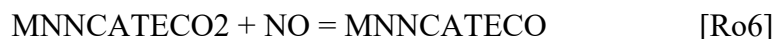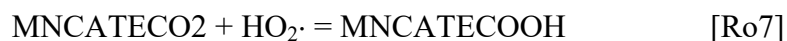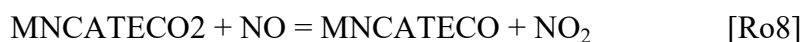

In the new mechanism, MNCATECOOH and MMNCATCOOH, together with several new compounds including TEPOX, IMTH1O2RONO2, C<sub>7</sub>H<sub>9</sub>O<sub>8</sub>N and C<sub>7</sub>H<sub>10</sub>O<sub>5</sub> contribute around 90% to Y<sub>mass</sub> in both new and new\_ox cases (Figure S10b and c). However, when NO<sub>x</sub> mixing ratio increases, C<sub>7</sub>H<sub>9</sub>O<sub>8</sub>N becomes dominant and contributes more than 90% to Y<sub>mass</sub> when NO<sub>2</sub> mixing ratio is larger than 20 ppbv in both new and new\_ox cases (Figure S10b and c). The reason is that under high NO<sub>x</sub> concentration, TLBIPERNO3 is produced much more than TLBIPEROOH, which results in higher yield of C<sub>7</sub>H<sub>9</sub>O<sub>8</sub>N and lower yield of other condensable vapors mentioned above (see reactions Rn1 to Rn8). And compared to other dominant condensable vapors, e.g., MNCATECOOH, MMNCATCOOH, TEPOX and IMTH1O2RONO2, C<sub>7</sub>H<sub>9</sub>O<sub>8</sub>N has higher volatility of 10<sup>-5.2</sup> Pa. Therefore, Y<sub>mass</sub> also

## Supporting Information

---

decreases with the increasing of  $\text{NO}_x$  mixing ratio in the new mechanism. The explanations also apply similarly in the new\_aq and new\_ox\_aq cases (Figure S10d and e).

### 3.2 $\text{SO}_2$ , HONO and toluene

In all the  $\text{SO}_2$  cases except in the new\_ox\_aq case set,  $Y_{\text{mass}}$  only decreases less than 1% when  $\text{SO}_2$  mixing ratio increases from 3 ppbv to 20 ppbv within each set of simulations (Table M\_SIM). The inverse relationship results from the competition of  $\text{SO}_2$  for  $\cdot\text{OH}$ , which causes a slight decrease production of condensable vapors. In the new\_ox\_aq case set, the decrease of OH could also increase the amount of TEPOX\_aq which increases the  $Y_{\text{mass}}$  from TEPOX, so the  $Y_{\text{mass}}$  is lower (less than 1%) in the case new\_ox\_aq compared to new\_ox\_aq\_SO2\_L3 and new\_ox\_aq\_SO2\_H20. In contrary, the increasing HONO mixing ratio will increase  $\cdot\text{OH}$  concentration, resulting in higher  $Y_{\text{mass}}$  (Table M\_SIM). For example, the  $\cdot\text{OH}$  concentration is about twice in the HONO\_H5 case in the middle of the second day as that in the base case, causing about 85% increase of  $Y_{\text{mass}}$ . The results are similar in the new and new\_aq sets. In the new\_ox and new\_ox\_aq sets, the increasing ratio of  $\cdot\text{OH}$  concentration in HONO\_H5 case is the same but the increasing ratio of  $Y_{\text{mass}}$  is lower, which is about 53%. This is due to the  $\cdot\text{OH}$  oxidation of TEPOX (Rn9 reaction) which consumes  $\cdot\text{OH}$  but does not produce condensable vapors.

In the base set,  $Y_{\text{mass}}$  is lower when the toluene mixing ratio is higher, because the production of condensable vapors is smaller than the additionally reacted toluene. In the TOLUENE\_V5 case, the toluene is consumed and thus the reacted toluene is lower than the base case, which results in a higher  $Y_{\text{mass}}$  (Table M\_SIM). While in the new and new\_aq sets,  $Y_{\text{mass}}$  is larger at higher toluene mixing ratios due to the increased production of TEPOX (Figure S10b and d). Therefore,  $Y_{\text{mass}}$  in the TOLUENE\_V5 is lower than the standard cases new and new\_aq. In the new\_ox and new\_ox\_aq sets, the situation is more complicated because the additionally produced TEPOX is not only condensing but only oxidized by  $\cdot\text{OH}$  at higher toluene mixing ratios. So these two compensated effects result in decreasing of  $Y_{\text{mass}}$  when toluene mixing ratio is



## Supporting Information

---

increasing. Otherwise, the relationship between  $Y_{\text{mass}}$  and toluene mixing ratio is similar with the base set (Figure S10c and e).

### 3.3 SVP

Considering the computation efficiency, not all the species are considered as condensable vapors although some of them may also condense under certain conditions. In the sensitivity simulations, different SVP thresholds are tested to evaluate the impact of the threshold choice. It should be noted that the lower the SVP threshold is, the less condensable species are included in the condensable vapor list (Table M\_SVP). The results show that when the threshold of SVP is set to  $1 \times 10^{-10}$  atm,  $Y_{\text{mass}}$  decreases dramatically since only a few species are condensing. However, the difference between  $1 \times 10^{-7}$  atm and  $1 \times 10^{-6}$  atm is less than 1% for all the sets (Table M\_SIM). So using  $1 \times 10^{-7}$  atm as a standard threshold of SVP is a reasonable choice in this study.

Different methods of calculating SVP values sometimes show large difference for some species. In order to evaluate this uncertainty in the new mechanism, we applied the SVP values calculated by EPI suite software<sup>5</sup> in the SVP\_EPI cases. Table M\_SVP shows that the SVP values calculated from EPI suit are about one order of magnitude higher than that from SIMPOL method<sup>6</sup>. Therefore,  $Y_{\text{mass}}$  is about 40% lower in the new (37.7%) and new\_aq (38.6%) sets, and about 10% lower in the new\_ox (10.1%) and new\_ox\_aq (13.7%) sets. This indicates that the importance of the accurate estimation of the SVP values in calculating the  $Y_{\text{mass}}$ . In the TH\_Hn ( $n = 1, 3, 5$ ) cases, the impact of the SVP value of TEPOXH\_ion has been evaluated for new\_aq and new\_ox\_aq sets. The results show that as long as TEPOXH\_ion has more than one order of magnitude lower of SVP than TEPOX,  $Y_{\text{mass}}$  is not affected (Figure S10d and e).

### 3.4 pH

In the new\_aq and new\_ox\_aq sets with the aqueous phase reaction,  $Y_{\text{mass}}$  shows large increasing when pH decreases (Table M\_SIM). This is also expected since more TEPOX in the aqueous phase are converted to TEPOXH\_ion which is nearly non-volatile, and then the aqueous TEPOX pulls more gaseous TEPOX to the particle phase. Therefore, under low pH conditions, TEPOXH\_ion is a dominant contribution to  $Y_{\text{mass}}$

## Supporting Information

(Figure S10d and e). This indicates that the new mechanism with the aqueous phase reaction can play an important role in the acidic urban environment condition.

### Comparison of the formation of $P_{\text{TH-1-1-2}}$ and $\text{IM}_{\text{TH-1-1-1}}$

As presented in the Figure S2b, the energy barrier of forming  $\text{IM}_{\text{TH-1-1-1}}$  via  $\text{TS}_{\text{TH-1-1-1}}$  ( $8.5 \text{ kcal mol}^{-1}$ ) is lowest among the considered reaction pathways for the reactions of  $\text{IM}_{\text{TH-1-1}}$ . However, the  $\text{IM}_{\text{TH-1-1-1}}$  is thermodynamically unstable with a reversible energy barrier of only  $0.1 \text{ kcal mol}^{-1}$ , and therefore the pathway is reversible. Besides, as a C-centered radical, the  $\text{IM}_{\text{TH-1-1-1}}$  can barrierlessly combine with  $\text{O}_2$  to form peroxy radicals ( $\text{IM}_{\text{TH-1-1-1-RO}_2}$ ). Therefore, pathway involving  $\text{IM}_{\text{TH-1-1-1}}$  can be described as

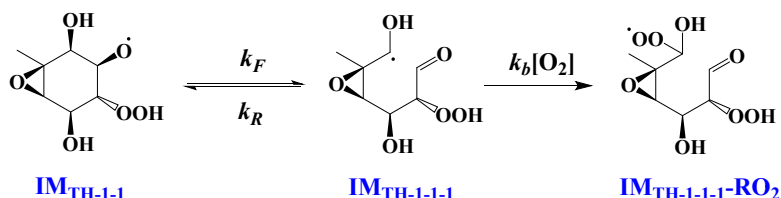

Additionally, we noted that forming  $P_{\text{TH-1-1-2}}$  via  $\text{TS}_{\text{TH-1-1-2}}$  with the energy barrier of  $11.9 \text{ kcal mol}^{-1}$  is the second most favorable and the thermodynamics is favorable. Therefore, it is necessary to compare the reaction rate constants of these two reaction pathways to clearly identify the most feasible pathway. Due to the second-step reactions of  $\text{IM}_{\text{TH-1-1-1}}$ , it is hard to directly compare the reaction rate of forming  $\text{IM}_{\text{TH-1-1-1}}$  and forming  $P_{\text{TH-1-1-2}}$ . Therefore, we calculated the effective rate ( $k_{b,\text{eff}}$ , in  $\text{s}^{-1}$ ) for the formation of  $\text{IM}_{\text{TH-1-1-1-RO}_2}$  as

$$k_{b,\text{eff}} = \frac{k_F k_b [\text{O}_2]}{k_R + k_b [\text{O}_2]}$$

where  $k_F$ ,  $k_R$ , and  $k_b[\text{O}_2]$  are rate constants for the reaction of  $\text{IM}_{\text{TH-1-1}} \rightarrow \text{IM}_{\text{TH-1-1-1}}$ ,  $\text{IM}_{\text{TH-1-1-1}} \rightarrow \text{IM}_{\text{TH-1-1}}$  and  $\text{IM}_{\text{TH-1-1-1}} \rightarrow \text{IM}_{\text{TH-1-1-1-RO}_2}$ , respectively. The  $k_{b,\text{eff}}$  value was estimated to be  $2.1 \times 10^2 \text{ s}^{-1}$  ( $\text{IM}_{\text{TH-1-1}} \rightarrow \text{IM}_{\text{TH-1-1-1-RO}_2}$ ) based on our calculated values for  $k_F$  ( $4.7 \times 10^6 \text{ s}^{-1}$ ) and  $k_R$  ( $1.2 \times 10^{12} \text{ s}^{-1}$ ), and  $k_b = 10^{-11} \text{ cm}^3 \text{ molecule}^{-1} \text{ s}^{-1}$  and  $[\text{O}_2] = 5 \times 10^{18} \text{ molecules cm}^{-3}$ . We found that the  $k_{b,\text{eff}}$  value is much lower than that of forming  $P_{\text{TH-1-1-2}}$  ( $1.4 \times 10^5 \text{ s}^{-1}$ ). Therefore, forming  $P_{\text{TH-1-1-2}}$  is much more favorable than forming  $\text{IM}_{\text{TH-1-1-1}}$  for the reactions of  $\text{IM}_{\text{TH-1-1}}$ .

## Supporting Information

---

### Discussion about the energies of RCs and TSs

As shown in the Figure S2a and 4a, the energies of three RCs ( $RC_{TH-1}$ ,  $RC_{TH-2}$  and  $RC_{TN-2}$ ) are higher than that of the corresponding TSs ( $TS_{TH-1}$ ,  $TS_{TH-2}$  and  $TS_{TN-2}$ ). Therefore, it is interesting to discuss why these apparent anomalies occur. Firstly, we checked the wavefunction stability of these RCs with the keyword ‘stable’ in the optimization process, and found that the wavefunction of three RCs are stable. Secondly, by further analysing the energies of RCs and TSs at the M06-2X/6-31+G(d,p) level of theory, we found that the energies of RCs ( $RC_{TH-1}$  -6.00 kcal mol<sup>-1</sup>,  $RC_{TH-2}$  -6.25 kcal mol<sup>-1</sup> and  $RC_{TN-2}$  -5.82 kcal mol<sup>-1</sup>) are lower than that of the corresponding TSs ( $TS_{TH-1}$  -3.65 kcal mol<sup>-1</sup>,  $TS_{TH-2}$  -3.84 kcal mol<sup>-1</sup>,  $TS_{TN-2}$  -3.51 kcal mol<sup>-1</sup>) (Table S1), indicating the IRC calculation is correct. We also test these three pathways using a larger basis set aug-cc-pVTZ within M06-2X functional. It was found the wavefunction of RCs are still stable and the energies of RCs ( $RC_{TH-1}$  -6.03 kcal mol<sup>-1</sup>,  $RC_{TH-2}$  -5.20 kcal mol<sup>-1</sup> and  $RC_{TN-2}$  -4.88 kcal mol<sup>-1</sup>) are also lower than that of the corresponding TSs ( $TS_{TH-1}$  -2.54 kcal mol<sup>-1</sup>,  $TS_{TH-2}$  -2.75 kcal mol<sup>-1</sup> and  $TS_{TN-2}$  -2.70 kcal mol<sup>-1</sup>) at the M06-2X/aug-cc-pVTZ level of theory. In addition, the barrier from RCs to TSs is low at the optimization level, indicating a fast reaction. Generally, the higher level single point energy calculation can change the barrier several kcal mol<sup>-1</sup>. In addition, RCs and TSs geometry structure at the optimization level could not be the real minima at the single point energy level since the potential energy surface could change with employed the computational level. Therefore, it is single point energy calculation that leads to apparent anomalies in physics. The similar phenomenon was found in our previous studies.<sup>7-10</sup> Actually, it is a barrierless reaction from RCs to TSs at the level of single point energy calculation, still indicating a fast reaction.

## Supporting Information

Table S1. Calculated energies (kcal mol<sup>-1</sup>) of pre-complexes (RCs) and transition states (TSs) at the M06-2X/6-31+G(d,p) level of theory.

| M06-2X/6-31+G(d,p) |            |                    |            |
|--------------------|------------|--------------------|------------|
| Species            | $\Delta E$ | Species            | $\Delta E$ |
| RC <sub>TH-1</sub> | -6.00      | TS <sub>TH-1</sub> | -3.65      |
| RC <sub>TH-2</sub> | -6.25      | TS <sub>TH-2</sub> | -3.84      |
| RC <sub>TN-2</sub> | -5.82      | TS <sub>TN-2</sub> | -3.51      |
| M06-2X/aug-cc-pVTZ |            |                    |            |
| Species            | $\Delta E$ | Species            | $\Delta E$ |
| RC <sub>TH-1</sub> | -6.03      | TS <sub>TH-1</sub> | -2.54      |
| RC <sub>TH-2</sub> | -5.20      | TS <sub>TH-2</sub> | -2.75      |
| RC <sub>TN-2</sub> | -4.88      | TS <sub>TN-2</sub> | -2.70      |

Table S2. Lennard-Jones parameters of intermediates for various reactions used in the MESMER simulations.

| Species                                   | $\sigma/(\text{\AA})$ | $\epsilon/(\text{K})$ |
|-------------------------------------------|-----------------------|-----------------------|
| IM <sub>TH-1</sub> and IM <sub>TH-2</sub> | 6.83                  | 822                   |
| IM <sub>TN-1</sub> and IM <sub>TN-2</sub> | 6.91                  | 894                   |
| IM <sub>TH-1-O-1</sub>                    | 7.11                  | 906                   |

Table S3. Effects of  $\Delta E_d$  (cm<sup>-1</sup>) and grain size on the yields of the important species for the reactions of T-ROOH/RONO<sub>2</sub> + ·OH.

| Reactions                    | Yields                |                                  |         |         |         |                                  |
|------------------------------|-----------------------|----------------------------------|---------|---------|---------|----------------------------------|
|                              | $\Delta E_d$          | Grain size = 50 cm <sup>-1</sup> |         |         |         | Grain size = 25 cm <sup>-1</sup> |
|                              | Species               | 150                              | 200     | 250     | 300     | 200                              |
| T-ROOH +<br>·OH              | P <sub>TH-1-1-2</sub> | 2.20%                            | 1.44%   | 1.05%   | 0.813%  | 1.44%                            |
|                              | TEPOX                 | 56.1%                            | 56.1%   | 56.1%   | 56.0%   | 56.1%                            |
|                              | IM <sub>TH-1-O2</sub> | 41.7%                            | 42.4%   | 42.8%   | 43.1%   | 42.4%                            |
|                              | IM <sub>TH-2-O2</sub> | 0                                | 0.0600% | 0.0050% | 0.0870% | 0.0600%                          |
| T-RONO <sub>2</sub> +<br>·OH | P <sub>TN-1-1-1</sub> | 0.400%                           | 0.200%  | 0.200%  | 0.100%  | 0.200%                           |
|                              | TEPOX                 | 27.1%                            | 22.4%   | 18.9%   | 16.4%   | 22.4%                            |
|                              | IM <sub>TN-1-O2</sub> | 55.9%                            | 56.0%   | 56.1%   | 56.1%   | 56.0%                            |
|                              | IM <sub>TN-2-O2</sub> | 16.6%                            | 21.4%   | 24.8%   | 27.4%   | 21.4%                            |

## Supporting Information

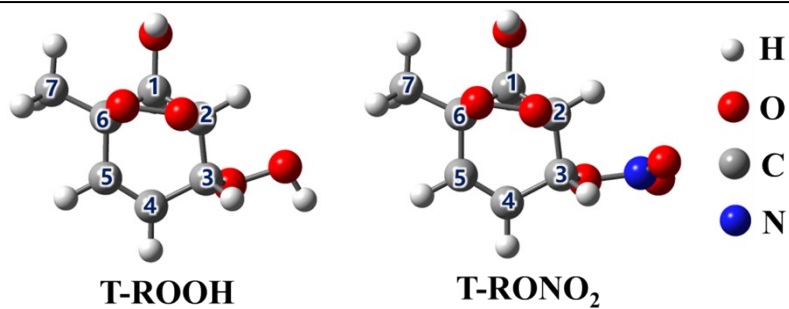

Figure S1. Global minimum of T-ROOH and T-RONO<sub>2</sub> obtained at ROCBS-QB3//M06-2X/6-31+G(d,p) level. The number represents the label of the carbon atom in the model compounds.

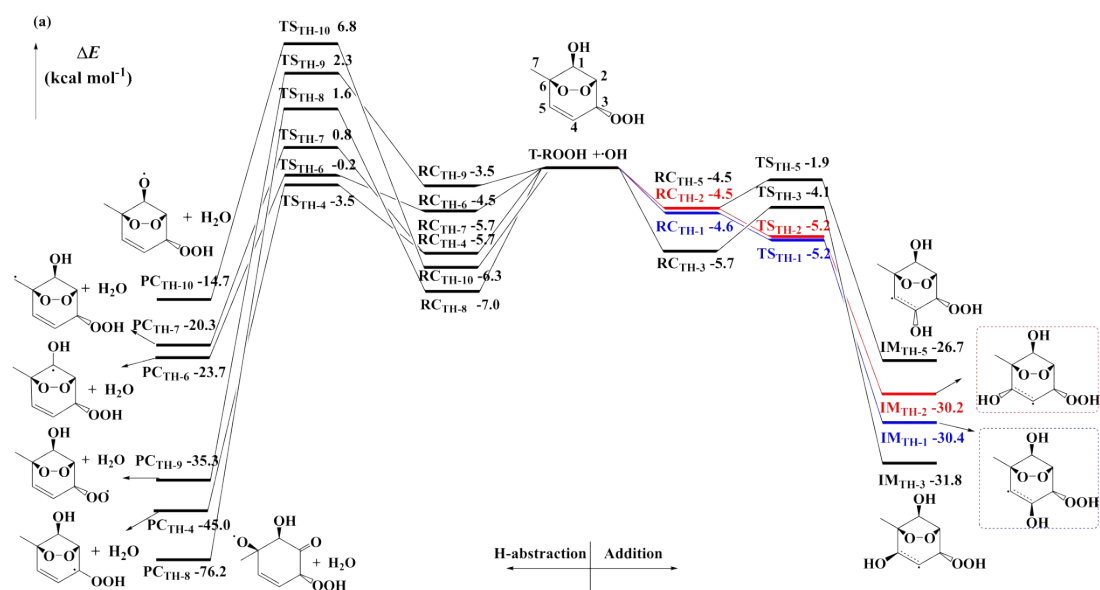

## Supporting Information

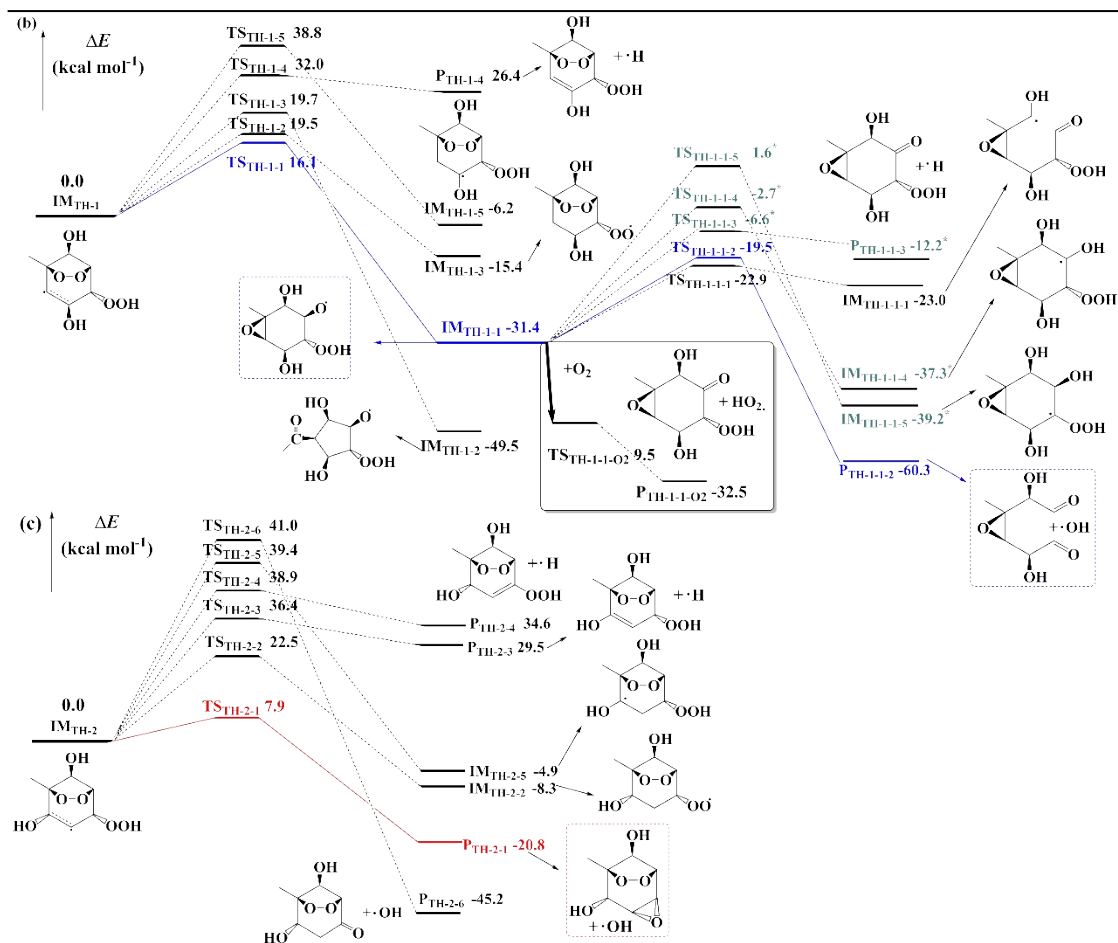

Figure S2. Schematic ZPE-corrected potential energy surfaces for initial reactions of T-ROOH +  $\cdot$ OH (a) and unimolecular reactions of IM<sub>TH-1</sub> (b) and IM<sub>TH-2</sub> (c) at the ROCBS-QB3//M06-2X/6-31+G(d,p) level. The symbols RC<sub>TH-m</sub>, TS<sub>TH-m</sub>, IM<sub>TH-m</sub> and P<sub>TH-m</sub> represent the pre-reactive complex, transition states and intermediates, respectively. It should be noted that the energies of IM<sub>TH-1-1</sub> + O<sub>2</sub> are set to zero for corresponding reactions in the insert. The symbol '\*' stands for the energies used here is obtained from the optimization level.

## Supporting Information

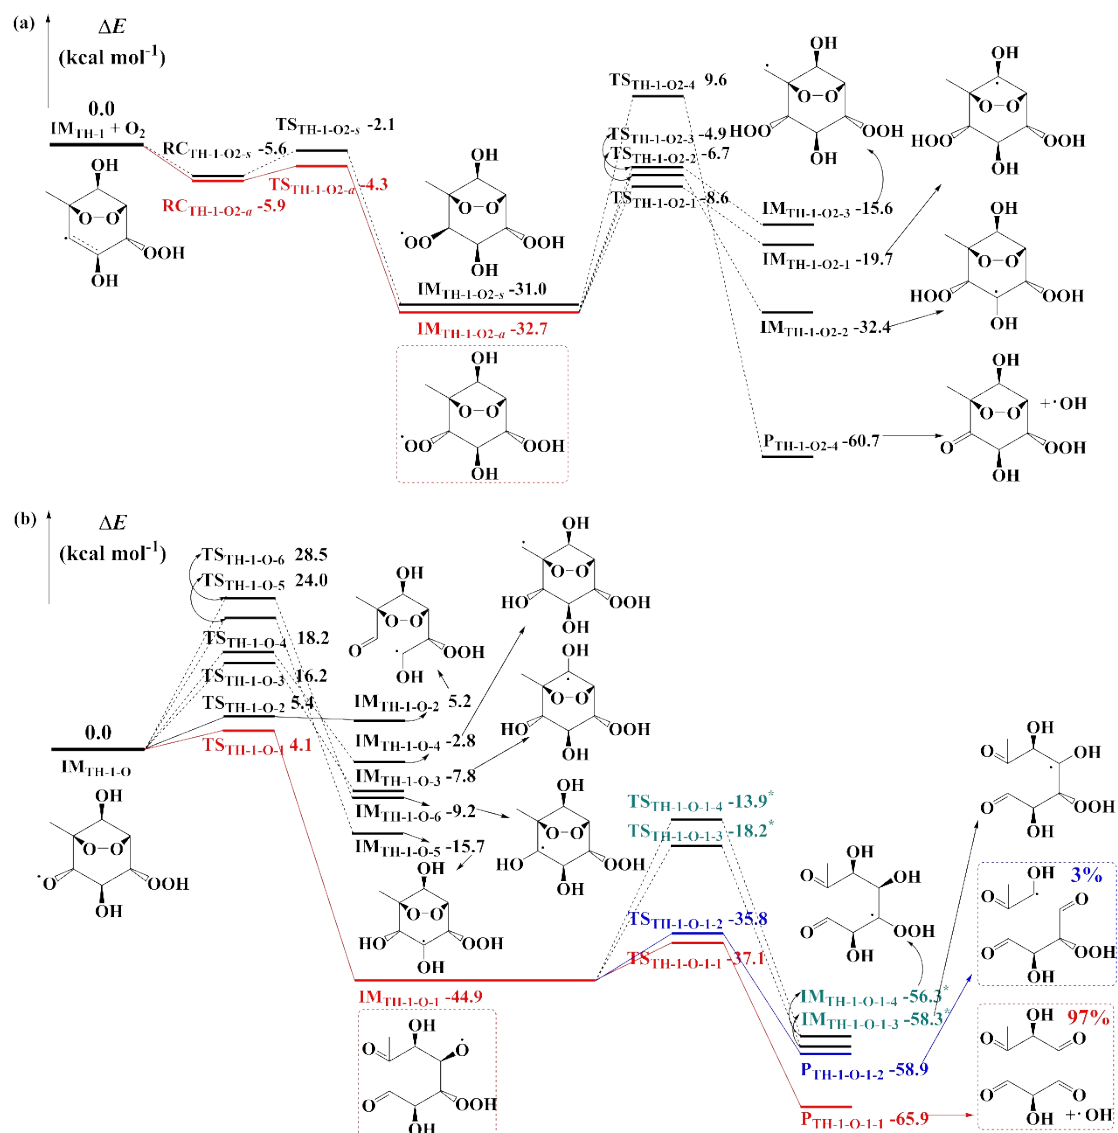

Figure S3. Schematic ZPE-corrected potential energy surfaces for IM<sub>TH-1</sub> with O<sub>2</sub> (a) and unimolecular reactions of alkoxy radicals IM<sub>TH-1-O</sub> (b) starting from T-ROOH + ·OH at the ROCBS-QB3//M06-2X/6-31+G(d,p) level. The symbols s and a stand for *syn*- and *anti*-directions of O<sub>2</sub>-additions (the same and opposite sides to the -O-O- bridge ring). The symbol '\*' stands for the energies used here is obtained from the optimization level.

# Supporting Information

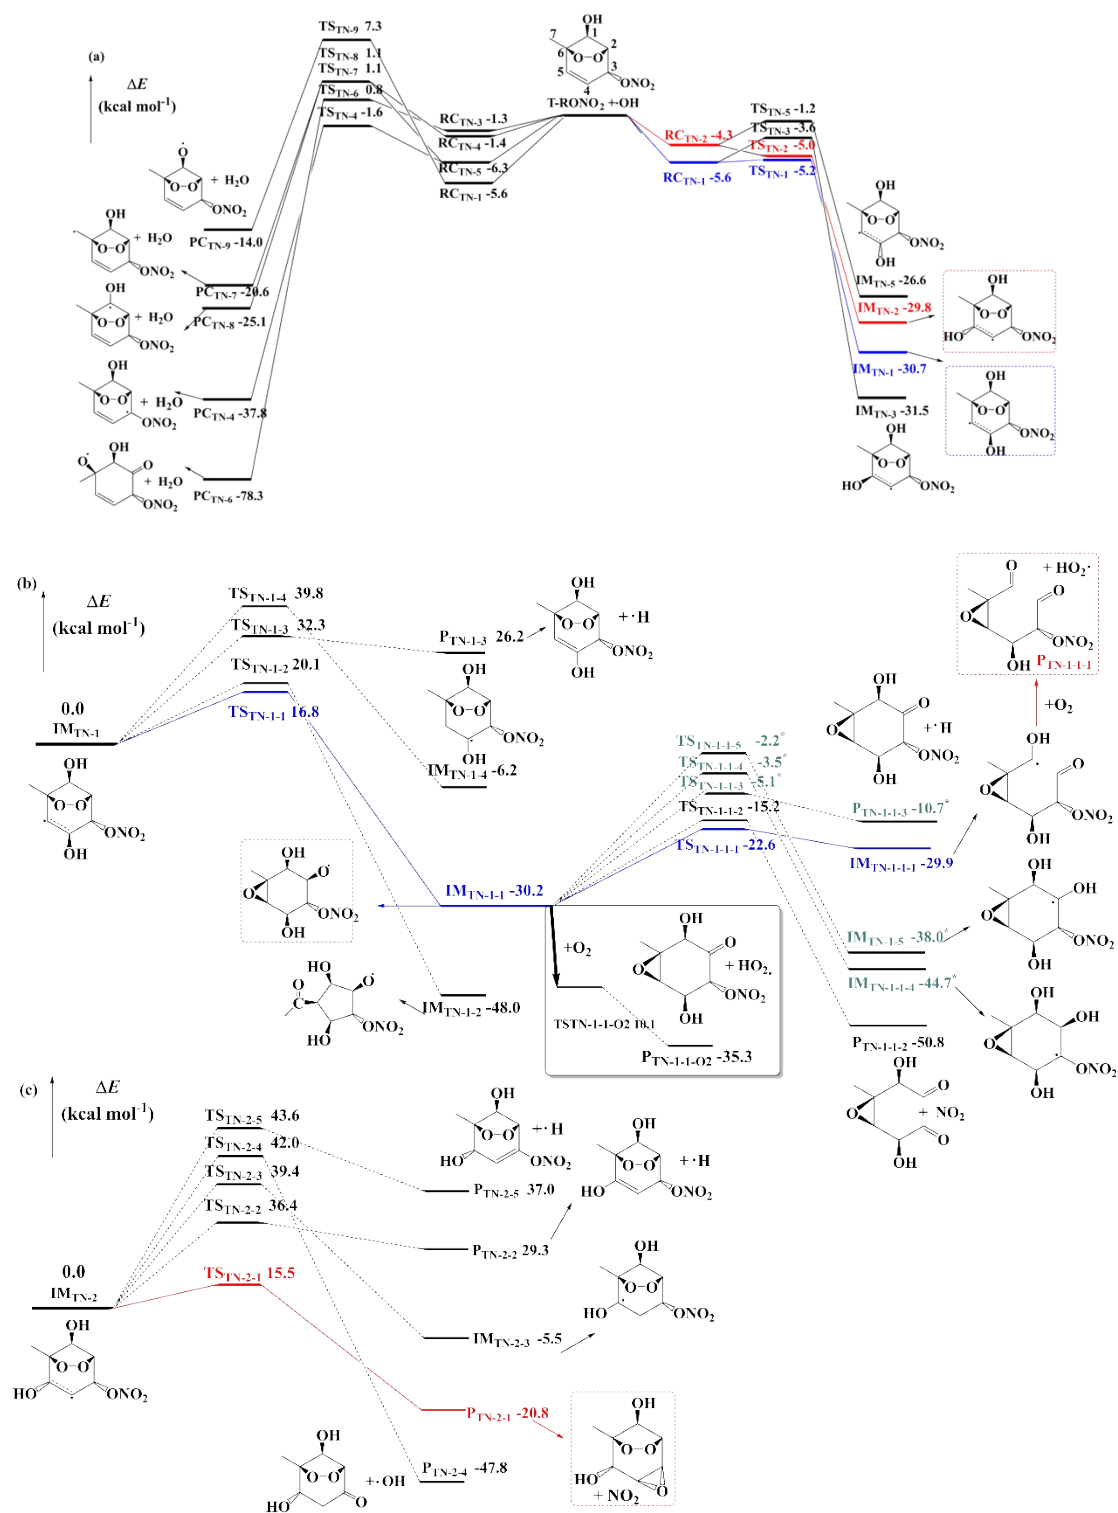

Figure S4. Schematic ZPE-corrected potential energy surfaces for initial reactions of T-RONO<sub>2</sub> + ·OH (a) and unimolecular reactions of IM<sub>TN-1</sub> (b) and IM<sub>TN-2</sub> (c) at the ROCBS-QB3//M06-2X/6-31+G(d,p) level. It should be noted that the energies of IM<sub>TN-1-1</sub> + O<sub>2</sub> are set to zero for corresponding reactions in the insert. The symbol '\*' stands



# Supporting Information

for the energies used here is obtained from the optimization level.

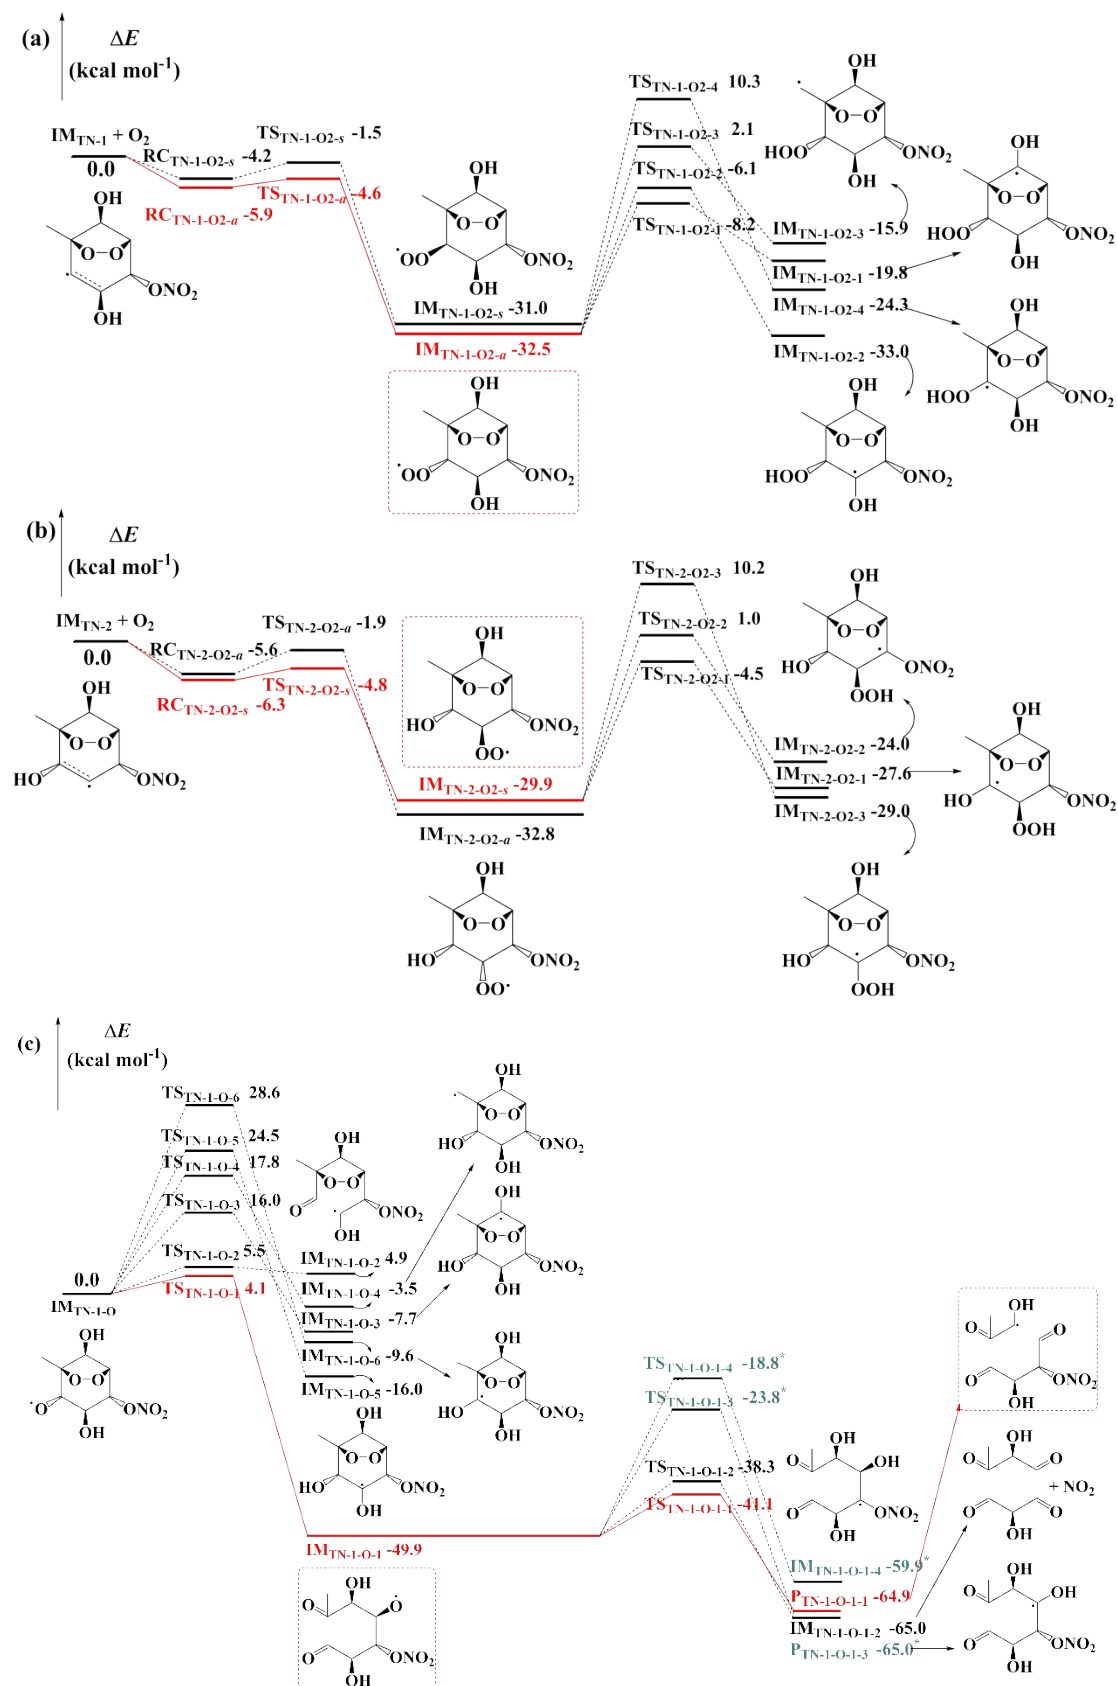

## Supporting Information

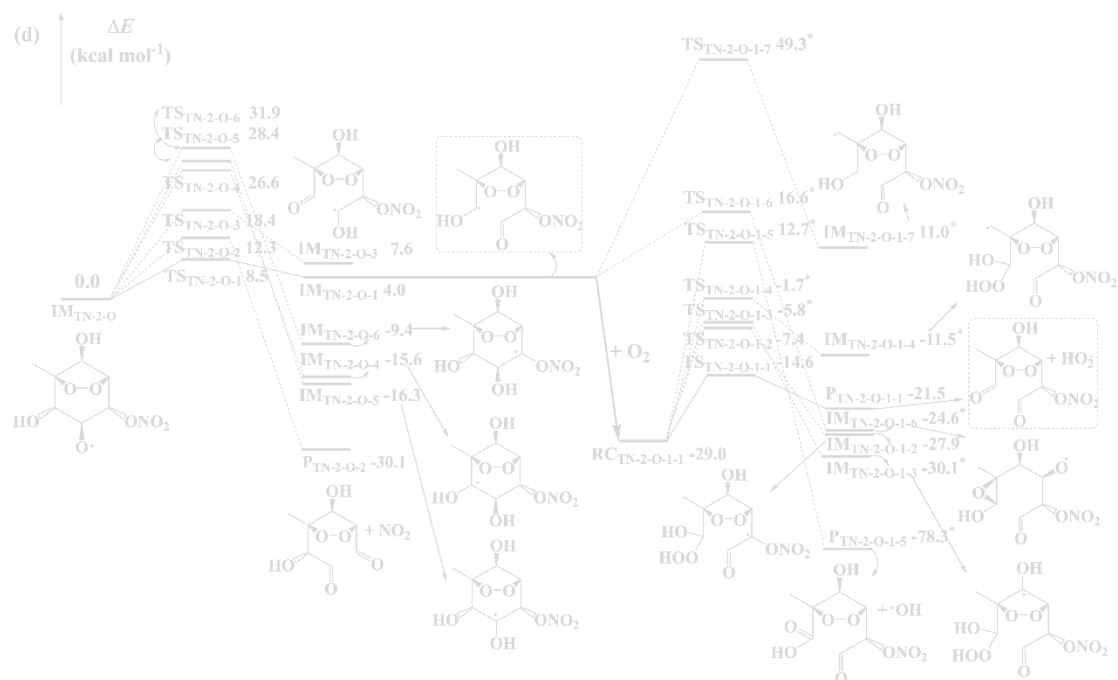

Figure S5. Schematic ZPE-corrected energy surfaces for the reactions of  $\text{IM}_{\text{TN}-1}$  (a) and  $\text{IM}_{\text{TN}-2}$  (b) with  $\text{O}_2$  and unimolecular reactions of alkoxy radicals  $\text{IM}_{\text{TN}-1-\text{O}}$  (c) and  $\text{IM}_{\text{TN}-2-\text{O}}$  (c) starting from  $\text{T-RONO}_2 + \cdot\text{OH}$  at the ROCBS-QB3//M06-2X/6-31+G(d,p) level of theory. *s* and *a* stand for *syn*- and *anti*-directions of  $\text{O}_2$ -additions (the same and opposite sides to the -O-O- bridge ring). The symbol '\*' stands for the energies used here is obtained from the optimization level.

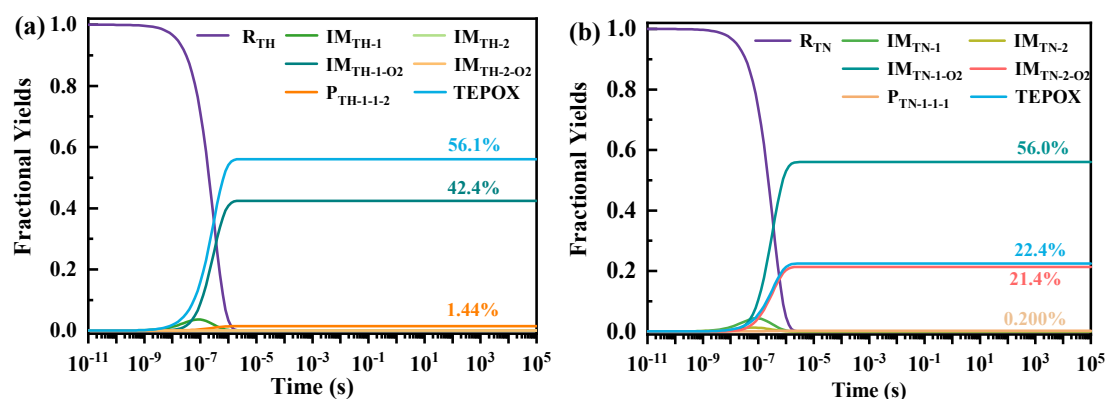

Figure S6. Variation in fractional yields of reaction products for the reactions of T-ROOH (a) and T-RONO<sub>2</sub> (b) with  $\cdot\text{OH}$ , with reaction time at 298 K and 1 atom.

## Supporting Information

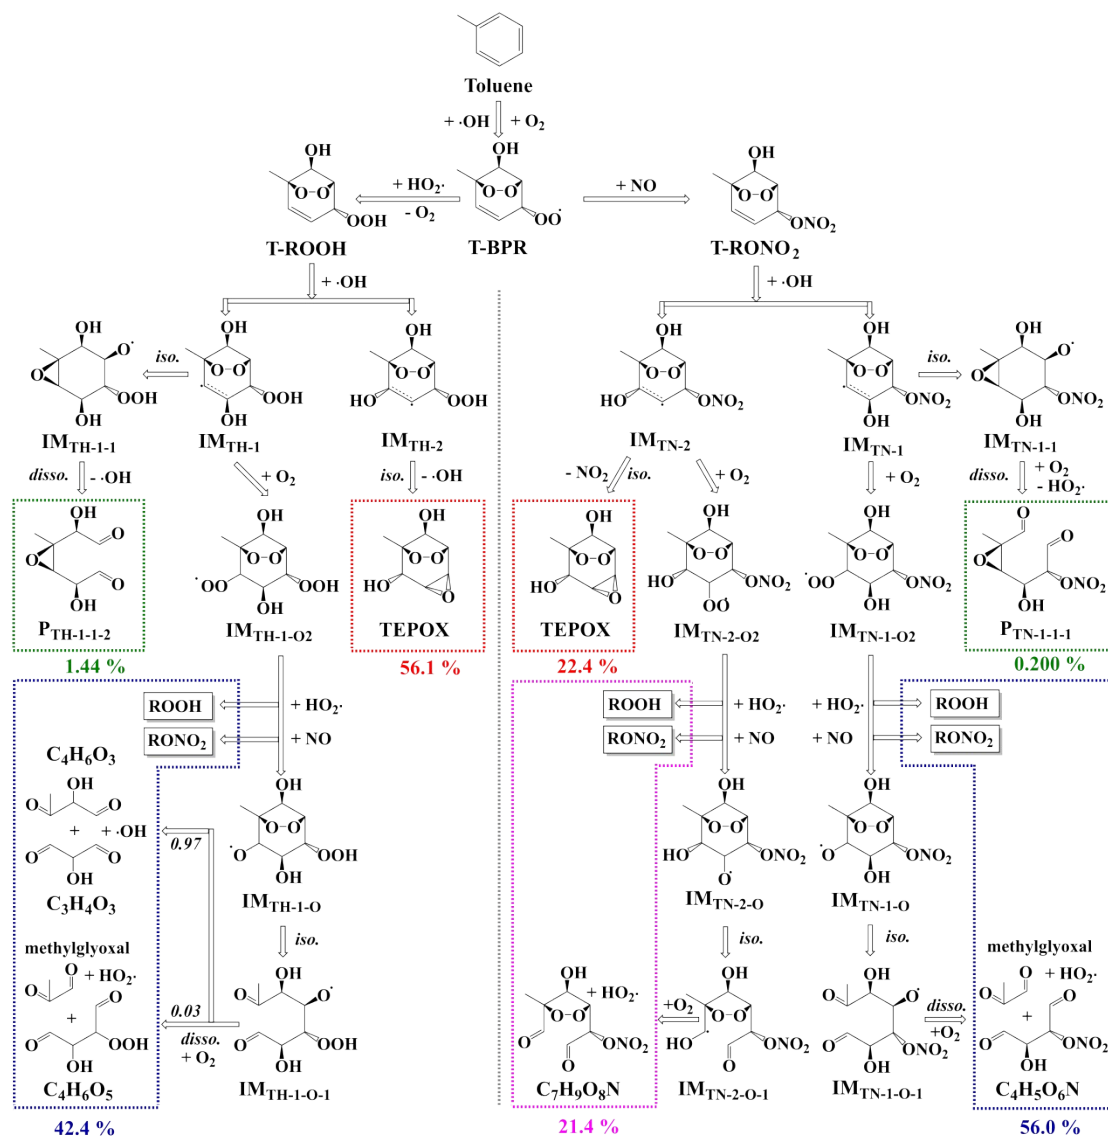

Figure S7. Main atmospheric oxidation pathways and products of the  $\cdot\text{OH}$  initiated T-ROOH/T-RONO<sub>2</sub> reactions. The calculated fractional yields of the corresponding products starting from T-ROOH/T-RONO<sub>2</sub> +  $\cdot\text{OH}$  are shown in percentages. The calculated fractional yields of the products starting from IM<sub>TH-1-O-1</sub> are presented in italic numbers.

## Supporting Information

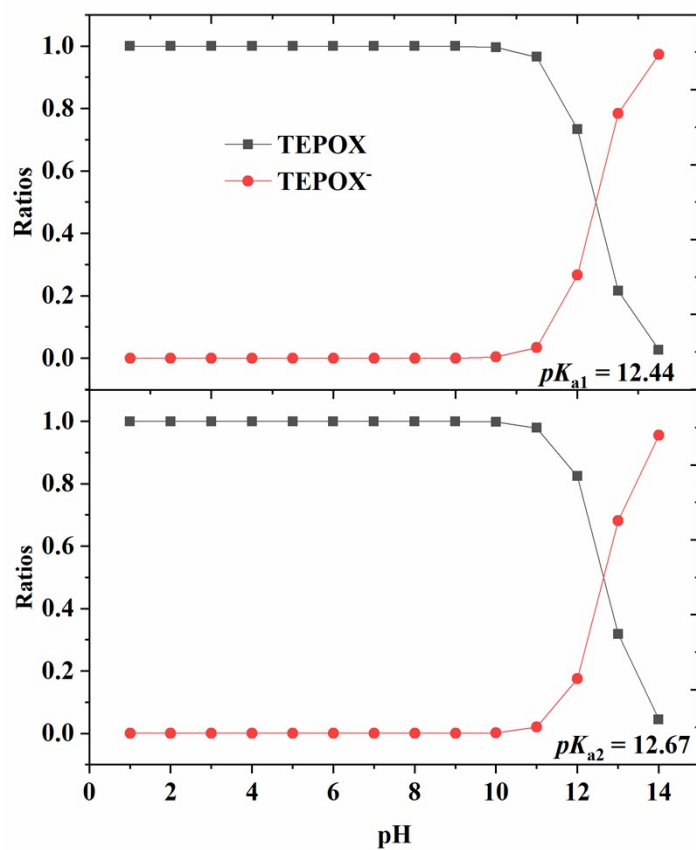

Figure S8. Calculated ratios of different dissociation forms of TEPOX as a function of pH based on the predicted  $pK_a$  values (Note:  $pK_a$  values of TEPOX were calculated by Graph- $pK_a$  model<sup>11</sup>)

## Supporting Information

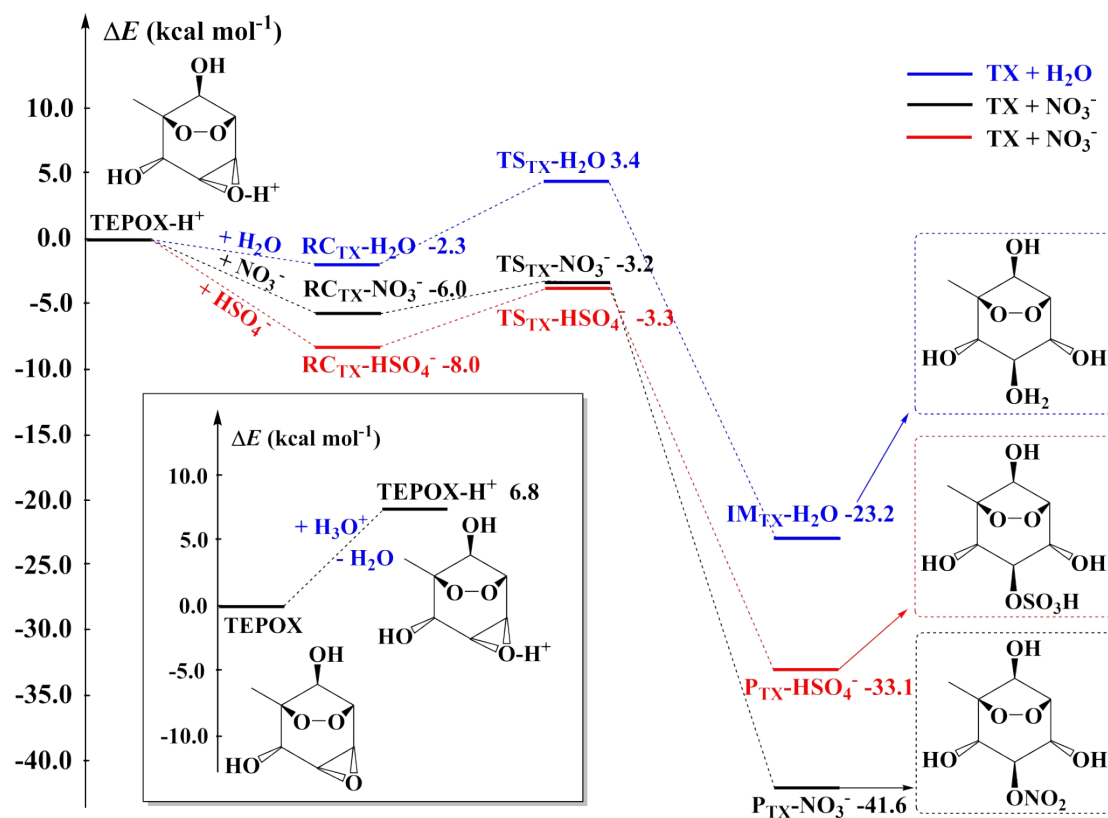

Figure S9. Calculated schematic potential energy surfaces for reactions of protonated TEPOX with H<sub>2</sub>O, NO<sub>3</sub><sup>-</sup> and HSO<sub>4</sub><sup>-</sup> in the aerosol phase at the ROCBS-QB3//M06-2X/6-31+G(d,p) level. The protonation process of TEPOX is shown in the inset.

## Supporting Information

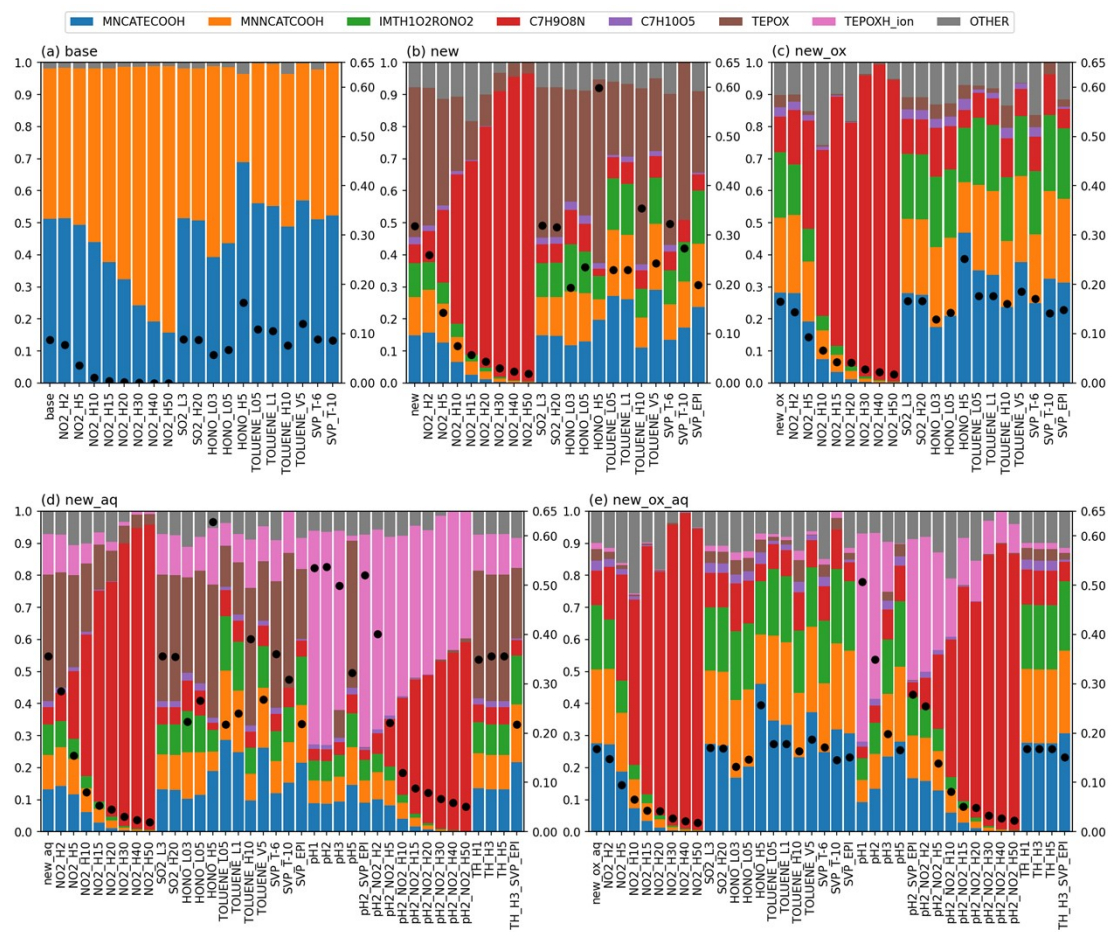

Figure S10. Contributions of seven most contributing species and other species as a whole (OTHER, gray) at the end of individual simulations are plotted. The seven species include MNCATECOOH (blue), MNNCATCOOH (orange), IMTH1O2RONO2 (green), C<sub>7</sub>H<sub>9</sub>NO<sub>8</sub> (red), C<sub>7</sub>H<sub>10</sub>O<sub>5</sub> (purple), TEPOX (brown) and TEPOXH\_ion (pink). The  $Y_{\text{mass}}$  at the end of each simulation is also plotted with a black dot. Each set of simulations, including (a) base, (b) new, (c) new\_ox, (d) new\_aq and (e) new\_ox\_aq, are plotted in different subplots. The prefixes in case names in the sets of new, new\_ox, new\_aq and new\_ox\_aq are not shown for clarity.

## Supporting Information

---

### References

1. M. A. Blitz, K. J. Hughes, M. J. Pilling and S. H. Robertson, *J. Phys. Chem. A*, 2006, **110**, 2996-3009.
2. M. E. Jenkin, S. M. Saunders, V. Wagner and M. J. Pilling, *Atmos. Chem. Phys.*, 2003, **3**, 181-193.
3. N. C. Eddingsaas, D. G. VanderVelde and P. O. Wennberg, *J. Phys. Chem. A*, 2010, **114**, 8106-8113.
4. I. R. Piletic, E. O. Edney and L. J. Bartolotti, *Phys. Chem. Chem. Phys.*, 2013, **15**, 18065-18076.
5. U. EPA.
6. J. F. Pankow and W. E. Asher, *Atmos. Chem. Phys.*, 2008, **8**, 2773-2796.
7. J. W. Xue, F. F. Ma, J. Elm, J. W. Chen and H. B. Xie, *Atmos. Chem. Phys.*, 2022, **22**, 11543-11555.
8. H. B. Xie, F. F. Ma, Y. F. Wang, N. He, Q. Yu and J. W. Chen, *Environ. Sci. Technol.*, 2015, **49**, 13246–13255.
9. G. T. Yu, X. R. Huang, Y. H. Ding, C. C. Sun and A. C. Tang, *J. Comput. Chem.*, 2006, **27**, 749-761.
10. J. L. Pang, Y. M. Wang, X. M. Zhang, Y. P. Hua, Z. Wu and Y. H. Ding, *IOP Conf. Ser.: Earth Environ. Sci.*, 2020, **545**, 012023.
11. J. C. Xiong, Z. J. Li, G. C. Wang, Z. Y. Fu, F. S. Zhong, T. Y. Xu, X. M. Liu, Z. M. Huang, X. H. Liu, K. X. Chen, H. L. Jiang and M. Y. Zheng, *Bioinformatics*, 2022, **38**, 792-798.
