# Supplementary material for: An overlooked oxidation mechanism of toluene: computational predictions and experimental validations
Source: Chem Sci. 2023 Oct 27;14(45):13050–9. doi: 10.1039/d3sc03638c (PMC10664553; doi:10.1039/d3sc03638c)
Supplement: SC-014-D3SC03638C-s003 [file SC-014-D3SC03638C-s003.xlsx]

## Sheet: R
Filename	Cartesian coordinates			Electronic properties
T-ROOH	X	Y	Z	E_elec_0K (Hartree)	ZPE (Hartree)
C	-0.369304	1.92797	0.0816225	-647.906	0.174981
C	-0.0582094	-0.572071	0.301788
C	0.854938	-0.429636	-0.923035
C	1.7115	0.718903	-0.394019
H	-0.97525	2.82376	0.18681
H	0.297085	-0.187522	-1.82866
H	2.65314	0.834575	-0.934908
O	1.62533	-1.57426	-1.17356
H	2.18181	-1.73038	-0.396728
O	0.855665	-0.401402	1.40705
O	2.07116	0.207745	0.894154
C	-0.732651	-1.91998	0.453306
H	-1.43979	-2.07387	-0.364668
H	0.0168556	-2.71184	0.436478
H	-1.28382	-1.96039	1.39645
C	0.912896	1.99018	-0.276647
H	1.40516	2.94269	-0.447433
C	-1.04862	0.612757	0.359092
O	-2.07363	0.496956	-0.629632
O	-3.11449	-0.330059	-0.103659
H	-3.86917	0.273855	-0.159664
H	-1.52302	0.624647	1.34892
T-RONO2	X	Y	Z
C	0.00496535	1.63754	0.153244	-777.103	0.174594
C	0.433868	-0.84501	0.424795
C	1.24245	-0.721545	-0.875682
C	2.08724	0.481463	-0.459767
H	-0.610826	2.51926	0.302233
H	0.610093	-0.541904	-1.74647
H	2.97609	0.613592	-1.08006
O	2.03448	-1.84703	-1.13307
H	2.67293	-1.93369	-0.409809
O	1.41567	-0.581841	1.44525
O	2.56928	0.0307649	0.811105
C	1.25083	1.72544	-0.313278
H	1.6935	2.68776	-0.551323
C	-0.59196	0.305102	0.520816
H	-1.01156	0.320304	1.53114
O	-1.64934	-0.0584168	-0.408401
N	-2.84485	0.613606	-0.233635
O	-2.91451	1.41013	0.67073
O	-3.6811	0.301366	-1.03158
C	-0.17707	-2.20443	0.697705
H	-0.645506	-2.21088	1.68602
H	-0.934224	-2.43339	-0.0548981
H	0.598728	-2.96925	0.666243

## Sheet: T-OOH
Note: *stands for without the single point eneries
Filename	Cartesian coordinates			Electronic properties
RCTH-1	X	Y	Z	E_elec_0K (Hartree)	ZPE (Hartree)
C	0.672359	0.737233	1.44368	-723.574	0.186245
C	0.416307	-0.44514	-0.747723
C	-0.72467	-1.20792	-0.091451
C	-1.48527	0.01053	0.456307
H	1.27243	1.24779	2.19073
H	-0.384825	-1.88887	0.690053
O	-1.47476	-1.9424	-1.02017
H	-1.75807	-1.34156	-1.72412
O	-0.25975	0.643578	-1.40331
O	-1.53693	0.834961	-0.728259
C	-0.657359	0.69565	1.52349
O	1.0725	3.11548	-0.751151
H	0.353767	2.50161	-1.01521
H	-1.18417	1.1875	2.33762
C	1.40031	0.112223	0.285351
H	2.06125	0.849433	-0.192007
O	2.19232	-0.940309	0.828487
O	3.05426	-1.3936	-0.216419
H	3.92362	-1.16025	0.140961
H	0.9264	-1.02106	-1.5232
C	-2.91917	-0.238339	0.874134
H	-2.92668	-0.839003	1.78772
H	-3.42009	0.712094	1.0772
H	-3.45987	-0.774774	0.094069
TSTH-1	X	Y	Z
C	-0.688925	1.34874	-0.773025	-723.576	0.18685
C	-0.473733	-0.674576	0.693511
C	0.535495	-1.21768	-0.309863
C	1.40718	0.045128	-0.416827
H	-1.28237	2.08984	-1.29618
H	0.081759	-1.50916	-1.2581
O	1.24123	-2.31633	0.198565
H	1.60043	-2.06836	1.06268
O	0.356938	-0.016325	1.65953
O	1.59679	0.350447	0.982689
C	0.619593	1.15267	-1.08058
O	-0.299138	2.76479	0.688254
H	0.328009	2.25598	1.23757
H	1.14158	1.8427	-1.73735
C	-1.43612	0.333197	0.057159
H	-2.02896	0.835631	0.828672
O	-2.30393	-0.335791	-0.856308
O	-3.17316	-1.15778	-0.077097
H	-4.03082	-0.74144	-0.247704
H	-1.01246	-1.46674	1.21873
C	2.78516	-0.148876	-1.01439
H	2.68653	-0.361303	-2.08256
H	3.37746	0.761968	-0.892559
H	3.29706	-0.982903	-0.534189
IMTH-1	X	Y	Z
C	-0.782594	1.54353	-0.420525	-723.618	0.189715
C	-0.430953	-0.673118	0.787006
C	0.539394	-1.18929	-0.269397
C	1.34089	0.112677	-0.468549
H	-1.49397	1.98338	-1.12579
H	0.044741	-1.52609	-1.18126
O	1.32477	-2.24019	0.224559
H	1.70853	-1.95718	1.06707
O	0.439571	0.001488	1.70201
O	1.5721	0.495914	0.920335
C	0.480312	1.14874	-1.1206
O	-0.549434	2.54903	0.558629
H	0.156004	2.24095	1.14615
H	0.881644	1.77817	-1.90753
C	-1.45808	0.313631	0.217852
H	-2.13982	0.653762	1.00711
O	-2.19083	-0.294792	-0.837114
O	-2.83843	-1.44586	-0.293897
H	-3.77008	-1.20136	-0.393711
H	-0.902266	-1.48456	1.34576
C	2.70318	-0.048563	-1.1119
H	2.57118	-0.299305	-2.16806
H	3.26276	0.887811	-1.04264
H	3.26638	-0.845867	-0.626645
TSTH-2	X	Y	Z
C	0.655838	1.16498	-1.17314	-723.575	0.186452
C	0.526081	-1.11211	-0.157751
C	-0.452	-0.560365	0.869948
C	-1.37767	0.171048	-0.114778
H	1.16048	1.92891	-1.75654
H	0.004281	0.101542	1.60403
O	-1.11621	-1.58767	1.55555
H	-1.5372	-2.16215	0.899783
O	-0.326727	-1.57165	-1.21523
O	-1.59956	-0.873581	-1.07828
C	-0.642225	1.30426	-0.809864
O	-0.221553	2.51012	0.890503
H	0.733978	2.36693	1.0313
H	-1.23893	2.12	-1.20641
C	1.44936	-0.024889	-0.716765
H	2.04963	-0.435646	-1.53892
O	2.32671	0.47662	0.294791
O	3.21682	-0.582263	0.648502
H	4.07076	-0.208343	0.385861
C	-2.72773	0.588957	0.42439
H	-2.58077	1.43139	1.10426
H	-3.37759	0.901887	-0.397572
H	-3.19712	-0.235089	0.962319
H	1.08672	-1.97336	0.212968
RCTH-2	X	Y	Z
C	0.665335	0.932376	-1.34498	-723.574	0.186155
C	0.308098	-1.16081	-0.023861
C	-0.559236	-0.334807	0.915808
C	-1.43649	0.321404	-0.162442
H	1.26049	1.57157	-1.99078
H	-0.004708	0.388973	1.51269
O	-1.30036	-1.14769	1.78529
H	-1.80241	-1.7777	1.24836
O	-0.634208	-1.68932	-0.967104
O	-1.81833	-0.842262	-0.917487
C	-0.598927	1.23263	-1.03821
O	0.889945	2.63321	0.91797
H	1.64077	2.00291	0.922132
H	-1.07172	2.12296	-1.44541
C	1.32089	-0.298102	-0.78234
H	1.79753	-0.894604	-1.5708
O	2.33864	0.196994	0.096548
O	3.08799	-0.916321	0.575346
H	3.94783	-0.764678	0.155279
C	-2.70515	0.979137	0.334996
H	-2.43637	1.88091	0.892313
H	-3.33835	1.2622	-0.510208
H	-3.25617	0.306101	0.992501
H	0.786515	-2.00643	0.475609
IMTH-2	X	Y	Z
C	-0.637056	1.2781	1.12311	-723.618	0.189875
C	-0.569422	-1.08596	0.365476
C	0.368315	-0.740109	-0.785379
C	1.31467	0.188637	-0.012148
H	-1.03455	2.04524	1.7763
H	-0.130589	-0.254787	-1.62471
O	1.01458	-1.88586	-1.27472
H	1.41613	-2.34345	-0.521841
O	0.334981	-1.37388	1.42817
O	1.52506	-0.554012	1.19916
C	0.615501	1.52226	0.344967
O	0.355469	2.28494	-0.834802
H	-0.511963	2.03502	-1.18245
H	1.31937	2.11773	0.936566
C	-1.46781	0.094462	0.763352
H	-2.1427	-0.198666	1.57654
O	-2.24998	0.52421	-0.366727
O	-3.05458	-0.583594	-0.783046
H	-3.9453	-0.246068	-0.607795
C	2.67067	0.422312	-0.64533
H	2.55323	1.11094	-1.4853
H	3.34646	0.873531	0.086596
H	3.09864	-0.515512	-1.00074
H	-1.14227	-1.99656	0.178279
TSTH-3	X	Y	Z
C	-0.519019	1.49899	-0.654187	-723.573	0.186561
C	-0.721875	-0.672782	0.577143
C	0.206697	-1.21847	-0.502019
C	1.31934	-0.164483	-0.352854
H	-0.933	2.41628	-1.05932
H	-0.250867	-1.22882	-1.49259
O	0.652057	-2.51438	-0.21085
H	1.03983	-2.50749	0.676056
O	0.170666	-0.367657	1.65508
O	1.49503	-0.191662	1.07486
C	0.790616	1.18376	-0.833782
O	1.45923	2.53042	0.582188
H	1.41804	1.89527	1.32184
H	1.40142	1.74722	-1.52976
C	-1.43512	0.608851	0.134731
H	-1.83516	1.12686	1.0172
O	-2.51009	0.295853	-0.748606
O	-3.50896	-0.361424	0.032547
H	-4.25357	0.250617	-0.060815
H	-1.43359	-1.41713	0.941775
C	2.66222	-0.510027	-0.960117
H	2.57116	-0.527927	-2.04959
H	3.39654	0.250357	-0.680792
H	2.99855	-1.48942	-0.619267
RCTH-3	X	Y	Z
C	0.639697	1.17934	1.06866	-723.576	0.186421
C	0.522857	-0.566324	-0.717874
C	-0.467568	-1.28811	0.184807
C	-1.40108	-0.094395	0.446211
H	1.16452	1.95637	1.61569
H	-0.005558	-1.67982	1.09197
O	-1.11334	-2.34394	-0.472892
H	-1.51216	-1.99536	-1.2831
O	-0.326803	0.210924	-1.58098
O	-1.61216	0.359547	-0.907522
C	-0.668558	0.971	1.23582
O	-0.041375	3.06505	-0.742214
H	-0.417207	2.31383	-1.24649
H	-1.24959	1.59178	1.91325
C	1.43477	0.372158	0.078577
H	1.97423	1.03706	-0.608425
O	2.37417	-0.381162	0.840581
O	3.26346	-0.999987	-0.090624
H	4.1052	-0.585186	0.148228
H	1.09529	-1.24678	-1.35234
C	-2.7636	-0.430472	1.01378
H	-2.6466	-0.763508	2.04877
H	-3.40295	0.456294	1.00289
H	-3.23595	-1.22735	0.438867
IMTH-3	X	Y	Z
C	-0.439608	1.68036	-0.029223	-723.621	0.189694
C	-0.821821	-0.711639	0.563283
C	0.096675	-1.08433	-0.591185
C	1.2721	-0.16442	-0.242461
H	-0.712355	2.72989	-0.033385
H	-0.345003	-0.864945	-1.56636
O	0.445111	-2.44368	-0.57029
H	0.779611	-2.65387	0.313111
O	0.056801	-0.685754	1.68657
O	1.38101	-0.336888	1.18154
C	0.92671	1.31454	-0.520522
O	1.90741	2.1601	0.052233
H	1.93496	1.95676	0.998936
H	0.998582	1.48478	-1.60539
C	-1.4564	0.665465	0.362626
H	-1.98245	0.963402	1.27991
O	-2.40897	0.60968	-0.709112
O	-3.47928	-0.234628	-0.272318
H	-4.2225	0.385692	-0.282495
H	-1.57682	-1.47547	0.763528
C	2.60788	-0.555681	-0.844466
H	2.55169	-0.469889	-1.9334
H	3.39056	0.11358	-0.48269
H	2.85387	-1.58636	-0.589025
TSTH-4	X	Y	Z
C	-0.4513	-0.985456	1.44783	-723.569	0.182663
C	-0.319424	0.52737	-0.553839
C	0.956107	1.06851	0.077729
C	1.64387	-0.288841	0.309367
H	-1.01476	-1.53268	2.19756
H	0.776489	1.62239	1.0005
O	1.66779	1.8931	-0.802082
H	1.79889	1.40754	-1.62929
O	0.17234	-0.45937	-1.47177
O	1.47663	-0.891779	-0.988285
C	0.877683	-1.0693	1.35868
O	-2.52222	-1.62641	-1.26872
H	-1.68962	-1.71681	-1.77421
H	1.44349	-1.7086	2.03212
C	-1.22329	-0.166113	0.466181
H	-1.90786	-0.872625	-0.141246
O	-2.04832	0.722536	1.18239
O	-2.88201	1.39697	0.248048
H	-3.64982	0.804663	0.190771
C	3.13345	-0.234625	0.577863
H	3.30474	0.197559	1.56761
H	3.55413	-1.24368	0.559485
H	3.6363	0.381371	-0.167901
H	-0.868107	1.27123	-1.13487
RCTH-4	X	Y	Z
C	0.639699	1.17972	1.06794	-723.576	0.18642
C	0.522951	-0.567089	-0.717507
C	-0.467717	-1.28814	0.185593
C	-1.40114	-0.094171	0.445945
H	1.16465	1.95675	1.61483
H	-0.005971	-1.67918	1.09317
O	-1.11336	-2.34441	-0.471487
H	-1.51354	-1.996	-1.2811
O	-0.326538	0.209366	-1.58141
O	-1.61183	0.358949	-0.908029
C	-0.668576	0.971532	1.23517
O	-0.041965	3.06508	-0.742094
H	-0.418834	2.31431	-1.24622
H	-1.24958	1.59248	1.91248
C	1.43476	0.37212	0.078195
H	1.97396	1.03668	-0.609343
O	2.37447	-0.380558	0.8405
O	3.26399	-0.999407	-0.090379
H	4.10556	-0.58393	0.147976
C	-2.76385	-0.429578	1.0135
H	-2.64717	-0.762082	2.04868
H	-3.403	0.457329	1.00191
H	-3.23637	-1.22668	0.439003
H	1.09541	-1.24822	-1.35123
PCTH-4	X	Y	Z
C	0.391539	-1.55714	-0.918763	-723.639	0.186892
C	0.212435	0.853275	-0.325511
C	-1.24763	0.766244	-0.772133
C	-1.63193	-0.479777	0.047141
H	0.962456	-2.40428	-1.28705
H	-1.36509	0.615002	-1.84606
O	-1.96714	1.90858	-0.406272
H	-1.81016	2.07359	0.534829
O	0.055884	0.765437	1.10956
O	-1.08131	-0.120677	1.3476
C	-0.919622	-1.68901	-0.502704
O	2.52548	-0.420155	1.85131
H	1.59152	-0.152332	1.89185
H	-1.42945	-2.64559	-0.519174
C	1.00119	-0.309092	-0.847567
H	2.55484	-1.36885	2.00867
O	2.2798	-0.1636	-1.27094
O	2.94354	0.853387	-0.516729
H	3.0822	0.391043	0.343111
C	-3.11775	-0.692941	0.25186
H	-3.57371	-0.986919	-0.697506
H	-3.28142	-1.49266	0.979215
H	-3.59345	0.221565	0.606785
H	0.682894	1.81636	-0.524861
TSTH-5	X	Y	Z
C	0.694295	1.30096	-0.875502	-723.57	0.186626
C	0.320325	-1.07601	-0.132271
C	-0.638049	-0.477472	0.888243
C	-1.48819	0.332851	-0.104274
H	1.26516	2.0369	-1.42827
H	-0.152495	0.144865	1.6401
O	-1.38505	-1.46407	1.54608
H	-1.81628	-2.01097	0.8735
O	-0.543289	-1.46035	-1.21072
O	-1.76618	-0.680685	-1.08785
C	-0.656625	1.42358	-0.734844
O	0.995166	2.38772	0.85705
H	1.57834	1.73031	1.28023
H	-1.15311	2.34153	-1.03524
C	1.33454	-0.051934	-0.653825
H	1.74419	-0.418278	-1.60445
O	2.4075	0.124093	0.26909
O	3.12487	-1.10609	0.325984
H	3.98398	-0.839974	-0.034127
C	-2.8184	0.831906	0.418605
H	-2.63643	1.62619	1.14761
H	-3.41568	1.23743	-0.402518
H	-3.36727	0.023611	0.902383
H	0.818016	-1.97979	0.226981
RCTH-5	X	Y	Z
C	0.665232	0.93227	-1.3454	-723.574	0.186161
C	0.308153	-1.1609	-0.024175
C	-0.558891	-0.334803	0.915686
C	-1.43633	0.321453	-0.162343
H	1.26022	1.57137	-1.99145
H	-0.004207	0.388953	1.51244
O	-1.29986	-1.14769	1.78535
H	-1.80235	-1.7774	1.24847
O	-0.634359	-1.68939	-0.967131
O	-1.81843	-0.842138	-0.917402
C	-0.598924	1.23261	-1.03832
O	0.889991	2.633	0.918017
H	1.64113	2.00309	0.922333
H	-1.07183	2.12294	-1.44543
C	1.32084	-0.298209	-0.782828
H	1.79751	-0.894652	-1.57132
O	2.33866	0.197135	0.095958
O	3.08701	-0.916048	0.576418
H	3.94645	-0.76701	0.154616
C	-2.70476	0.979315	0.33552
H	-2.43559	1.88079	0.893162
H	-3.33805	1.26289	-0.509458
H	-3.25587	0.306192	0.992883
H	0.786597	-2.00653	0.475218
IMTH-5	X	Y	Z
C	0.752626	1.51785	-0.428591	-723.612	0.189254
C	0.34836	-0.979884	0.005259
C	-0.740725	-0.424057	0.918757
C	-1.52809	0.328147	-0.169894
H	1.27564	2.15552	-1.1517
H	-0.367188	0.227741	1.70687
O	-1.49438	-1.45143	1.50504
H	-1.79936	-2.03523	0.795511
O	-0.408789	-1.48647	-1.10147
O	-1.64694	-0.7181	-1.16546
C	-0.710057	1.45524	-0.728088
O	0.895712	2.06564	0.88211
H	1.81438	1.95699	1.16399
H	-1.18288	2.19423	-1.36453
C	1.33037	0.088263	-0.50449
H	1.56919	-0.153369	-1.54775
O	2.52543	0.128741	0.263436
O	3.20649	-1.10824	0.090311
H	3.97131	-0.836098	-0.438739
C	-2.941	0.738004	0.197168
H	-2.89911	1.54098	0.937718
H	-3.46641	1.10475	-0.688871
H	-3.48658	-0.107845	0.617563
H	0.88185	-1.83015	0.437504
TSTH-6	X	Y	Z
C	-0.555236	-0.788648	1.63257	-723.561	0.180599
C	-0.403284	-0.556265	-0.854382
C	0.532251	0.612486	-0.601155
C	1.47624	-0.077436	0.387861
H	-1.08805	-1.05842	2.53968
H	-0.00134	1.57103	-0.086755
O	1.15231	1.08363	-1.74627
H	1.62329	0.346391	-2.16516
O	0.507989	-1.65788	-0.999396
O	1.76334	-1.27327	-0.364038
C	0.729478	-0.436407	1.65658
O	-0.661681	2.52622	0.488215
H	-1.50545	2.04374	0.592281
H	1.28756	-0.427045	2.58945
C	-1.31962	-0.845442	0.338762
O	-2.35385	0.137663	0.444978
O	-3.20124	-0.010801	-0.693263
H	-4.03244	-0.284844	-0.277959
H	-1.78739	-1.82873	0.20082
H	-0.96282	-0.461034	-1.78768
C	2.78908	0.629574	0.642519
H	2.58992	1.54693	1.20348
H	3.45192	-0.010304	1.23082
H	3.27633	0.890527	-0.297314
RCTH-6	X	Y	Z
C	-0.665277	0.931749	1.34561	-723.574	0.186159
C	-0.30778	-1.16106	0.024037
C	0.559022	-0.334653	-0.915782
C	1.43639	0.321692	0.162278
H	-1.26039	1.57064	1.99175
H	0.004087	0.388942	-1.5125
O	1.30013	-1.14719	-1.78561
H	1.80329	-1.77651	-1.24889
O	0.634877	-1.68919	0.967145
O	1.8189	-0.842055	0.916879
C	0.598805	1.23243	1.03854
O	-0.891785	2.63368	-0.917862
H	-1.64103	2.00151	-0.920817
H	1.07151	2.12275	1.44588
C	-1.32068	-0.298753	0.782841
O	-2.33867	0.196565	-0.095741
O	-3.0869	-0.916625	-0.576355
H	-3.9467	-0.767029	-0.155489
H	-1.79713	-0.895519	1.57122
H	-0.785947	-2.0068	-0.475432
C	2.70465	0.979986	-0.335417
H	2.4354	1.88191	-0.892258
H	3.3381	1.26287	0.509664
H	3.25564	0.307403	-0.993436
PCTH-6	X	Y	Z
C	0.082763	-1.82526	0.842484	-723.606	0.187425
C	-0.293678	-0.04892	-0.875099
C	0.466549	0.80724	0.089493
C	1.69968	-0.0252	0.257833
H	-0.208766	-2.73207	1.36469
H	-2.90502	1.97796	-0.117808
O	0.594443	2.13939	-0.060002
H	-0.305969	2.51261	-0.113947
O	0.715047	-0.601311	-1.74855
O	2.00055	-0.386385	-1.11167
C	1.29131	-1.2835	1.0102
O	-2.1354	2.16926	0.430258
H	-2.01598	1.36249	0.954844
H	2.02796	-1.75173	1.65923
C	-0.916333	-1.22817	-0.11574
O	-2.03492	-0.791245	0.671646
O	-3.09926	-0.486506	-0.235645
H	-3.74056	-1.18009	-0.020892
H	-1.27227	-1.98365	-0.82687
H	-1.02326	0.483226	-1.4899
C	2.91714	0.674734	0.815842
H	2.7263	0.957617	1.85433
H	3.78254	0.007767	0.781527
H	3.12679	1.57472	0.236502
TSTH-7	X	Y	Z
C	0.639375	-1.74411	-0.245611	-723.561	0.18159
C	0.958713	0.60772	0.552621
C	0.099127	1.02457	-0.632979
C	-1.06506	0.050549	-0.367956
H	0.980213	-2.76744	-0.37316
H	0.586504	0.861248	-1.59469
O	-0.294483	2.36646	-0.555311
H	-0.673099	2.51931	0.322495
O	0.015024	0.50981	1.62894
O	-1.29462	0.309794	1.03198
C	-0.602615	-1.37858	-0.561929
O	-3.80981	-1.08425	0.371608
H	-3.26443	-0.861613	1.15098
H	-1.32987	-2.09845	-0.929169
C	1.61794	-0.756556	0.329643
O	2.67705	-0.651754	-0.617889
O	3.71295	0.114187	0.000634
H	4.44477	-0.519658	-0.008506
H	2.02511	-1.12143	1.28179
C	-2.36059	0.360204	-1.06725
H	-2.36206	0.020702	-2.10468
H	-3.20824	-0.299387	-0.524282
H	-2.6623	1.40244	-0.971159
H	1.69319	1.36756	0.831463
RCTH-7	X	Y	Z
C	0.639651	-1.17956	-1.06843	-723.576	0.18642
C	0.522947	0.566505	0.717787
C	-0.467485	1.28816	-0.185031
C	-1.40102	0.094408	-0.446179
H	1.16447	-1.95661	-1.61542
H	-0.005536	1.67968	-1.0923
O	-1.11319	2.3441	0.472538
H	-1.51259	1.99548	1.28244
O	-0.326735	-0.210347	1.58115
O	-1.612	-0.359321	0.907574
C	-0.668584	-0.971128	-1.23567
O	-0.041953	-3.06485	0.742353
H	-0.418335	-2.31372	1.24631
H	-1.24966	-1.59192	-1.91305
C	1.43474	-0.372291	-0.078442
O	2.37431	0.380758	-0.840553
O	3.26363	0.999715	0.090438
H	4.10525	0.58424	-0.147704
H	1.97404	-1.03716	0.608723
C	-2.76359	0.430337	-1.01378
H	-2.64668	0.762959	-2.0489
H	-3.40296	-0.456411	-1.00248
H	-3.23592	1.22744	-0.439157
H	1.09549	1.24709	1.35202
PCTH-7	X	Y	Z
C	0.440458	-1.63237	-0.570065	-723.598	0.185629
C	0.931086	0.499042	0.646293
C	0.211504	1.20018	-0.496237
C	-1.06216	0.336185	-0.495171
H	0.680974	-2.65552	-0.843804
H	0.759117	1.15072	-1.43796
O	-0.059708	2.54508	-0.210609
H	-0.533571	2.58162	0.63278
O	-0.096484	0.314386	1.63081
O	-1.37378	0.389539	0.935815
C	-0.7347	-1.08855	-0.888326
O	-3.37004	-1.57493	0.434226
H	-2.76645	-1.07295	1.00168
H	-1.50792	-1.65951	-1.39395
C	1.46964	-0.868318	0.216808
O	2.59756	-0.713444	-0.64122
O	3.65714	-0.183323	0.158111
H	4.317	-0.888017	0.085404
H	1.77551	-1.43319	1.10739
C	-2.21825	0.908452	-1.21852
H	-3.04372	0.263031	-1.48826
H	-4.16637	-1.73021	0.95005
H	-2.28934	1.98147	-1.33695
H	1.7117	1.11637	1.09781
TSTH-8	X	Y	Z
C	0.02399	-2.00916	0.55197	-723.559	0.181097
C	0.502795	0.394727	0.235082
C	-0.51969	0.390253	-0.888126
C	-1.6489	-0.275276	-0.074244
H	0.308511	-3.01775	0.838132
H	-0.195145	-0.203995	-1.74292
O	-0.861737	1.6672	-1.34212
H	-1.04519	2.22937	-0.576725
O	-0.229287	0.763211	1.39671
O	-1.63854	0.563998	1.09716
C	-1.24648	-1.68719	0.305012
O	1.99107	2.35989	0.47865
H	1.43239	2.59573	1.24239
H	-2.03589	-2.42832	0.405546
C	1.12698	-0.982239	0.452794
O	1.92227	-1.37454	-0.656743
O	3.0137	-0.458003	-0.72997
H	3.76704	-1.03689	-0.542074
H	1.74101	-0.969817	1.36311
C	-3.03411	-0.178956	-0.675018
H	-3.08196	-0.809181	-1.56729
H	-3.77923	-0.531755	0.043295
H	-3.25779	0.85011	-0.957138
H	1.33898	1.2355	0.099346
RCTH-8	X	Y	Z
C	-1.32967	-1.58935	-0.61766	-723.577	0.185364
C	-0.491694	0.727296	-0.156125
C	0.302176	0.090412	0.976698
C	0.96204	-1.02289	0.140643
H	-2.09942	-2.28185	-0.946181
H	-0.351824	-0.318632	1.74949
O	1.20716	0.955003	1.59075
H	1.70943	1.45933	0.926224
O	0.428557	0.750077	-1.25775
O	1.42433	-0.280649	-1.00809
C	-0.10213	-2.00579	-0.306775
O	2.7378	2.18485	-0.567108
H	2.58803	1.35079	-1.06226
H	0.172895	-3.0544	-0.393569
C	-1.70083	-0.131921	-0.543226
O	-2.72126	-0.037814	0.446461
O	-3.23681	1.29354	0.386047
H	-4.16252	1.12575	0.157019
H	-2.10142	0.218625	-1.50364
C	2.17645	-1.67658	0.762549
H	1.86159	-2.2668	1.62759
H	2.65881	-2.34295	0.042044
H	2.88626	-0.918882	1.09671
H	-0.778127	1.76189	0.047501
PCTH-8	X	Y	Z
C	-0.168727	1.85169	-0.630872	-723.688	0.186058
C	0.427298	-0.521117	-0.149243
C	-0.85305	-0.651263	0.632314
C	-1.94051	0.1314	-0.160902
H	0.122225	2.85966	-0.913565
H	-0.708253	-0.170428	1.60909
O	-1.23127	-1.97921	0.816094
H	-0.809372	-2.50411	0.119334
O	0.954911	-1.47717	-0.680329
O	-2.21002	-0.505334	-1.36192
C	-1.45824	1.51741	-0.557905
O	3.65	-0.540444	-0.823455
H	2.91064	-1.15111	-0.980503
H	-2.23295	2.23148	-0.825775
C	0.951632	0.901587	-0.29829
O	1.48708	1.34906	0.945635
O	2.32428	0.32017	1.46432
H	3.07188	0.28127	0.832399
H	1.73254	0.91099	-1.07018
C	-3.24222	0.196954	0.648031
H	-3.06766	0.767049	1.56474
H	-4.02137	0.682781	0.056803
H	-3.5556	-0.815872	0.908324
H	4.46097	-0.988153	-1.08223
TSTH-9	X	Y	Z
C	-0.346139	1.66223	-0.034973	-723.559	0.182251
C	-0.008548	-0.772175	0.435123
C	1.04438	-0.737682	-0.663922
C	1.83166	0.471776	-0.13299
H	-0.966964	2.55215	-0.084091
H	0.623087	-0.579834	-1.6576
O	1.81389	-1.90894	-0.691145
H	2.16826	-2.0528	0.198368
O	0.752219	-0.559624	1.62992
O	1.99813	0.083362	1.24144
C	0.972791	1.71801	-0.218785
O	-4.61665	0.28497	0.272758
H	-4.72641	0.743418	-0.580747
H	1.47032	2.66694	-0.40513
C	-1.02693	0.360458	0.281665
H	-1.62089	0.448251	1.20206
O	-1.91489	0.091684	-0.809429
O	-2.75193	-0.972528	-0.453163
H	-3.47702	-0.518698	0.124507
H	-0.499638	-1.74456	0.523492
C	3.21842	0.6621	-0.710575
H	3.13335	0.979437	-1.75365
H	3.75307	1.4357	-0.152763
H	3.78291	-0.26969	-0.67069
RCTH-9	X	Y	Z
C	-0.49931	1.52619	0.304628	-723.573	0.187546
C	0.106866	-0.89529	0.459361
C	1.00965	-0.646987	-0.740608
C	1.74608	0.578116	-0.173894
H	-1.19265	2.35309	0.435144
H	0.456882	-0.435667	-1.65698
O	1.87049	-1.72613	-0.984476
H	2.33825	-1.92624	-0.160839
O	0.983598	-0.717208	1.57901
O	2.11329	0.078272	1.12238
C	0.776229	1.73388	-0.022498
O	-4.63164	0.753306	-0.290467
H	-3.77525	0.972952	-0.717665
H	1.16294	2.74212	-0.151956
C	-1.02125	0.135877	0.542764
H	-1.51105	0.06252	1.52243
O	-1.99418	-0.109232	-0.475907
O	-2.65842	-1.32949	-0.14431
H	-3.55876	-1.00411	0.040633
H	-0.279154	-1.91668	0.498668
C	3.02789	0.962624	-0.882054
H	2.78634	1.37077	-1.86751
H	3.55913	1.72682	-0.308226
H	3.67136	0.091843	-1.0097
PCTH-9	X	Y	Z
C	-0.732222	1.33738	-0.197917	-723.624	0.18724
C	0.105395	-0.921891	0.496876
C	1.15331	-0.761372	-0.597568
C	1.65097	0.631378	-0.177236
H	-1.54059	2.05043	-0.327575
H	0.735328	-0.785158	-1.60531
O	2.15192	-1.74064	-0.51267
H	2.51829	-1.71498	0.383277
O	0.776025	-0.449187	1.66893
O	1.86592	0.407784	1.2277
C	0.54998	1.65304	-0.383349
O	-3.86648	1.09927	0.218225
H	-4.15149	0.291362	-0.225074
H	0.841595	2.66329	-0.66085
C	-1.12017	-0.040987	0.245783
H	-1.77474	-0.017852	1.1201
O	-1.90204	-0.636744	-0.833446
O	-2.67995	-1.58576	-0.394335
H	-4.64715	1.45974	0.649808
H	-0.175915	-1.9638	0.674325
C	2.97998	1.06012	-0.763372
H	2.85455	1.25858	-1.83143
H	3.32452	1.97632	-0.276272
H	3.72898	0.278234	-0.635505
TSTH-10	X	Y	Z
C	-1.24647	1.72588	0.395573	-723.551	0.180936
C	-0.473165	-0.654547	0.294284
C	0.404669	-0.186404	-0.866444
C	1.06497	0.997697	-0.137599
H	-2.00607	2.47846	0.586481
H	-0.217868	0.127487	-1.71185
O	1.29258	-1.13939	-1.33644
H	1.88421	-1.69889	-0.564413
O	0.371226	-0.529755	1.44694
O	1.44621	0.38362	1.10474
C	0.014404	2.06078	0.119817
O	2.05237	-2.4761	0.349807
H	1.75356	-1.98752	1.14141
H	0.325617	3.10259	0.101066
C	-1.67288	0.283629	0.47118
O	-2.61803	0.094522	-0.576334
O	-3.18956	-1.20191	-0.389454
H	-4.1237	-0.978394	-0.267438
H	-2.15667	0.069903	1.43345
H	-0.773246	-1.70197	0.209952
C	2.33382	1.53017	-0.767565
H	2.0896	2.01727	-1.71572
H	2.80091	2.26503	-0.106419
H	3.03322	0.714922	-0.956062
RCTH-10	X	Y	Z
C	-1.32184	-1.58778	-0.625018	-723.577	0.186792
C	-0.499743	0.730151	-0.163815
C	0.294754	0.101238	0.97517
C	0.965518	-1.00835	0.145272
H	-2.08353	-2.28551	-0.961148
H	-0.362999	-0.305786	1.74568
O	1.19053	0.973169	1.5916
H	1.77528	1.38845	0.932592
O	0.416466	0.733007	-1.27361
O	1.44112	-0.259294	-0.990433
C	-0.091031	-1.99473	-0.313889
O	2.81033	2.08021	-0.56047
H	2.10273	1.85944	-1.20341
H	0.193276	-3.04017	-0.408533
C	-1.70644	-0.134043	-0.545073
O	-2.72167	-0.047349	0.449959
O	-3.24492	1.28174	0.391698
H	-4.17619	1.10645	0.193353
H	-2.11555	0.214201	-1.50275
H	-0.783928	1.76655	0.033256
C	2.17691	-1.65985	0.776128
H	1.85893	-2.23899	1.64743
H	2.65698	-2.3346	0.062196
H	2.89139	-0.901747	1.09875
PCTH-10	X	Y	Z
C	-1.1036	-1.79125	-0.572706	-723.59	0.186117
C	-0.426648	0.596479	-0.203108
C	0.421984	0.013011	0.957487
C	1.16254	-1.04125	0.096081
H	-1.8298	-2.54484	-0.863366
H	-0.242085	-0.416976	1.71976
O	1.23246	0.982222	1.44053
H	1.78117	2.8599	0.389661
O	0.446925	0.606743	-1.32927
O	1.55761	-0.265058	-1.03553
C	0.16451	-2.10649	-0.307303
O	1.32387	3.20814	-0.384185
H	1.36085	2.49	-1.02933
H	0.518259	-3.13097	-0.393608
C	-1.58487	-0.367059	-0.497024
O	-2.56589	-0.331835	0.528802
O	-3.16285	0.965236	0.485744
H	-4.08965	0.739753	0.31831
H	-2.04249	-0.060673	-1.4475
H	-0.759248	1.62159	-0.023196
C	2.43495	-1.58773	0.709699
H	2.1888	-2.18147	1.59421
H	2.95177	-2.22908	-0.009185
H	3.09214	-0.765042	0.996731
TSTH-1-1	X	Y	Z
C	-0.790189	1.50731	-0.416466	-723.591	0.187898
C	-0.397776	-0.795655	0.745138
C	0.621864	-1.17108	-0.323793
C	1.39445	0.158284	-0.450811
H	-1.44103	1.80109	-1.24887
H	0.176889	-1.47479	-1.27422
O	1.45324	-2.20912	0.12184
H	1.66052	-2.02855	1.05135
O	0.383001	-0.305538	1.80341
O	1.32864	0.778164	0.841839
C	0.614426	1.31893	-0.918921
O	-0.835572	2.58423	0.500001
H	-0.168662	2.39962	1.17857
H	1.11961	2.17619	-1.35399
C	-1.40727	0.226399	0.200612
H	-2.09896	0.537251	0.992766
O	-2.13464	-0.357964	-0.878708
O	-2.83192	-1.49295	-0.369222
H	-3.75208	-1.21131	-0.478494
H	-0.926459	-1.68269	1.11519
C	2.80833	0.0181	-0.973045
H	2.79025	-0.427372	-1.97188
H	3.29065	0.997171	-1.02282
H	3.38431	-0.634955	-0.317156
IMTH-1-1	X	Y	Z
C	-0.813493	1.47377	-0.456919	-723.669	0.190074
C	-0.55263	-0.608521	0.963035
C	0.665865	-1.15243	0.185336
C	1.35682	-0.021203	-0.564267
H	-1.37329	1.80691	-1.33652
H	0.331469	-1.91313	-0.526259
O	1.55911	-1.77158	1.07462
H	1.6745	-1.16895	1.82473
O	-0.15927	0.089476	2.07194
O	1.53124	1.14282	0.248688
C	0.633174	1.23111	-0.858305
O	-0.894127	2.51165	0.488694
H	-0.297676	2.29217	1.2206
H	1.00748	1.85453	-1.66986
C	-1.4928	0.199863	0.06354
H	-2.40707	0.473384	0.604159
O	-1.80023	-0.544055	-1.10883
O	-2.38898	-1.77652	-0.697602
H	-3.29171	-1.67893	-1.03463
H	-1.08895	-1.4903	1.36604
C	2.55471	-0.423812	-1.38394
H	2.24509	-1.07528	-2.20638
H	3.04394	0.461606	-1.79563
H	3.26442	-0.968985	-0.757257
TSTH-1-2	X	Y	Z
C	-0.745131	1.58269	-0.373553	-723.584	0.186672
C	-0.471127	-0.662054	0.825088
C	0.520218	-1.22703	-0.202019
C	1.4037	0.265406	-0.45913
H	-1.46733	2.09803	-1.0129
H	0.116692	-1.60816	-1.14063
O	1.37775	-2.11761	0.346651
H	1.63199	-1.75555	1.21688
O	0.288869	-0.171353	1.842
O	1.67104	0.596353	0.802133
C	0.410348	1.07558	-1.17491
O	-0.391071	2.48757	0.646017
H	0.311709	2.07856	1.17713
H	0.326649	0.981467	-2.25276
C	-1.45985	0.339718	0.226935
H	-2.16931	0.676241	0.99246
O	-2.14541	-0.248626	-0.873726
O	-2.88509	-1.36406	-0.377322
H	-3.79573	-1.05893	-0.503141
H	-1.01271	-1.55111	1.19211
C	2.65279	-0.144293	-1.24919
H	2.37261	-0.575215	-2.21436
H	3.26061	0.746136	-1.42184
H	3.23042	-0.869746	-0.678271
IMTH-1-2	X	Y	Z
C	-0.188495	-0.807496	-0.923714	-723.696	0.188798
C	-1.22001	1.00699	0.264748
C	0.198875	0.785232	0.8963
C	2.15645	-0.651247	0.112113
H	-0.212133	-1.85231	-1.25791
H	0.144261	0.758734	1.98867
O	1.07757	1.82326	0.544668
H	0.709343	2.26754	-0.235452
O	-1.26621	2.05858	-0.597521
O	2.61833	-0.832435	-0.999988
C	0.657816	-0.595142	0.33726
O	0.185731	0.071181	-1.9603
H	1.12413	-0.092833	-2.14144
H	0.396279	-1.37305	1.06667
C	-1.56495	-0.314183	-0.482587
H	-2.25452	-0.139289	-1.31376
O	-2.06347	-1.2862	0.415725
O	-3.31961	-0.823124	0.900727
H	-3.93206	-1.44152	0.474595
H	-2.0106	1.17781	1.01679
C	3.03549	-0.459408	1.31833
H	2.96445	0.591242	1.61977
H	2.69281	-1.07526	2.15517
H	4.06823	-0.699611	1.06572
IMTH-1-3	X	Y	Z
C	1.29013	1.0879	0.330774	-723.583	0.185913
C	0.163888	-0.753668	-1.04113
C	-0.788216	-1.11498	0.095158
C	-1.13296	0.311609	0.544034
H	2.19742	1.2	0.932536
H	-0.330403	-1.70432	0.890196
O	-1.89432	-1.82799	-0.390916
H	-2.26887	-1.33605	-1.1357
O	-0.581799	0.24419	-1.73978
O	-1.35574	0.96693	-0.73045
C	0.071227	0.945198	1.25133
O	1.20807	2.24948	-0.46928
H	0.344788	2.26222	-0.906719
H	-0.195872	1.94457	1.61143
C	1.49089	-0.136988	-0.58667
H	2.06535	0.177196	-1.46143
O	2.32024	-1.16112	0.010583
O	2.01147	-1.40362	1.25484
H	0.329478	0.328453	2.11742
H	0.311163	-1.57964	-1.74255
C	-2.41682	0.447274	1.33775
H	-2.27562	0.011931	2.33101
H	-2.6713	1.50382	1.45599
H	-3.23823	-0.069199	0.840366
TSTH-1-3	X	Y	Z
C	1.46602	0.906504	0.357113	-723.645	0.192492
C	0.065061	-0.526147	-1.23787
C	-0.940974	-1.0447	-0.20511
C	-0.980744	0.233045	0.662884
H	2.43558	0.860763	0.863226
H	-0.628815	-1.93567	0.329361
O	-2.17649	-1.31383	-0.806481
H	-2.43523	-0.545624	-1.33591
O	-0.556839	0.715692	-1.59977
O	-1.19946	1.22215	-0.379968
C	0.376697	0.487393	1.32085
O	1.38216	2.20953	-0.16702
H	0.497216	2.35282	-0.527528
H	0.367696	0.968286	2.30061
C	1.4819	-0.220463	-0.70657
H	2.14509	0.050425	-1.53222
O	2.12641	-1.33095	-0.08823
O	1.425	-1.74628	1.05159
H	0.909936	-0.737552	1.49707
H	0.077308	-1.13623	-2.1443
C	-2.14888	0.333253	1.62134
H	-1.98394	-0.35555	2.45469
H	-2.22652	1.34833	2.01935
H	-3.07904	0.066181	1.11888
TSTH-1-4	X	Y	Z
C	-0.814106	1.368	-0.04381	-723.554	0.181997
C	-0.196029	-1.02271	0.376962
C	0.838307	-0.804519	-0.718278
C	1.49704	0.444676	-0.105352
H	-1.03738	1.15243	-1.84058
H	0.396115	-0.631259	-1.70065
O	1.73124	-1.88018	-0.821531
H	2.11106	-2.03502	0.055666
O	0.546033	-0.803165	1.58493
O	1.73354	-0.040192	1.23228
C	0.52691	1.59647	-0.07466
O	-1.76522	2.32647	0.118204
H	-1.39294	3.19913	-0.058478
H	0.916397	2.61153	-0.100878
C	-1.33917	-0.008858	0.297206
H	-1.83788	0.058283	1.27263
O	-2.29055	-0.388414	-0.68853
O	-3.00206	-1.5034	-0.152971
H	-3.89288	-1.13184	-0.070125
H	-0.585151	-2.04353	0.405011
C	2.84846	0.822076	-0.677467
H	2.71465	1.20429	-1.69309
H	3.30913	1.60296	-0.066106
H	3.50644	-0.046749	-0.710069
PTH-1-4	X	Y	Z
C	-0.83233	1.35275	0.115041	-723.562	0.181072
C	-0.171098	-1.02291	0.475567
C	0.805943	-0.82171	-0.674046
C	1.46014	0.463656	-0.140019
H	-1.04634	1.09648	-2.78381
H	0.314114	-0.692413	-1.63939
O	1.71618	-1.88339	-0.779266
H	2.14913	-1.98649	0.080802
O	0.61728	-0.73843	1.63925
O	1.76732	0.039282	1.20256
C	0.4602	1.59403	-0.127077
O	-1.82632	2.27223	0.162823
H	-1.48191	3.1469	-0.055547
H	0.823029	2.60948	-0.27264
C	-1.33622	-0.036247	0.400789
H	-1.89557	-0.033417	1.34535
O	-2.21502	-0.374229	-0.666729
O	-2.90405	-1.5595	-0.272949
H	-3.81327	-1.23222	-0.205342
H	-0.528873	-2.05214	0.555918
C	2.77356	0.846743	-0.790467
H	2.58175	1.17676	-1.81523
H	3.2409	1.66719	-0.239058
H	3.4528	-0.005724	-0.8153
TSTH-1-5	X	Y	Z
C	-0.887674	1.38893	-0.177512	-723.552	0.184646
C	-0.259115	-0.926768	0.554559
C	0.778392	-0.958387	-0.560058
C	1.47557	0.377553	-0.237985
H	-0.415331	1.35053	-1.38069
H	0.333283	-0.993148	-1.55668
O	1.64523	-2.05361	-0.43727
H	2.02414	-2.03388	0.453368
O	0.478807	-0.454328	1.68824
O	1.67399	0.209037	1.1861
C	0.556594	1.53467	-0.499438
O	-1.62095	2.49818	0.163339
H	-1.09298	3.06232	0.74817
H	0.946536	2.54378	-0.59199
C	-1.40149	0.054392	0.272758
H	-1.99506	0.195312	1.18466
O	-2.24357	-0.44603	-0.769499
O	-2.88325	-1.62038	-0.261384
H	-3.80983	-1.33898	-0.257101
H	-0.642606	-1.92157	0.792992
C	2.85243	0.566253	-0.844502
H	2.75514	0.689343	-1.9259
H	3.32258	1.46208	-0.430113
H	3.48384	-0.298574	-0.639917
IMTH-1-5	X	Y	Z
C	-0.859122	1.36252	0.097162	-723.628	0.189598
C	-0.229095	-0.970722	0.584485
C	0.761004	-0.928723	-0.571966
C	1.42511	0.415583	-0.235143
H	0.381291	1.68256	-1.64179
H	0.277497	-0.937748	-1.55084
O	1.66255	-2.00359	-0.518505
H	2.01299	-2.05158	0.382608
O	0.576743	-0.594623	1.69757
O	1.60726	0.306077	1.18488
C	0.46788	1.57784	-0.546131
O	-1.77139	2.36676	0.163231
H	-1.35063	3.21629	-0.014909
H	0.925669	2.50507	-0.170512
C	-1.38631	0.014144	0.387916
H	-2.03763	0.031329	1.2714
O	-2.16836	-0.404275	-0.748228
O	-2.80118	-1.64011	-0.397203
H	-3.73112	-1.37172	-0.367136
H	-0.597953	-1.97987	0.781996
C	2.79867	0.630067	-0.842295
H	2.70846	0.749358	-1.92559
H	3.25316	1.53378	-0.427025
H	3.44448	-0.223624	-0.636371
TSTH-1-1-1	X	Y	Z
C	-0.731842	1.37713	-0.695526	-723.653	0.188064
C	-0.971251	-0.304607	1.19205
C	0.830665	-1.18445	0.415941
C	1.43876	-0.166	-0.502482
H	-1.18405	1.63364	-1.65982
H	0.473661	-2.11555	-0.017553
O	1.48087	-1.36593	1.5798
H	1.63932	-0.492088	1.97927
O	-0.551742	0.499176	2.04071
O	1.63603	1.09404	0.129172
C	0.728514	1.03983	-0.969544
O	-0.84998	2.51044	0.121545
H	-0.5064	2.25887	0.996215
H	1.1319	1.51115	-1.86618
C	-1.54348	0.208344	-0.121897
H	-2.56996	0.561282	0.056938
O	-1.54755	-0.792942	-1.13064
O	-2.3659	-1.86706	-0.669879
H	-3.11116	-1.81872	-1.28696
H	-1.2641	-1.32653	1.4863
C	2.62094	-0.696026	-1.28742
H	3.35686	-1.13378	-0.606962
H	2.2937	-1.46507	-1.99286
H	3.0925	0.11969	-1.84077
IMTH-1-1-1	X	Y	Z
C	-0.629965	1.35499	-0.721172	-723.653	0.187768
C	-1.21662	-0.255095	1.18472
C	0.93706	-1.30998	0.320885
C	1.5712	-0.203858	-0.451554
H	-0.989563	1.61071	-1.724
H	0.683787	-2.24511	-0.165975
O	1.35871	-1.45531	1.59745
H	1.45227	-0.570029	1.98955
O	-0.812861	0.497462	2.05341
O	1.64125	1.00214	0.311685
C	0.847117	1.01868	-0.870458
O	-0.787863	2.50839	0.065834
H	-0.508999	2.27585	0.967023
H	1.31809	1.58695	-1.67396
C	-1.56008	0.245321	-0.209117
H	-2.57283	0.674915	-0.168765
O	-1.52347	-0.795102	-1.17188
O	-2.51223	-1.75334	-0.800044
H	-3.14516	-1.66874	-1.52881
H	-1.45257	-1.31129	1.39752
C	2.85097	-0.577635	-1.17107
H	3.5566	-1.02026	-0.462058
H	2.64302	-1.30941	-1.95678
H	3.30891	0.307978	-1.61884
TSTH-1-1-2	X	Y	Z
C	-1.34046	1.21144	-0.60248	-723.645	0.184755
C	0.182889	-0.32916	1.65084
C	1.10756	-0.811794	0.53477
C	1.0492	-0.059881	-0.79881
H	-1.99215	1.59776	-1.40032
H	0.912457	-1.8716	0.347751
O	2.43212	-0.710581	1.02609
H	2.55028	0.201817	1.33102
O	0.381421	0.730728	2.20542
O	1.17296	1.35781	-0.665898
C	-0.00561	0.857546	-1.27939
O	-1.23854	2.25869	0.322023
H	-0.436659	2.13448	0.853457
H	-0.018401	1.0005	-2.36039
C	-2.00433	0.007927	0.007345
H	-2.66107	0.08174	0.871331
O	-2.00678	-1.1044	-0.719249
O	-1.69452	-2.26686	0.172912
H	-2.34981	-2.90143	-0.156891
H	-0.61149	-1.01257	1.99156
C	1.95868	-0.682676	-1.83477
H	2.04174	-0.024575	-2.70232
H	2.95284	-0.843889	-1.41258
H	1.55145	-1.64573	-2.15806
PTH-1-1-2	X	Y	Z
C	0.739985	1.23653	1.09375	-723.709	0.184311
C	-0.231334	-0.319404	-1.77168
C	-1.45321	-0.231853	-0.873493
C	-1.00723	-0.742195	0.519731
H	1.17031	1.54814	2.06356
H	-2.20613	-0.945451	-1.23804
O	-2.00794	1.04215	-0.890636
H	-1.33973	1.64534	-1.25905
O	0.252582	0.676877	-2.25777
O	-1.36318	0.052676	1.64439
C	0.02332	-0.085316	1.3546
O	-0.087392	2.24667	0.591816
H	-0.995691	2.05755	0.880559
H	0.569919	-0.73671	2.03736
C	1.92323	1.08732	0.156579
H	2.10448	1.947	-0.512824
O	2.64449	0.114231	0.154
O	1.76186	-2.5104	-0.410152
H	2.26121	-1.74148	-0.056381
H	0.223938	-1.31652	-1.91326
C	-1.2416	-2.22197	0.702959
H	-0.845804	-2.55942	1.66302
H	-2.317	-2.42354	0.676476
H	-0.747801	-2.7912	-0.089292
TSTH-1-1-3	X	Y	Z	*
C	-0.746011	1.54779	-0.371223	-724.208	0.181684
C	-0.514459	-0.502646	0.942476
C	0.652161	-1.14942	0.199419
C	1.3707	-0.024862	-0.557936
H	-1.31262	1.97761	-1.2029
H	0.290034	-1.88711	-0.524401
O	1.51819	-1.78137	1.09497
H	1.43946	-1.31556	1.94304
O	-0.423005	-0.240674	2.13568
O	1.60609	1.1289	0.249735
C	0.681126	1.25505	-0.8287
O	-0.756723	2.4869	0.665952
H	-0.098519	2.21491	1.32453
H	1.04743	1.86438	-1.65407
C	-1.48232	0.249824	0.047261
H	-2.41137	0.492177	0.572939
O	-1.71637	-0.414097	-1.18179
O	-2.43658	-1.61453	-0.921516
H	-3.30586	-1.40618	-1.29683
H	-1.42018	-2.11943	1.13363
C	2.5341	-0.472661	-1.4011
H	3.23295	-1.04241	-0.783898
H	2.18453	-1.11198	-2.21684
H	3.04955	0.394068	-1.82063
PTH-1-1-3	X	Y	Z	*
C	-0.748308	1.59834	-0.277822	-723.718	0.179864
C	-0.577905	-0.623345	0.831748
C	0.637415	-1.14378	0.083279
C	1.39547	0.062794	-0.468963
H	-1.26895	2.07552	-1.11399
H	0.300692	-1.76531	-0.756567
O	1.46242	-1.89881	0.923473
H	1.15864	-1.75586	1.83371
O	-0.724672	-0.815883	2.01593
O	1.53757	1.1201	0.484204
C	0.708855	1.35865	-0.653623
O	-0.835912	2.46981	0.818205
H	-0.151613	2.21695	1.45613
H	1.1342	2.06089	-1.36955
C	-1.48661	0.275008	0.015466
H	-2.42074	0.469175	0.553708
O	-1.71569	-0.291187	-1.26422
O	-2.20521	-1.61462	-1.06284
H	-3.14128	-1.51962	-1.29583
C	2.63832	-0.271152	-1.24854
H	3.29137	-0.896214	-0.634914
H	2.37676	-0.822429	-2.15638
H	3.16945	0.642529	-1.52352
TSTH-1-1-4	X	Y	Z	*
C	-0.772934	1.52062	-0.415659	-724.205	0.185497
C	-0.560634	-0.592599	0.873376
C	0.657343	-1.14944	0.169146
C	1.37456	-0.010273	-0.55816
H	-1.32499	1.93327	-1.26627
H	0.345919	-1.89957	-0.565491
O	1.52747	-1.77408	1.07694
H	1.58379	-1.20117	1.85677
O	-0.392533	-0.184436	2.18087
O	1.56229	1.13481	0.278549
C	0.670165	1.26011	-0.828837
O	-0.827085	2.47562	0.611701
H	-0.186004	2.21633	1.29143
H	1.05444	1.89127	-1.62951
C	-1.48896	0.222097	0.015682
H	-2.41284	0.476756	0.547206
O	-1.75723	-0.458078	-1.20025
O	-2.37749	-1.70002	-0.867602
H	-3.23723	-1.60221	-1.30291
H	-1.00084	-1.19799	1.90301
C	2.56978	-0.417456	-1.37822
H	3.26118	-0.993621	-0.758646
H	2.25445	-1.03983	-2.22079
H	3.08288	0.467791	-1.76042
IMTH-1-1-4	X	Y	Z	*
C	-0.764103	1.46232	-0.55153	-724.265	0.190606
C	-0.596247	-0.528195	0.943115
C	0.647778	-1.11477	0.335377
C	1.3557	-0.100005	-0.56861
H	-1.33552	1.85452	-1.39921
H	0.361265	-1.96975	-0.288444
O	1.54452	-1.59494	1.30886
H	1.57884	-0.945887	2.02481
O	-0.381885	0.033473	2.17348
O	1.60166	1.15687	0.071575
C	0.655674	1.12827	-0.99878
O	-0.7455	2.4559	0.448254
H	0.059756	2.31192	0.970191
H	1.00421	1.62232	-1.90503
C	-1.4862	0.211404	-0.00661
H	-2.42742	0.526933	0.4679
O	-1.74609	-0.576268	-1.15746
O	-2.413	-1.76498	-0.73177
H	-3.23368	-1.70477	-1.24232
H	-1.17447	0.492509	2.47912
C	2.5065	-0.644834	-1.37104
H	3.2128	-1.14457	-0.703225
H	2.14254	-1.37261	-2.10228
H	3.01952	0.163828	-1.89649
TSTH-1-1-5	X	Y	Z	*
C	-0.593731	1.48009	-0.36648	-724.198	0.185499
C	-0.433231	-1.16776	-0.18641
C	1.06079	-1.08997	-0.518289
C	1.71724	0.248446	-0.22649
H	-0.835156	1.73759	-1.40567
H	1.19587	-1.29019	-1.58838
O	1.7264	-2.12838	0.165328
H	1.42223	-2.09227	1.08571
O	-0.628913	-1.39912	1.22183
O	1.3528	0.856623	1.01786
C	0.902531	1.47141	-0.18751
O	-1.18508	2.4913	0.418855
H	-0.902629	2.36429	1.33501
H	1.37837	2.42591	-0.415118
C	-1.21121	0.116806	-0.084548
H	-1.15936	-0.178993	1.1929
O	-2.52014	0.146213	-0.542036
O	-3.12031	-1.13168	-0.422974
H	-3.58561	-1.05802	0.425924
H	-0.922505	-1.94479	-0.777657
C	3.18461	0.328526	-0.561909
H	3.72484	-0.458966	-0.031513
H	3.33986	0.189404	-1.63615
H	3.58399	1.301	-0.26615
IMTH-1-1-5	X	Y	Z	*
C	-0.640669	1.51823	-0.535222	-724.269	0.191123
C	-0.383484	-1.11164	-0.245415
C	1.08991	-0.958869	-0.63394
C	1.67905	0.346028	-0.122491
H	-0.7151	1.95552	-1.53995
H	1.16897	-0.954152	-1.72871
O	1.82094	-2.07285	-0.176416
H	1.41679	-2.36307	0.654752
O	-0.494375	-1.50401	1.14019
O	1.09351	0.825447	1.10351
C	0.813735	1.53403	-0.110346
O	-1.37954	2.40777	0.283155
H	-1.45284	2.03055	1.16947
H	1.27672	2.51904	-0.157944
C	-1.18156	0.111345	-0.530939
H	-0.155746	-0.758689	1.6636
O	-2.51883	0.086656	-0.245397
O	-3.01978	-1.24005	-0.209262
H	-2.70703	-1.54886	0.661631
H	-0.792392	-1.96386	-0.79437
C	3.17404	0.482403	-0.215861
H	3.65462	-0.323376	0.342644
H	3.49299	0.408134	-1.25989
H	3.49145	1.44601	0.187757
TSTH-2-1	X	Y	Z
C	-0.807966	1.15047	1.14075	-723.604	0.187478
C	-0.444693	-1.23202	0.398587
C	0.372092	-0.739565	-0.789149
C	1.23547	0.284198	-0.036945
H	-1.32263	1.88409	1.74891
H	-0.235301	-0.304299	-1.58301
O	1.12978	-1.78034	-1.3465
H	1.59922	-2.22757	-0.627508
O	0.56003	-1.46938	1.37651
O	1.55781	-0.417856	1.18098
C	0.417298	1.53378	0.36469
O	0.097609	2.35019	-0.745679
H	-0.720353	2.00863	-1.13488
H	1.06161	2.13741	1.0163
C	-1.41855	-0.174033	0.91049
H	-2.08703	-0.548989	1.69052
O	-2.0832	0.507273	-0.115336
O	-2.94502	-0.670925	-1.02004
H	-3.78774	-0.190628	-1.00751
H	-0.937287	-2.18749	0.205725
C	2.53614	0.670159	-0.709515
H	2.31843	1.30874	-1.56864
H	3.16377	1.2285	-0.009095
H	3.07251	-0.217982	-1.04374
PTH-2-1	X	Y	Z
C	-0.679882	1.46722	0.920326	-723.65	0.188325
C	-0.642547	-1.0679	0.617667
C	0.148536	-0.834631	-0.666535
C	1.21534	0.10689	-0.085098
H	-0.904147	2.28766	1.59753
H	-0.432693	-0.38164	-1.47039
O	0.681314	-2.03654	-1.15111
H	1.10201	-2.49686	-0.410502
O	0.397212	-1.39033	1.53359
O	1.48343	-0.473948	1.21075
C	0.640665	1.51931	0.171504
O	0.502325	2.26742	-1.01635
H	-0.346428	2.03863	-1.41924
H	1.37298	2.04497	0.793789
C	-1.35902	0.175726	1.10063
H	-2.0581	0.050056	1.92395
O	-1.78738	1.09171	0.091767
O	-2.99764	-0.885122	-1.24979
H	-3.27049	0.035695	-1.06891
H	-1.29282	-1.94421	0.560598
C	2.52188	0.168043	-0.849783
H	2.36428	0.684013	-1.79912
H	3.26305	0.72502	-0.269601
H	2.8984	-0.836915	-1.04119
TSTH-2-2	X	Y	Z
C	1.11868	1.08931	-0.65212	-723.578	0.185245
C	0.490144	-1.31509	-0.079495
C	-0.465888	-0.626128	0.892996
C	-1.21173	0.245869	-0.130241
H	1.7234	1.76508	-1.25951
H	0.040679	-0.039696	1.66293
O	-1.28714	-1.55337	1.5477
H	-1.63922	-2.16314	0.883325
O	-0.423652	-1.75473	-1.07337
O	-1.27213	-0.600794	-1.30592
C	-0.346434	1.45958	-0.541408
O	-0.527561	2.58342	0.298521
H	-0.086776	2.4356	1.14491
H	-0.718524	1.77758	-1.52319
C	1.53692	-0.384972	-0.712746
H	1.76104	-0.747846	-1.7217
O	2.77237	-0.398061	-0.002455
O	2.50663	0.370779	1.13548
H	1.75241	1.15045	0.533079
H	0.96205	-2.20956	0.336494
C	-2.62536	0.637957	0.24553
H	-2.61779	1.27512	1.13174
H	-3.0872	1.19421	-0.574643
H	-3.21626	-0.254952	0.451853
IMTH-2-2	X	Y	Z
C	0.828228	1.48289	-0.28029	-723.633	0.191842
C	0.740428	-1.07355	-0.162018
C	-0.350021	-0.733151	0.851159
C	-1.27277	0.040053	-0.105482
H	1.23643	2.31527	-0.857939
H	0.003431	-0.123077	1.68585
O	-0.929079	-1.88598	1.39551
H	-1.13519	-2.49062	0.668353
O	-0.040905	-1.63311	-1.20342
O	-1.12936	-0.686049	-1.35641
C	-0.706634	1.45728	-0.38035
O	-1.27515	2.44701	0.450675
H	-0.89972	2.38722	1.33783
H	-1.029	1.71469	-1.39393
C	1.48713	0.167395	-0.68785
H	1.59201	0.068059	-1.77154
O	2.85751	0.157477	-0.210442
O	2.90546	0.076107	1.08995
H	1.10197	1.6544	0.768806
H	1.4271	-1.85335	0.17731
C	-2.74147	0.051111	0.263922
H	-2.88828	0.545778	1.22584
H	-3.31155	0.597387	-0.491859
H	-3.11439	-0.97158	0.329796
TSTH-2-3	X	Y	Z
C	-0.465254	1.63033	0.176075	-723.552	0.181972
C	-0.821827	-0.835898	0.36086
C	0.210321	-0.927056	-0.755575
C	1.32357	-0.124216	-0.052683
H	-0.814866	2.65937	0.159099
H	-0.129372	-0.477658	-1.68958
O	0.595129	-2.24843	-1.01676
H	0.876704	-2.64877	-0.181562
O	-0.052931	-1.05309	1.55013
O	1.33586	-0.780266	1.21704
C	0.858565	1.3372	0.067259
O	1.79908	2.24052	-0.333927
H	1.41917	3.12783	-0.341542
H	1.28141	1.44691	1.80687
C	-1.47081	0.549958	0.417598
H	-1.99026	0.670046	1.37831
O	-2.42812	0.679135	-0.63824
O	-3.51109	-0.200888	-0.329286
H	-4.23823	0.427133	-0.210018
H	-1.57749	-1.62295	0.30382
C	2.7167	-0.26324	-0.629983
H	2.76344	0.228924	-1.60316
H	3.44413	0.211407	0.03186
H	2.95437	-1.32049	-0.747085
PTH-2-3	X	Y	Z
C	-0.439249	1.64575	0.105828	-723.563	0.181671
C	-0.813392	-0.814867	0.402901
C	0.198981	-1.00331	-0.715937
C	1.30925	-0.118703	-0.12144
H	-0.768304	2.68108	0.148556
H	-0.1582	-0.654643	-1.68546
O	0.595796	-2.34113	-0.843266
H	0.853571	-2.66038	0.033649
O	-0.019499	-0.970833	1.58162
O	1.3468	-0.599956	1.23177
C	0.841036	1.32849	-0.118861
O	1.84438	2.21879	-0.302602
H	1.50611	3.11992	-0.22812
H	0.10548	1.36675	2.871
C	-1.45299	0.576349	0.366814
H	-1.98332	0.752768	1.31297
O	-2.39528	0.646869	-0.707296
O	-3.48005	-0.221025	-0.369371
H	-4.21171	0.408967	-0.299869
H	-1.57538	-1.59785	0.42385
C	2.69211	-0.314532	-0.708212
H	2.72461	0.109421	-1.71471
H	3.43765	0.196836	-0.097294
H	2.91781	-1.37956	-0.757986
TSTH-2-4	X	Y	Z
C	-0.570339	1.59849	0.20379	-723.549	0.181958
C	-0.763755	-0.851923	-0.215798
C	0.590365	-0.726972	-0.919304
C	1.34488	-0.048328	0.233574
H	-0.995774	2.59499	0.275645
H	0.560154	-0.119152	-1.82587
O	1.10547	-1.98085	-1.2673
H	1.03998	-2.55678	-0.491705
O	-0.364552	-1.46058	1.00361
O	0.835785	-0.741877	1.39675
C	0.915988	1.43454	0.360076
O	1.61336	2.26431	-0.558131
H	1.15104	2.26231	-1.40508
H	1.23314	1.77337	1.35417
C	-1.36674	0.525301	-0.005165
H	-1.87056	0.21674	1.77115
O	-2.65271	0.750657	-0.442179
O	-3.48266	-0.3509	-0.09945
H	-3.76234	-0.117898	0.803325
H	-1.46223	-1.53737	-0.697315
C	2.85068	-0.205973	0.222608
H	3.27458	0.353793	-0.612842
H	3.26778	0.191632	1.15222
H	3.12011	-1.25859	0.131189
PTH-2-4	X	Y	Z
C	-0.581346	1.60427	0.151364	-723.555	0.181341
C	-0.745934	-0.811859	-0.38346
C	0.675341	-0.728254	-0.939554
C	1.31997	-0.050302	0.275832
H	-1.02768	2.58108	0.314044
H	0.755993	-0.134141	-1.85189
O	1.19267	-1.99985	-1.21496
H	1.03808	-2.55819	-0.439026
O	-0.494989	-1.41189	0.88627
O	0.68694	-0.729163	1.38739
C	0.902188	1.43913	0.342292
O	1.64571	2.23031	-0.573815
H	1.18016	2.26188	-1.41779
H	1.18212	1.80175	1.33894
C	-1.33361	0.564741	-0.213835
H	-1.81045	0.169764	2.50516
O	-2.67146	0.744013	-0.467968
O	-3.38547	-0.391327	0.018418
H	-3.57742	-0.129566	0.934832
H	-1.40113	-1.49179	-0.929163
C	2.81671	-0.226381	0.4172
H	3.32599	0.336	-0.367658
H	3.1422	0.159059	1.38761
H	3.08507	-1.28069	0.343219
TSTH-2-5	X	Y	Z
C	-0.519001	1.54889	0.686305	-723.55	0.184659
C	-0.775049	-0.921781	0.348081
C	0.258683	-0.835502	-0.769701
C	1.33776	-0.047012	-0.000571
H	-0.897633	2.55743	0.819953
H	-0.098176	-0.296813	-1.65061
O	0.687597	-2.10703	-1.17848
H	0.962679	-2.59487	-0.38875
O	0.012286	-1.29807	1.47343
O	1.33907	-0.726607	1.26786
C	0.861986	1.38398	0.197123
O	1.45477	2.34403	-0.586076
H	0.769369	2.9074	-0.971764
H	0.560816	1.50745	1.46246
C	-1.49082	0.410655	0.598266
H	-2.13	0.333189	1.48474
O	-2.32354	0.723333	-0.527045
O	-3.41907	-0.212322	-0.500863
H	-3.42529	-0.510493	-1.42179
H	-1.49802	-1.72551	0.189912
C	2.74241	-0.128599	-0.562212
H	2.78841	0.404211	-1.51353
H	3.4455	0.339662	0.130521
H	3.0176	-1.17216	-0.715521
IMTH-2-5	X	Y	Z
C	-0.67479	1.2614	1.19124	-723.626	0.190426
C	-0.515985	-1.10754	0.368169
C	0.418216	-0.745253	-0.783966
C	1.30949	0.256557	-0.016719
H	-1.33539	2.13313	1.25064
H	-0.079198	-0.271962	-1.63178
O	1.11439	-1.86942	-1.25226
H	1.52358	-2.30343	-0.489694
O	0.398924	-1.33457	1.43991
O	1.53889	-0.444862	1.21594
C	0.486023	1.49095	0.268122
O	0.301386	2.24291	-0.862216
H	-0.443128	2.84516	-0.747208
H	-0.295384	1.05649	2.19625
C	-1.47825	0.030894	0.742101
H	-2.16631	-0.300289	1.52998
O	-2.23243	0.461083	-0.382821
O	-3.05816	-0.639494	-0.774059
H	-2.81432	-0.738397	-1.7063
H	-1.0355	-2.05408	0.201986
C	2.65598	0.549406	-0.647557
H	2.50348	1.15814	-1.5417
H	3.2758	1.11065	0.055576
H	3.1583	-0.378982	-0.921969
TSTH-2-6	X	Y	Z
C	-0.608206	1.52145	0.601784	-723.548	0.184785
C	-0.722263	-0.943008	0.01931
C	0.506071	-0.728548	-0.867475
C	1.37782	0.016446	0.15494
H	-1.10068	2.48525	0.683917
H	0.294401	-0.135121	-1.76034
O	1.06056	-1.94531	-1.28718
H	1.16713	-2.50703	-0.505929
O	-0.124641	-1.44533	1.21095
O	1.13123	-0.721302	1.36762
C	0.878142	1.46826	0.360946
O	1.2378	2.27877	-0.757042
H	0.522836	2.26106	-1.40498
H	1.42925	1.88626	1.2102
C	-1.45181	0.351189	0.281357
H	-1.22389	0.755149	1.49611
O	-2.57593	0.638693	-0.464989
O	-3.52767	-0.416155	-0.310411
H	-4.10786	-0.058103	0.379551
H	-1.40088	-1.71469	-0.350025
C	2.87045	-0.022018	-0.104771
H	3.10561	0.605351	-0.966593
H	3.40346	0.368208	0.76699
H	3.19852	-1.04386	-0.296974
PTH-2-6	X	Y	Z
C	-0.129388	1.84207	0.709588	-723.688	0.187009
C	-0.817232	-0.57805	0.649857
C	0.103476	-0.93249	-0.524087
C	1.324	-0.109367	-0.068349
H	-0.457583	2.85828	0.477887
H	-0.289213	-0.623302	-1.49312
O	0.369302	-2.3038	-0.567883
H	0.673867	-2.58297	0.307587
O	0.044344	-0.711537	1.77993
O	1.4083	-0.457491	1.31678
C	1.04038	1.4045	-0.191167
O	0.750629	1.62332	-1.56008
H	0.639308	2.56552	-1.72877
H	1.94803	1.94462	0.110929
C	-1.26713	0.872064	0.516108
H	0.196186	1.79439	1.75444
O	-2.39774	1.18622	0.210668
O	-3.1595	-1.17685	-1.05763
H	-3.40736	-0.273242	-0.768592
H	-1.65064	-1.27497	0.774962
C	2.63795	-0.491336	-0.719112
H	2.63895	-0.127701	-1.74913
H	3.46879	-0.029737	-0.178545
H	2.76463	-1.5741	-0.718896
TSTH-1-O2-a	X	Y	Z
C	-0.843779	-0.270728	1.50822	-873.796	0.195931
C	-0.45907	-1.08324	-0.86377
C	0.550571	0.012798	-1.17293
C	1.33921	-0.04536	0.149297
H	-1.51407	0.409828	2.04539
H	0.086413	0.97971	-1.36404
O	1.34999	-0.315914	-2.27705
H	1.73743	-1.18889	-2.11912
O	0.352734	-2.12089	-0.290148
O	1.54891	-1.48142	0.256418
C	0.496631	0.379513	1.31556
O	-0.727843	-1.42211	2.33005
H	-0.130199	-2.04614	1.89221
H	1.00953	0.701219	2.21763
C	-1.50387	-0.627571	0.163682
H	-2.24774	-1.41483	0.335646
O	-2.1428	0.561471	-0.275107
O	-2.76657	0.260158	-1.52505
H	-3.69383	0.448174	-1.31875
H	-0.911053	-1.4957	-1.76805
O	-0.158436	2.43643	0.867319
O	0.398922	3.01549	-0.044831
C	2.70615	0.604634	0.128184
H	2.57905	1.6901	0.085496
H	3.25722	0.348076	1.03676
H	3.2729	0.28246	-0.745498
RCTH-1-O2-a	X	Y	Z
C	0.186638	-1.06383	-1.3979	-873.797	0.195072
C	-0.413298	-0.878303	1.0653
C	-0.425574	0.644514	1.0415
C	-1.16528	0.826505	-0.298328
H	1.08275	-1.16215	-2.01912
H	0.57396	1.0804	1.04534
O	-1.14007	1.17304	2.12616
H	-2.01338	0.755824	2.14217
O	-1.75904	-1.21214	0.696337
O	-2.27301	-0.101669	-0.104113
C	-0.323503	0.344219	-1.43762
O	-0.754791	-1.97909	-1.9436
H	-1.59043	-1.87127	-1.46648
H	-0.355263	0.866523	-2.38814
C	0.565751	-1.46754	0.040037
H	0.588348	-2.56193	0.110995
O	1.86761	-0.932303	0.235189
O	2.25539	-1.22713	1.57747
H	3.02623	-1.79427	1.42941
H	-0.254713	-1.27476	2.0702
O	2.24141	1.69008	-1.22203
O	2.66059	1.93405	-0.125663
C	-1.77439	2.19467	-0.526233
H	-0.971218	2.91474	-0.707099
H	-2.42805	2.17317	-1.402
H	-2.34499	2.51354	0.346142
IMTH-1-O2-a	X	Y	Z
C	-0.506208	1.20235	1.03286	-873.845	0.200019
C	-1.0366	-1.10171	0.112475
C	0.108388	-1.05719	-0.891119
C	1.1842	-0.465193	0.034432
H	-0.80969	2.24219	0.874065
H	-0.104723	-0.426768	-1.75541
O	0.443285	-2.33883	-1.34977
H	0.559615	-2.91614	-0.581773
O	-0.410677	-1.64781	1.2789
O	0.991502	-1.22484	1.24049
C	0.866495	1.00827	0.363463
O	-0.412246	1.02318	2.42461
H	-0.152466	0.109489	2.60996
H	1.63959	1.43126	1.01123
C	-1.59032	0.293076	0.426513
H	-2.42554	0.224929	1.13443
O	-2.00423	0.938241	-0.766109
O	-2.99898	0.10186	-1.36114
H	-3.73959	0.721284	-1.43449
H	-1.81802	-1.80591	-0.180373
O	0.865619	1.77006	-0.866435
O	2.03423	2.2942	-1.12008
C	2.61863	-0.672466	-0.406833
H	2.82497	-0.06218	-1.28932
H	3.30249	-0.368483	0.389835
H	2.78783	-1.72097	-0.652664
TSTH-1-O2-s	X	Y	Z
C	-0.009635	-1.57079	-0.141331	-873.792	0.196014
C	1.33829	0.422587	0.725662
C	0.8328	1.3553	-0.370103
C	-0.647508	0.889094	-0.36328
H	0.149585	-2.45935	-0.758661
H	1.32097	1.20187	-1.33332
O	0.979892	2.7	-0.010312
H	0.636668	2.8121	0.888209
O	0.3575	0.607387	1.7458
O	-0.91657	0.831783	1.05834
C	-0.700563	-0.495808	-0.940306
O	-0.734017	-2.00648	0.987846
H	-1.05365	-1.23407	1.47733
H	-0.713382	-0.5795	-2.02249
C	1.38712	-1.04659	0.284777
H	1.76831	-1.6808	1.09471
O	2.19371	-1.17994	-0.877239
O	3.49465	-0.689325	-0.552212
H	4.02839	-1.49099	-0.654517
H	2.28821	0.758952	1.14677
O	-2.79624	-1.07987	-0.790357
O	-3.35968	-0.707255	0.219818
C	-1.62992	1.86935	-0.97677
H	-1.51116	1.86477	-2.06382
H	-2.65449	1.58187	-0.734841
H	-1.43686	2.8758	-0.604727
RCTH-1-O2-s	X	Y	Z
C	0.124826	-1.53623	-0.524349	-873.797	0.194836
C	1.26689	0.285464	0.83939
C	0.970429	1.36969	-0.189536
C	-0.479983	0.953802	-0.516691
H	0.394387	-2.31774	-1.24069
H	1.62786	1.33325	-1.05854
O	1.05124	2.6499	0.375918
H	0.514047	2.65748	1.18146
O	0.101776	0.325443	1.67263
O	-1.00778	0.772097	0.829199
C	-0.4834	-0.362044	-1.22912
O	-0.777949	-2.15163	0.385657
H	-1.07593	-1.48009	1.01727
H	-1.02804	-0.488894	-2.15736
C	1.41291	-1.10638	0.209383
H	1.65167	-1.85328	0.976743
O	2.42047	-1.08904	-0.791922
O	3.63706	-0.684724	-0.162346
H	4.18316	-1.47472	-0.286453
H	2.11497	0.543626	1.47716
O	-3.40134	-0.633469	-0.498164
O	-3.61447	-0.878199	0.654513
C	-1.3238	2.02158	-1.18325
H	-0.964526	2.17222	-2.20503
H	-2.36901	1.70566	-1.22253
H	-1.24794	2.96421	-0.6409
IMTH-1-O2-s	X	Y	Z
C	0.028218	-1.58465	0.051145	-873.843	0.200911
C	1.26876	0.565112	0.681765
C	0.610699	1.37402	-0.428741
C	-0.818717	0.807612	-0.27898
H	0.217811	-2.50341	-0.513769
H	1.04385	1.19805	-1.41425
O	0.673891	2.74755	-0.165414
H	0.394642	2.89315	0.750292
O	0.354459	0.752726	1.75759
O	-0.979567	0.806914	1.15393
C	-0.807484	-0.633172	-0.824335
O	-0.609122	-1.9756	1.23234
H	-1.01699	-1.20262	1.65132
H	-0.382244	-0.6213	-1.83422
C	1.39549	-0.922886	0.331583
H	1.87942	-1.46841	1.15028
O	2.1266	-1.07825	-0.877524
O	3.40618	-0.476033	-0.684301
H	3.99056	-1.24363	-0.771784
H	2.21935	0.994954	1.00463
O	-2.12369	-1.17581	-1.036
O	-2.89786	-1.02288	0.007109
C	-1.91368	1.67295	-0.873342
H	-1.88223	1.59988	-1.96455
H	-2.89332	1.33834	-0.529862
H	-1.75762	2.71216	-0.584441
TSTH-1-O2-1	X	Y	Z
C	0.629019	1.504	-0.160169	-873.799	0.194259
C	0.566337	-1.02418	-0.710571
C	-0.54596	-1.13791	0.316527
C	-1.43507	-0.004826	-0.158255
H	1.1962	2.09608	0.564483
H	-0.11832	-0.643879	1.48674
O	-1.19414	-2.33858	0.445873
H	-0.557533	-3.0459	0.610023
O	-0.154335	-0.86269	-1.92649
O	-1.2433	0.037128	-1.59349
C	-0.796385	1.29178	0.40799
O	0.540876	2.27412	-1.3421
H	-0.015988	1.79292	-1.97191
H	-1.40261	2.1639	0.14443
C	1.43984	0.20911	-0.448578
H	2.04504	0.40726	-1.34049
O	2.30113	-0.043426	0.652202
O	3.21342	-1.0579	0.224318
H	4.05633	-0.584074	0.277214
H	1.17893	-1.92219	-0.82964
O	-0.85174	1.21519	1.81995
O	0.10484	0.290339	2.22972
C	-2.90965	-0.146065	0.14131
H	-3.46148	0.664136	-0.342485
H	-3.27513	-1.10479	-0.228823
H	-3.06829	-0.088391	1.22105
IMTH-1-O2-1	X	Y	Z
C	0.572029	-1.22114	0.867757	-873.816	0.198784
C	0.551745	1.282	0.362147
C	-0.455027	1.02744	-0.714021
C	-1.42902	0.138697	-0.005985
H	1.13969	-2.10021	0.553103
H	0.236699	-0.938077	-2.21946
O	-0.965336	2.02584	-1.47277
H	-0.278968	2.67214	-1.68336
O	-0.256581	1.4806	1.53607
O	-1.48599	0.725402	1.32624
C	-0.81055	-1.26607	0.170741
O	0.400975	-1.32714	2.26757
H	-0.131803	-0.577841	2.57177
H	-1.47492	-1.845	0.822804
C	1.42584	0.039398	0.568712
H	2.08165	0.18819	1.43399
O	2.22062	-0.181954	-0.586776
O	3.12444	0.925448	-0.664578
H	3.97589	0.476876	-0.556384
H	1.15349	2.1861	0.234391
O	-0.828152	-1.99316	-1.05061
O	0.382621	-1.78368	-1.76319
C	-2.83817	0.111861	-0.554188
H	-3.48873	-0.436781	0.131778
H	-3.21442	1.12843	-0.674915
H	-2.8404	-0.397684	-1.52035
TSTH-1-O2-2	X	Y	Z
C	-1.00829	0.868864	0.722558	-873.796	0.194191
C	0.023449	-1.401	0.434967
C	0.890144	-0.933531	-0.727405
C	1.39071	0.379386	-0.105715
H	-1.74863	1.58104	-0.084121
H	0.331518	-0.782702	-1.65169
O	1.93914	-1.83069	-0.977667
H	2.3849	-2.01458	-0.138275
O	0.844722	-1.1467	1.57259
O	1.7134	-0.020462	1.23031
C	0.248083	1.39773	-0.011249
O	-1.14273	1.20486	2.03741
H	-0.771123	2.08177	2.20315
H	0.594143	2.31537	0.491695
C	-1.29474	-0.613959	0.546103
H	-1.87699	-0.967729	1.40475
O	-2.04654	-0.739802	-0.649886
O	-2.33885	-2.13293	-0.786293
H	-3.29526	-2.10085	-0.932947
H	-0.158752	-2.47782	0.407764
O	-0.228105	1.68786	-1.30881
O	-1.4366	2.34635	-1.09112
C	2.63452	0.975465	-0.732891
H	2.38283	1.37104	-1.72051
H	3.00982	1.79352	-0.112053
H	3.40882	0.215344	-0.838251
IMTH-1-O2-2	X	Y	Z
C	-0.967222	0.668644	0.737845	-873.838	0.198948
C	0.014157	-1.54343	0.239237
C	0.925635	-0.872852	-0.78142
C	1.42528	0.281719	0.102736
H	-1.54755	2.58693	-1.37543
H	0.399921	-0.527806	-1.67319
O	1.96355	-1.72668	-1.18314
H	2.36639	-2.10442	-0.388137
O	0.818383	-1.55662	1.41477
O	1.66704	-0.368944	1.35468
C	0.300079	1.31761	0.316546
O	-1.94181	1.38701	1.3373
H	-1.75315	2.33067	1.2313
H	0.625676	2.04549	1.07579
C	-1.27392	-0.755291	0.483291
H	-1.83474	-1.1877	1.32242
O	-2.09855	-0.801972	-0.695641
O	-2.54453	-2.15279	-0.848156
H	-3.48867	-2.06499	-0.650924
H	-0.201051	-2.58427	-0.013138
O	0.184601	2.01682	-0.93944
O	-0.871442	2.96267	-0.789563
C	2.72483	0.929689	-0.333762
H	2.57226	1.4661	-1.27244
H	3.05974	1.6408	0.426314
H	3.49017	0.166796	-0.475889
TSTH-1-O2-3	X	Y	Z
C	0.577817	-1.35794	0.842127	-873.798	0.193656
C	1.07001	1.05166	0.233197
C	-0.099505	1.13432	-0.735069
C	-1.15069	0.440742	0.141244
H	0.855727	-2.36703	0.521834
H	0.086391	0.610718	-1.67332
O	-0.4566	2.45922	-1.02588
H	-0.601244	2.92732	-0.191068
O	0.476368	1.4048	1.49375
O	-0.955652	1.09671	1.40588
C	-0.836616	-1.07198	0.310606
O	0.576704	-1.36729	2.25068
H	0.381988	-0.474238	2.56923
H	-1.5551	-1.5146	1.01135
C	1.63332	-0.373936	0.310126
H	2.50841	-0.409661	0.970473
O	1.97686	-0.838101	-0.983733
O	2.95921	0.067039	-1.49473
H	3.68172	-0.544069	-1.69955
H	1.83863	1.79881	0.02614
O	-0.997853	-1.65858	-0.968387
O	-2.36292	-1.66651	-1.24726
C	-2.56108	0.618667	-0.324839
H	-2.66291	-0.558935	-1.04332
H	-3.32676	0.481148	0.437911
H	-2.73539	1.42299	-1.03669
IMTH-1-O2-3	X	Y	Z
C	0.496825	-1.1644	1.0811	-873.815	0.197858
C	1.07846	1.06969	0.002921
C	-0.126186	1.01126	-0.926505
C	-1.16681	0.505384	0.088012
H	0.762667	-2.21964	0.966522
H	0.01215	0.322489	-1.76064
O	-0.45067	2.27643	-1.43761
H	-0.457913	2.90671	-0.702694
O	0.54965	1.73954	1.14734
O	-0.846828	1.31247	1.26431
C	-0.897085	-0.970596	0.451202
O	0.472475	-0.904038	2.46435
H	0.172794	0.004969	2.60838
H	-1.6425	-1.32391	1.17349
C	1.58555	-0.324724	0.385908
H	2.44377	-0.244143	1.06423
O	1.94587	-1.04684	-0.780999
O	2.98518	-0.304119	-1.4227
H	3.70471	-0.952079	-1.41656
H	1.87553	1.70627	-0.388076
O	-0.93534	-1.7986	-0.702243
O	-2.30149	-2.03852	-1.02753
C	-2.5757	0.788772	-0.268104
H	-2.41986	-1.49156	-1.8199
H	-3.37193	0.272506	0.25215
H	-2.80057	1.63547	-0.903588
TSTH-1-O2-4	X	Y	Z
C	0.197661	-1.43014	0.748426	-873.777	0.193704
C	1.19772	0.889265	0.38471
C	0.212629	1.25477	-0.721633
C	-1.06365	0.685697	-0.059011
H	0.349112	-2.4583	0.408021
H	0.436235	0.781054	-1.67874
O	0.140025	2.63832	-0.915945
H	0.012421	3.06172	-0.054691
O	0.50694	1.31274	1.56375
O	-0.924186	1.15038	1.29311
C	-0.946414	-0.833637	-0.062987
O	-0.067853	-1.48452	2.12613
H	-0.249773	-0.592061	2.45304
H	-2.08021	-1.42609	0.272611
C	1.48193	-0.619879	0.451362
H	2.22403	-0.838577	1.22929
O	1.92325	-1.08765	-0.810777
O	3.09942	-0.341596	-1.13711
H	3.72405	-1.05876	-1.31908
O	-1.13142	-1.39627	-1.31897
O	-2.37387	-2.00548	-0.828764
H	2.11405	1.48069	0.333256
C	-2.38054	1.19363	-0.605712
H	-2.57314	0.710259	-1.56631
H	-3.1915	0.93995	0.081452
H	-2.33963	2.27453	-0.741154
IMTH-1-O2-4	X	Y	Z
C	-0.005648	-1.57323	0.019975	-873.887	0.195826
C	1.24346	0.53605	0.741069
C	0.639582	1.38604	-0.374311
C	-0.811408	0.861603	-0.280452
H	0.154155	-2.47117	-0.581939
H	1.09227	1.20243	-1.35056
O	0.738775	2.75255	-0.095565
H	0.387506	2.91181	0.792412
O	0.293709	0.699788	1.79301
O	-1.01764	0.805932	1.14643
C	-0.794845	-0.568285	-0.835402
O	-0.721952	-1.97352	1.1738
H	-0.801526	-1.21146	1.76846
H	-2.70124	-1.79657	0.591186
C	1.35987	-0.953229	0.376312
H	1.79922	-1.51287	1.21217
O	2.13607	-1.11209	-0.798811
O	3.41241	-0.528012	-0.533832
H	3.99822	-1.27725	-0.716872
O	-1.27445	-0.865567	-1.90107
O	-3.33242	-1.16009	0.190738
H	2.1885	0.943325	1.10567
C	-1.88891	1.72505	-0.892591
H	-1.76233	1.73319	-1.97702
H	-2.86735	1.29982	-0.659922
H	-1.81604	2.7428	-0.508852
TSTH-1-O-1	X	Y	Z
C	0.819369	-1.56663	0.14622	-798.748	0.192279
C	0.448711	0.941425	0.70367
C	-0.544211	1.18735	-0.422456
C	-1.49049	0.049951	-0.12935
H	1.60999	-2.17843	-0.304043
H	-0.103977	1.10364	-1.41625
O	-1.18053	2.44357	-0.325355
H	-1.48675	2.57404	0.582669
O	-0.405219	0.598156	1.80776
O	-1.54419	-0.098941	1.23145
C	-0.332139	-1.56625	-0.875778
O	0.45495	-2.21542	1.3395
H	-0.217687	-1.70039	1.80404
H	-1.14976	-2.26541	-0.602718
C	1.4504	-0.187256	0.421199
H	2.10977	-0.304767	1.29124
O	2.2232	0.130939	-0.717967
O	3.00408	1.27752	-0.339604
H	3.19312	1.64838	-1.21367
H	0.966345	1.85551	1.00354
O	-0.15031	-1.21914	-2.04996
C	-2.80855	-0.122197	-0.805425
H	-3.4099	0.786709	-0.692962
H	-2.63043	-0.3045	-1.86784
H	-3.35512	-0.966602	-0.379104
TSTH-1-O-2	X	Y	Z
C	1.05352	1.56725	5.2e-05	-798.746	0.19247
C	0.481651	-0.749118	-0.896525
C	-0.531405	-1.1952	0.150182
C	-1.39049	0.067935	0.226396
H	1.56296	2.06712	0.818974
H	-0.084297	-1.42045	1.11903
O	-1.24103	-2.32756	-0.285223
H	-1.61109	-2.14295	-1.15972
O	-0.32417	-0.058146	-1.85813
O	-1.45806	0.51722	-1.13679
C	-0.743046	1.1316	1.13315
O	0.718053	2.40689	-0.996496
H	0.279316	1.91517	-1.71059
H	-1.0473	2.16991	0.895607
C	1.57439	0.199568	-0.377411
H	2.33121	0.326805	-1.17041
O	2.19672	-0.296894	0.78685
O	2.78311	-1.54566	0.39909
H	2.71352	-2.03464	1.2321
H	0.916408	-1.60535	-1.41612
O	-0.337819	0.810351	2.25358
C	-2.82092	-0.145699	0.700531
H	-2.80097	-0.481975	1.73975
H	-3.37619	0.794551	0.643664
H	-3.32026	-0.895841	0.086317
IMTH-1-O-2	X	Y	Z
C	1.11407	1.68243	0.249463	-798.746	0.192065
C	0.715125	-0.703733	-0.668672
C	-0.374427	-1.04852	0.346414
C	-1.51291	-0.076636	-0.080012
H	1.56708	2.15021	1.1168
H	-0.070028	-0.847931	1.37621
O	-0.735528	-2.40585	0.298477
H	-0.924676	-2.65697	-0.615036
O	-0.020097	-0.32922	-1.82946
O	-1.0738	0.511461	-1.32353
C	-1.6776	1.06887	0.919287
O	0.663771	2.5714	-0.66767
H	0.136442	2.10998	-1.33971
H	-1.66989	2.09077	0.494022
C	1.70825	0.382135	-0.220938
H	2.40345	0.571067	-1.05652
O	2.43866	-0.092834	0.900132
O	3.23783	-1.18394	0.43556
[truncated: 449 more rows]

## Sheet: T-ONO2
Note: *stands for without the single point eneries
Filename	Cartesian coordinates			Electronic properties
RCTN-1	X	Y	Z	E_elec_0K (Hartree)	ZPE (Hartree)
C	-0.046391	1.24595	1.12975	-852.772	0.185523
C	0.093075	-0.421479	-0.735248
C	-0.767011	-1.32323	0.1421
C	-1.87051	-0.29892	0.45269
H	0.364694	2.06329	1.71386
H	-0.248198	-1.67573	1.0351
O	-1.24149	-2.43752	-0.559713
H	-1.69311	-2.12489	-1.35691
O	-0.868921	0.24166	-1.56597
O	-2.15316	0.180815	-0.879432
C	-1.30224	0.824736	1.29537
O	-1.06309	3.07194	-0.5616
H	-1.41509	2.32763	-1.09196
H	-1.95953	1.30741	2.01399
C	0.843575	0.632633	0.084883
H	1.25265	1.40238	-0.574892
O	1.92558	0.013271	0.824193
H	0.75794	-0.978424	-1.40013
C	-3.16391	-0.865113	0.999334
H	-2.99456	-1.2246	2.01797
H	-3.93111	-0.08686	1.02677
H	-3.51022	-1.6965	0.385026
N	3.08324	-0.222529	0.090447
O	3.0753	0.068749	-1.08015
O	3.96006	-0.704347	0.745772
TSTN-1	X	Y	Z
C	0.054657	1.46593	-0.824802	-852.772	0.18592
C	-0.063806	-0.472981	0.764215
C	0.772138	-1.26398	-0.237369
C	1.86932	-0.206979	-0.457394
H	-0.409735	2.27689	-1.37364
H	0.23068	-1.51421	-1.15127
O	1.26464	-2.44936	0.319132
H	1.7243	-2.23158	1.14306
O	0.920712	0.072784	1.64698
O	2.17908	0.131638	0.912247
C	1.28427	0.996887	-1.16045
O	0.746353	2.85851	0.532455
H	1.32258	2.29291	1.08177
H	1.90046	1.53543	-1.87436
C	-0.835539	0.6689	0.094955
H	-1.30246	1.31683	0.83824
O	-1.85442	0.121602	-0.779741
H	-0.715475	-1.10813	1.36918
C	3.15234	-0.705218	-1.08868
H	2.9675	-0.940134	-2.14041
H	3.92105	0.070012	-1.03316
H	3.5056	-1.60388	-0.582757
N	-3.02573	-0.278419	-0.146472
O	-3.07659	-0.1773	1.05424
O	-3.85036	-0.687941	-0.909591
IMTN-1	X	Y	Z
C	0.097691	1.72786	-0.467686	-852.815	0.188474
C	-0.045273	-0.432529	0.87946
C	0.684955	-1.24447	-0.188156
C	1.77484	-0.208515	-0.530502
H	-0.525043	2.30388	-1.15777
H	0.065469	-1.49953	-1.04917
O	1.20602	-2.43031	0.342144
H	1.72681	-2.20986	1.1283
O	1.03062	0.058859	1.68239
O	2.19911	0.17267	0.810733
C	1.16093	0.977331	-1.20708
O	0.648943	2.67913	0.431333
H	1.30527	2.23304	0.986219
H	1.64973	1.43529	-2.05982
C	-0.823917	0.75332	0.29448
H	-1.35766	1.30041	1.0742
O	-1.75784	0.281903	-0.701323
H	-0.660251	-1.05572	1.53316
C	2.99657	-0.757621	-1.23807
H	2.72398	-1.03107	-2.26097
H	3.77988	0.003563	-1.27693
H	3.37451	-1.64194	-0.724766
N	-2.90778	-0.315512	-0.203094
O	-3.02984	-0.383191	0.995045
O	-3.64739	-0.69428	-1.0635
TSTN-2	X	Y	Z
C	-0.026368	1.09445	-1.37895	-852.771	0.185951
C	0.084313	-1.07171	-0.141301
C	-0.826692	-0.467197	0.920741
C	-1.8869	0.104712	-0.034311
H	0.373685	1.81448	-2.08617
H	-0.352759	0.298105	1.53362
O	-1.35027	-1.45449	1.76519
H	-1.80442	-2.11078	1.2169
O	-0.828927	-1.67244	-1.06542
O	-2.1279	-1.04389	-0.863152
C	-1.2924	1.19881	-0.905284
O	-0.827006	2.557	0.648743
H	0.138028	2.68394	0.580419
H	-1.97468	1.93089	-1.32538
C	0.87641	-0.002635	-0.900529
H	1.42537	-0.457577	-1.72928
O	1.82545	0.663575	-0.022306
C	-3.20519	0.500502	0.592847
H	-3.05167	1.41332	1.17268
H	-3.94666	0.693175	-0.187301
H	-3.56941	-0.289887	1.2496
H	0.72657	-1.86565	0.24771
N	3.00577	-0.03305	0.222276
O	3.13427	-1.11451	-0.294584
O	3.75644	0.56223	0.938018
RCTN-2	X	Y	Z
C	-0.040702	0.942987	-1.48874	-852.77	0.185496
C	-0.021719	-1.08283	-0.019817
C	-0.907297	-0.300664	0.942816
C	-1.9456	0.164317	-0.09005
H	0.413704	1.59608	-2.22827
H	-0.403989	0.529557	1.43836
O	-1.4607	-1.13248	1.92442
H	-1.93407	-1.85185	1.48136
O	-0.957463	-1.77603	-0.851745
O	-2.23413	-1.08694	-0.737273
C	-1.30565	1.10443	-1.09248
O	-0.070945	2.82934	0.630122
H	0.858032	2.55284	0.494517
H	-1.92155	1.89381	-1.51568
C	0.807624	-0.154317	-0.912476
H	1.3194	-0.726392	-1.69015
O	1.8089	0.548911	-0.120198
C	-3.24281	0.696521	0.478874
H	-3.04738	1.6635	0.950719
H	-3.97581	0.834833	-0.320227
H	-3.64477	0.011325	1.22547
H	0.593006	-1.83562	0.480345
N	2.96178	-0.171718	0.179
O	3.03217	-1.30474	-0.223624
O	3.75066	0.460839	0.818517
IMTN-2	X	Y	Z
C	0.057471	1.2268	1.30513	-852.814	0.188837
C	-0.122747	-1.05987	0.342189
C	0.729064	-0.647039	-0.855345
C	1.82448	0.104878	-0.087949
H	-0.254147	1.98439	2.01477
H	0.201772	-0.018018	-1.57499
O	1.21071	-1.76806	-1.54462
H	1.66505	-2.34057	-0.909617
O	0.843691	-1.51793	1.27902
O	2.07957	-0.786643	1.00672
C	1.28542	1.43908	0.480267
O	1.0522	2.37485	-0.573173
H	0.130339	2.32116	-0.857789
H	2.07871	1.87525	1.09791
C	-0.879456	0.124227	0.956287
H	-1.47706	-0.196638	1.81213
O	-1.78203	0.703636	-0.046642
C	3.13095	0.301857	-0.828572
H	2.99274	1.06722	-1.5952
H	3.90211	0.639531	-0.130671
H	3.45296	-0.628245	-1.29761
H	-0.780334	-1.9047	0.123668
N	-2.96639	0.005925	-0.264725
O	-3.14886	-0.998549	0.37723
O	-3.66758	0.520139	-1.08622
TSTN-3	X	Y	Z
C	0.044634	1.51899	-0.662639	-852.769	0.186021
C	-0.210993	-0.605664	0.634239
C	0.648918	-1.22619	-0.464362
C	1.81635	-0.22438	-0.387218
H	-0.340552	2.44684	-1.07141
H	0.154069	-1.24064	-1.4373
O	1.03743	-2.53356	-0.153457
H	1.49432	-2.52108	0.700013
O	0.733897	-0.268939	1.65528
O	2.04688	-0.238277	1.03115
C	1.33272	1.13953	-0.871756
O	2.10109	2.47727	0.488532
H	2.02408	1.88978	1.26382
H	1.94431	1.6627	-1.59766
C	-0.886921	0.68762	0.16894
H	-1.27388	1.2409	1.02975
O	-1.98594	0.382261	-0.726417
H	-0.924777	-1.3114	1.06601
C	3.11373	-0.647131	-1.04198
H	2.97524	-0.68281	-2.12586
H	3.89396	0.082566	-0.810116
H	3.41842	-1.63455	-0.694459
N	-3.1691	-0.001765	-0.102949
O	-3.17437	-0.062707	1.10169
O	-4.05049	-0.228126	-0.878471
IMTN-3	X	Y	Z
C	0.087331	1.68106	0.123488	-852.816	0.18905
C	-0.268787	-0.728658	0.636406
C	0.561005	-1.0674	-0.596561
C	1.76384	-0.162867	-0.306979
H	-0.174125	2.73092	0.193293
H	0.053538	-0.816141	-1.53166
O	0.896692	-2.42715	-0.644117
H	1.31956	-2.66665	0.192907
O	0.688608	-0.709395	1.69084
O	1.98327	-0.400925	1.09241
C	1.40481	1.32768	-0.494972
O	2.43362	2.14726	0.022727
H	2.54332	1.91223	0.955974
H	1.38275	1.53916	-1.57486
C	-0.911604	0.65509	0.52141
H	-1.41528	0.920088	1.45485
O	-1.91257	0.639112	-0.546887
H	-0.999661	-1.50324	0.881918
C	3.04557	-0.53051	-1.02933
H	2.90269	-0.400048	-2.10565
H	3.85712	0.122851	-0.704465
H	3.30788	-1.57055	-0.835903
N	-3.13949	0.083652	-0.20642
O	-3.26915	-0.352656	0.911718
O	-3.93227	0.116189	-1.10197
TSTN-4	X	Y	Z
C	-0.083134	0.851632	1.55563	-852.761	0.180591
C	-0.090143	-0.216652	-0.713939
C	-1.16729	-1.14297	-0.153986
C	-2.09266	-0.045716	0.400782
H	0.426943	1.35836	2.36897
H	-0.794097	-1.81973	0.616551
O	-1.76902	-1.9093	-1.15649
H	-2.10686	-1.30989	-1.83793
O	-0.847335	0.829105	-1.33563
O	-2.17568	0.819964	-0.746072
C	-1.40473	0.665938	1.54772
O	1.37551	2.62523	-0.627704
H	0.520467	2.63353	-1.1018
H	-2.02217	1.0359	2.36232
C	0.749168	0.412486	0.398946
H	1.26403	1.38006	-0.061561
O	1.75584	-0.453595	0.923134
C	-3.50638	-0.478712	0.728472
H	-3.48906	-1.12375	1.61108
H	-4.12315	0.396772	0.947942
H	-3.94417	-1.03101	-0.103315
H	0.519902	-0.682684	-1.49006
N	2.87265	-0.654115	0.095997
O	2.86004	-0.133943	-0.987298
O	3.70198	-1.34431	0.609309
PCTN-4	X	Y	Z
C	0.01319	1.27548	1.17362	-852.822	0.184812
C	-0.2086	-0.925871	0.050875
C	-1.63393	-0.984076	0.607463
C	-2.08696	0.409979	0.138473
H	0.614672	2.03502	1.66143
H	-1.66773	-1.10424	1.6912
O	-2.37241	-2.019	0.026269
H	-2.33566	-1.91064	-0.935591
O	-0.440294	-0.432066	-1.2898
O	-1.67036	0.351606	-1.24752
C	-1.31468	1.47966	0.870013
O	1.61907	1.81032	-1.26634
H	0.934462	1.203	-1.58586
H	-1.80577	2.41871	1.09982
C	0.608624	0.070925	0.811556
H	2.18838	1.98898	-2.0215
O	1.91008	-0.147538	1.18834
C	-3.5833	0.64575	0.132094
H	-3.9426	0.70759	1.16284
H	-3.80818	1.58882	-0.373095
H	-4.10031	-0.16881	-0.375516
H	0.249662	-1.90971	-0.044972
N	2.83254	-0.478428	0.139048
O	2.37482	-0.914637	-0.878764
O	3.964	-0.315029	0.473237
TSTN-5	X	Y	Z
C	-0.035356	1.37138	-1.01446	-852.765	0.185362
C	-0.026475	-0.959131	-0.054358
C	-1.02974	-0.398088	0.945932
C	-2.02645	0.160426	-0.085126
H	0.405416	2.13358	-1.64648
H	-0.61882	0.375227	1.59597
O	-1.58978	-1.4062	1.7394
H	-1.97626	-2.07458	1.15487
O	-0.848596	-1.56936	-1.0536
O	-2.17525	-0.982693	-0.944498
C	-1.38839	1.29104	-0.856488
O	0.135092	2.59984	0.643904
H	1.03467	2.30792	0.880716
H	-2.0237	2.09305	-1.21995
C	0.798344	0.143481	-0.729041
H	1.21142	-0.243786	-1.66482
O	1.89336	0.561328	0.118371
C	-3.39861	0.511689	0.448693
H	-3.31425	1.3968	1.08502
H	-4.07817	0.734794	-0.378046
H	-3.80237	-0.311748	1.0384
H	0.608749	-1.74246	0.367114
N	3.00935	-0.274265	0.11533
O	2.9695	-1.25815	-0.578111
O	3.88168	0.121008	0.830648
IMTN-5	X	Y	Z
C	0.031241	1.62311	-0.588525	-852.809	0.188931
C	-0.020823	-0.863766	0.055362
C	-1.14504	-0.378514	0.968106
C	-2.06052	0.165952	-0.144504
H	0.44961	2.25326	-1.38211
H	-0.831565	0.382593	1.68168
O	-1.7321	-1.43779	1.67152
H	-2.02469	-2.09915	1.02758
O	-0.72416	-1.51266	-1.01017
O	-2.07949	-0.981906	-1.02521
C	-1.40956	1.32056	-0.847629
O	0.098387	2.30835	0.658409
H	1.02553	2.47426	0.877297
H	-1.98866	1.91824	-1.54161
C	0.805706	0.28589	-0.546971
H	1.10169	-0.004648	-1.55761
O	1.98076	0.565515	0.237578
C	-3.49933	0.43394	0.250715
H	-3.53251	1.30734	0.906835
H	-4.09913	0.640247	-0.639694
H	-3.91765	-0.424529	0.777957
H	0.61412	-1.61846	0.527232
N	3.05237	-0.301914	0.047828
O	2.90557	-1.20872	-0.730692
O	4.00437	-0.012649	0.712094
TSTN-6	X	Y	Z
C	0.373087	-2.04257	-0.046809	-852.757	0.181066
C	0.09798	0.356483	-0.547108
C	0.977551	0.608738	0.67017
C	2.12932	-0.288556	0.212792
H	0.023975	-3.07103	-0.036789
H	0.50713	0.247509	1.5918
O	1.40542	1.93432	0.766368
H	0.633458	2.516	0.709859
O	0.952122	0.323426	-1.65426
O	2.2967	0.138314	-1.15082
C	1.63828	-1.72769	0.240016
O	-1.39882	2.30775	-0.013093
H	-2.08521	2.37297	-0.703834
H	2.35904	-2.50675	0.475787
C	-0.624234	-0.98659	-0.458553
O	-1.63682	-0.962773	0.571426
H	-1.08915	-1.23578	-1.41563
C	3.45611	-0.067335	0.904084
H	3.38225	-0.393759	1.94497
H	4.23764	-0.649283	0.408015
H	3.71269	0.991862	0.8745
H	-0.649902	1.25323	-0.624613
N	-2.82903	-0.352815	0.2065
O	-2.94228	0.025573	-0.936434
O	-3.61597	-0.287877	1.10217
RCTN-3	X	Y	Z
C	-0.468096	-2.02932	-0.29513	-852.772	0.185519
C	-0.125202	0.193503	0.782506
C	-0.879362	0.7604	-0.414938
C	-2.10437	-0.153249	-0.303574
H	-0.165509	-3.05149	-0.502112
H	-0.334829	0.599618	-1.35239
O	-1.26074	2.0966	-0.243916
H	-0.462068	2.64009	-0.262006
O	-1.12271	-0.090355	1.76082
O	-2.40347	-0.072078	1.09311
C	-1.67649	-1.57421	-0.629276
O	1.7365	2.25497	-0.286801
H	2.5831	2.4565	0.159715
H	-2.40551	-2.23092	-1.0979
C	0.529513	-1.14043	0.399097
O	1.58641	-0.95702	-0.590967
H	0.962128	-1.62193	1.28056
C	-3.33627	0.308091	-1.05148
H	-3.15297	0.245717	-2.12782
H	-4.18617	-0.332843	-0.80222
H	-3.5647	1.34005	-0.784674
H	0.582431	0.893644	1.23247
N	2.74286	-0.374827	-0.134597
O	2.79553	-0.047644	1.03143
O	3.5817	-0.247398	-0.979257
PCTN-6	X	Y	Z
C	-0.558399	-2.0738	-0.306991	-852.799	0.18607
C	-0.135794	0.092006	0.708203
C	-0.851127	0.728943	-0.454254
C	-2.1243	-0.113915	-0.267877
H	-0.315068	-3.1103	-0.524373
H	-0.354109	0.514031	-1.40662
O	-1.13214	2.08484	-0.285072
H	-0.277635	2.54164	-0.239872
O	-1.00144	-0.015215	1.74
O	-2.36776	0.017567	1.14157
C	-1.7624	-1.56269	-0.584628
O	1.70205	2.29173	-0.127836
H	2.44523	2.67816	-0.604174
H	-2.5319	-2.19168	-1.02619
C	0.50515	-1.23376	0.375616
O	1.5622	-1.0814	-0.604297
H	0.904094	-1.7293	1.26487
C	-3.36017	0.393889	-0.97684
H	-3.22373	0.297756	-2.05771
H	-4.23438	-0.192092	-0.67984
H	-3.51845	1.44296	-0.725349
H	2.03098	2.05574	0.749423
N	2.68622	-0.434278	-0.139603
O	2.75196	-0.188778	1.04291
O	3.48434	-0.190111	-0.998815
TSTN-7	X	Y	Z
C	0.103779	-1.74234	-0.134664	-852.757	0.181057
C	0.404001	0.645519	0.558113
C	-0.430985	1.00449	-0.66611
C	-1.60014	0.042526	-0.380094
H	0.44908	-2.76957	-0.201761
H	0.073973	0.79579	-1.61046
O	-0.820366	2.34763	-0.661261
H	-1.2465	2.53971	0.186675
O	-0.559719	0.572268	1.61481
O	-1.85879	0.37161	0.998859
C	-1.13186	-1.39357	-0.491097
O	-4.34199	-1.11059	0.315291
H	-3.8656	-0.820649	1.11724
H	-1.8517	-2.13321	-0.832057
C	1.06839	-0.726724	0.41008
O	2.1406	-0.664989	-0.564518
H	1.48309	-1.04486	1.37031
C	-2.8792	0.313706	-1.12381
H	-2.84999	-0.064415	-2.14732
H	-3.73392	-0.338641	-0.579466
H	-3.19457	1.35515	-1.07504
H	1.12155	1.42465	0.828498
N	3.33691	-0.13271	-0.097396
O	3.37573	0.239625	1.04977
O	4.19606	-0.115117	-0.929117
RCTN-5	X	Y	Z
C	-0.046263	-1.2459	-1.12969	-852.77	0.185484
C	0.093031	0.421478	0.73529
C	-0.766915	1.3232	-0.142171
C	-1.87043	0.29903	-0.452846
H	0.364803	-2.06326	-1.71381
H	-0.247943	1.67574	-1.03507
O	-1.24143	2.43755	0.559617
H	-1.69291	2.12492	1.35691
O	-0.869053	-0.241575	1.56597
O	-2.1532	-0.180727	0.879349
C	-1.30207	-0.824601	-1.29557
O	-1.06296	-3.07244	0.561785
H	-1.41554	-2.32791	1.09139
H	-1.95911	-1.30708	-2.01453
C	0.843621	-0.632715	-0.084671
O	1.92558	-0.013474	-0.82415
H	1.25267	-1.40251	0.575068
C	-3.16394	0.86514	-0.999298
H	-2.99552	1.22245	-2.01885
H	-3.93183	0.087423	-1.0244
H	-3.50897	1.6979	-0.386152
H	0.757841	0.978506	1.40015
N	3.08312	0.222624	-0.090399
O	3.075	-0.068121	1.08031
O	3.96011	0.70399	-0.745896
PCTN-7	X	Y	Z
C	-0.020041	-1.58903	-0.560054	-852.795	0.184576
C	0.370223	0.564018	0.655652
C	-0.369755	1.23294	-0.495623
C	-1.60585	0.315802	-0.503364
H	0.267467	-2.6014	-0.827028
H	0.183988	1.20597	-1.43529
O	-0.6942	2.56457	-0.213935
H	-1.1965	2.5853	0.613721
O	-0.654668	0.314724	1.62432
O	-1.92928	0.361385	0.924028
C	-1.21441	-1.09513	-0.886755
O	-3.85191	-1.65741	0.368688
H	-3.31539	-1.15213	0.99611
H	-1.95841	-1.70177	-1.39388
C	0.968518	-0.780253	0.230672
O	2.09194	-0.57164	-0.664398
H	1.31878	-1.32707	1.11009
C	-2.77691	0.837159	-1.24105
H	-3.57916	0.159307	-1.50095
H	-4.61223	-1.98744	0.856059
H	-2.88129	1.90478	-1.38173
H	1.11016	1.21784	1.12451
N	3.28831	-0.232084	-0.047363
O	3.29182	-0.12586	1.15502
O	4.18801	-0.084762	-0.822097
TSTN-8	X	Y	Z
C	0.166989	-1.16664	1.55228	-852.757	0.180881
C	0.062608	-0.468915	-0.850402
C	0.916594	0.714603	-0.410248
C	2.01659	-0.074152	0.296481
H	-0.25636	-1.65056	2.42734
H	0.327374	1.4282	0.321874
O	1.41647	1.49216	-1.43633
H	0.747413	2.14318	-1.68745
O	1.01081	-1.45893	-1.24303
O	2.29399	-1.08484	-0.681722
C	1.42417	-0.723125	1.53483
O	-0.509644	2.51334	0.568255
H	-1.25295	2.03509	0.983698
H	2.07235	-0.85544	2.39746
C	-0.718054	-1.03994	0.341941
O	-1.77558	-0.127532	0.751153
H	-1.17049	-1.99723	0.070578
H	-0.576954	-0.25465	-1.71081
C	3.30382	0.678906	0.547664
H	3.11921	1.47576	1.27342
H	4.05899	-0.000191	0.951595
H	3.66462	1.11693	-0.382843
N	-2.89334	-0.091456	-0.074771
O	-2.95569	-0.889474	-0.974056
O	-3.66987	0.764602	0.241149
RCTN-4	X	Y	Z
C	0.449831	-1.85739	0.855959	-852.772	0.185523
C	0.121765	-0.041497	-0.833523
C	0.885113	0.830825	0.160748
C	2.10524	-0.082735	0.299005
H	0.13549	-2.76655	1.35989
H	0.346359	0.93372	1.10794
O	1.25742	2.0693	-0.370609
H	0.472996	2.63333	-0.374731
O	1.11083	-0.568399	-1.71042
O	2.39468	-0.404244	-1.06458
C	1.66813	-1.34271	1.02936
O	-1.67112	2.51803	0.314253
H	-2.37956	2.1532	0.884356
H	2.39309	-1.83742	1.67141
C	-0.525516	-1.21849	-0.093574
O	-1.6118	-0.709448	0.740085
H	-0.935927	-1.94592	-0.79686
H	-0.599012	0.515846	-1.44138
C	3.34615	0.562331	0.877243
H	3.16967	0.814662	1.9267
H	4.18891	-0.13179	0.820137
H	3.581	1.47103	0.32295
N	-2.75551	-0.368447	0.055309
O	-2.89761	-0.770717	-1.06844
O	-3.506	0.320093	0.704853
PCTN-8	X	Y	Z
C	0.529024	-1.85179	0.811832	-852.804	0.186268
C	0.15682	-0.018886	-0.850608
C	0.921555	0.808278	0.134958
C	2.14933	-0.038422	0.285525
H	0.233627	-2.77654	1.29858
H	-1.92495	1.96186	1.00916
O	1.07731	2.13906	-0.009479
H	0.196366	2.5277	-0.153898
O	1.16111	-0.569294	-1.72831
O	2.44791	-0.359967	-1.09409
C	1.73827	-1.31884	0.995744
O	-1.70667	2.28666	0.125346
H	-2.50033	2.72516	-0.200994
H	2.47563	-1.81394	1.62322
C	-0.470095	-1.21147	-0.115037
O	-1.55325	-0.75318	0.745585
H	-0.874674	-1.93346	-0.828162
H	-0.564724	0.532265	-1.45633
C	3.37117	0.638016	0.862973
H	3.18344	0.890158	1.90985
H	4.23234	-0.032827	0.807479
H	3.5857	1.55327	0.309954
N	-2.72115	-0.425465	0.09622
O	-2.81091	-0.659338	-1.08172
O	-3.53686	0.07897	0.824582
TSTN-9	X	Y	Z
C	0.372029	1.98037	-0.536253	-852.741	0.180366
C	0.058975	-0.498526	-0.352731
C	-0.806775	-0.171775	0.867613
C	-1.72268	0.855688	0.179347
H	0.965871	2.85155	-0.79579
H	-0.20115	0.272429	1.66662
O	-1.46289	-1.26305	1.40762
H	-2.00501	-1.94232	0.686616
O	-0.868361	-0.542711	-1.44267
O	-2.07118	0.15327	-1.02513
C	-0.905457	2.08444	-0.169449
O	-2.09372	-2.74434	-0.203834
H	-1.98763	-2.2236	-1.02324
H	-1.39891	3.05276	-0.139712
C	1.04724	0.639551	-0.630939
O	2.08564	0.669102	0.37797
H	1.50977	0.494535	-1.61077
H	0.541989	-1.47711	-0.289258
C	-3.01849	1.16174	0.8981
H	-2.79958	1.70521	1.82135
H	-3.65862	1.78465	0.268066
H	-3.54042	0.236508	1.14459
N	3.11089	-0.255875	0.201735
O	3.03601	-1.00278	-0.742384
O	3.95555	-0.178533	1.04409
PCTN-9	X	Y	Z
C	-0.171734	-1.99732	-0.663714	-852.785	0.185021
C	0.001554	0.477959	-0.267441
C	0.875161	0.060941	0.945581
C	1.85937	-0.821311	0.135863
H	-0.721952	-2.87482	-0.989682
H	0.270618	-0.499417	1.67223
O	1.45538	1.16429	1.47554
H	1.48659	3.26868	0.58529
O	0.922578	0.66841	-1.33496
O	2.16163	0.026127	-0.971947
C	1.11502	-2.05825	-0.321215
O	0.967325	3.35897	-0.2214
H	1.38235	2.75793	-0.853768
H	1.66416	-2.99476	-0.37652
C	-0.917768	-0.692411	-0.640042
O	-1.96267	-0.862926	0.342832
H	-1.3713	-0.48121	-1.61253
H	-0.529525	1.42153	-0.117322
C	3.17339	-1.1137	0.829966
H	2.99436	-1.75683	1.69597
H	3.851	-1.63033	0.145193
H	3.63478	-0.181331	1.15976
N	-3.04953	0.002265	0.20937
O	-3.02249	0.799307	-0.693815
O	-3.8873	-0.176767	1.04272
TSTN-2-1	X	Y	Z
C	-0.03826	1.17941	-1.37052	-852.786	0.186177
C	0.04066	-1.15725	-0.452032
C	-0.647548	-0.681353	0.823596
C	-1.74771	0.162059	0.165337
H	0.286623	1.92848	-2.08191
H	-0.004537	-0.099168	1.48472
O	-1.15081	-1.76291	1.55976
H	-1.66367	-2.32299	0.959126
O	-1.05848	-1.58175	-1.24696
O	-2.15909	-0.672827	-0.933025
C	-1.17273	1.46695	-0.43488
O	-0.808237	2.39897	0.567567
H	0.120155	2.2483	0.795051
H	-1.98319	1.93243	-1.01063
C	0.781755	-0.030237	-1.17211
H	1.34751	-0.378471	-2.04077
O	1.537	0.800535	-0.314384
H	0.669393	-2.0366	-0.292391
C	-2.96769	0.436577	1.01977
H	-2.71008	1.17192	1.78522
H	-3.76889	0.845081	0.397417
H	-3.31543	-0.479692	1.49726
N	2.97396	-0.045814	0.327753
O	3.13808	-1.13054	-0.141484
O	3.59071	0.605348	1.10074
PTN-2-1	X	Y	Z
C	0.127611	1.31521	1.33489	-852.852	0.187816
C	0.042969	-1.1584	0.716028
C	0.444423	-0.744705	-0.697965
C	1.64745	0.134231	-0.324019
H	0.112275	2.03921	2.14597
H	-0.32754	-0.196053	-1.2389
O	0.789694	-1.86337	-1.46905
H	1.41272	-2.39896	-0.95671
O	1.29303	-1.5732	1.2532
O	2.26114	-0.604484	0.75487
C	1.18983	1.48964	0.263874
O	0.737694	2.37691	-0.735855
H	-0.205805	2.21797	-0.877783
H	2.07587	1.94514	0.719264
C	-0.496103	-0.001824	1.53117
H	-0.942607	-0.244242	2.49266
O	-1.16849	1.02242	0.802827
H	-0.605249	-2.03783	0.733042
C	2.68453	0.321415	-1.41295
H	2.27453	0.961094	-2.19724
H	3.57165	0.806659	-0.996386
H	2.9703	-0.640374	-1.83955
N	-3.02425	-0.272808	-0.676735
O	-3.08277	-1.07729	0.199923
O	-3.70663	0.634474	-1.02009
TSTN-2-5	X	Y	Z
C	-0.030386	1.60716	0.258077	-852.736	0.180885
C	-0.253704	-0.816861	-0.276732
C	1.10284	-0.655743	-0.973807
C	1.86361	-0.059668	0.217705
H	-0.443271	2.6063	0.359334
H	1.0746	0.008576	-1.84012
O	1.60066	-1.88959	-1.40349
H	1.54487	-2.5118	-0.663471
O	0.143314	-1.50852	0.893961
O	1.33445	-0.80686	1.33881
C	1.45234	1.41853	0.426175
O	2.17011	2.29968	-0.421373
H	1.75834	2.31683	-1.29394
H	1.74851	1.69128	1.44678
C	-0.840785	0.552125	0.033913
H	-1.28279	0.163946	1.83996
O	-2.13242	0.87379	-0.397702
H	-0.940238	-1.46957	-0.81595
C	3.3665	-0.239779	0.20214
H	3.80325	0.348334	-0.606806
H	3.78787	0.108647	1.14923
H	3.61814	-1.29168	0.063789
N	-3.18702	0.00915	-0.035875
O	-2.90956	-1.00946	0.536508
O	-4.24689	0.432264	-0.385776
PTN-2-5	X	Y	Z
C	-0.153132	1.55581	0.144209	-852.746	0.180344
C	-0.217457	-0.846221	-0.441698
C	1.20189	-0.691331	-0.999733
C	1.82372	-0.033364	0.241595
H	-0.617767	2.53062	0.263892
H	1.25064	-0.067543	-1.89486
O	1.76976	-1.93001	-1.31307
H	1.67487	-2.50783	-0.541526
O	0.049383	-1.45558	0.816801
O	1.2628	-0.822409	1.30788
C	1.32292	1.42458	0.416582
O	2.05296	2.34112	-0.381418
H	1.70483	2.33564	-1.28143
H	1.53114	1.70481	1.45644
C	-0.852049	0.511553	-0.28878
H	-0.664433	0.462082	2.72359
O	-2.16267	0.70308	-0.721079
H	-0.833776	-1.54781	-1.00875
C	3.33132	-0.124768	0.354463
H	3.79732	0.512474	-0.398795
H	3.64621	0.222369	1.34252
H	3.65909	-1.15523	0.215609
N	-3.13205	-0.002923	0.035018
O	-2.73176	-0.631103	0.975239
O	-4.23635	0.139069	-0.394557
TSTN-2-2	X	Y	Z
C	0.058528	1.60907	0.330683	-852.748	0.181331
C	-0.273927	-0.866886	0.391133
C	0.684883	-0.88158	-0.795405
C	1.83844	-0.114358	-0.117999
H	-0.297603	2.63285	0.404222
H	0.285672	-0.37764	-1.67714
O	1.05065	-2.18097	-1.16178
H	1.41508	-2.62499	-0.382372
O	0.569326	-1.12012	1.51846
O	1.93421	-0.851899	1.10196
C	1.37515	1.33232	0.126803
O	2.28565	2.26552	-0.26784
H	1.90632	3.15069	-0.197959
H	1.90318	1.32691	1.83765
C	-0.923064	0.50921	0.568087
H	-1.40497	0.573871	1.54764
O	-1.94307	0.699872	-0.45668
H	-1.01776	-1.66633	0.346931
C	3.19051	-0.203197	-0.793443
H	3.16846	0.350199	-1.73397
H	3.95687	0.236942	-0.15227
H	3.42781	-1.24789	-0.993648
N	-3.16684	0.100511	-0.193704
O	-3.27275	-0.545992	0.820293
O	-3.98381	0.312877	-1.0422
PTN-2-2	X	Y	Z
C	0.089499	1.63126	0.363974	-852.259	0.179243
C	-0.255542	-0.843897	0.475161
C	0.658057	-0.934092	-0.739958
C	1.81529	-0.093346	-0.173429
H	-0.233848	2.65512	0.530863
H	0.219605	-0.512486	-1.64579
O	1.04006	-2.253	-1.00967
H	1.42428	-2.62735	-0.203399
O	0.634206	-1.03347	1.57739
O	1.97462	-0.704278	1.11473
C	1.34884	1.34233	0.014704
O	2.33622	2.25017	-0.152353
H	2.01047	3.1394	0.035957
C	-0.904097	0.539023	0.586822
H	-1.41069	0.638004	1.54962
O	-1.90038	0.692847	-0.469623
H	-0.99547	-1.64719	0.514856
C	3.13737	-0.21822	-0.901716
H	3.07089	0.292896	-1.86509
H	3.93398	0.24785	-0.32023
H	3.36373	-1.27096	-1.06923
N	-3.12869	0.102819	-0.218541
O	-3.26396	-0.503536	0.817284
O	-3.9231	0.279597	-1.09665
TSTN-2-3	X	Y	Z
C	-0.056459	1.46657	-0.92721	-852.746	0.184123
C	0.229778	-0.962932	-0.38724
C	-0.685759	-0.769875	0.819135
C	-1.83635	-0.038564	0.098117
H	0.30117	2.45218	-1.20785
H	-0.237022	-0.165994	1.61144
O	-1.07245	-1.99599	1.37348
H	-1.44596	-2.54289	0.667366
O	-0.664479	-1.39621	-1.40472
O	-1.97468	-0.838746	-1.08791
C	-1.38102	1.36145	-0.285612
O	-1.90402	2.39974	0.440998
H	-1.19619	3.00934	0.691879
H	-1.20815	1.34755	-1.58172
C	0.917681	0.339017	-0.819002
H	1.49941	0.186549	-1.72961
O	1.8442	0.745099	0.248263
H	0.955183	-1.76656	-0.239188
C	-3.17372	-0.047722	0.809461
H	-3.10996	0.551477	1.71925
H	-3.93999	0.385581	0.162728
H	-3.44579	-1.07123	1.06711
N	3.0669	0.085299	0.267321
O	3.25174	-0.781871	-0.552424
O	3.80395	0.484134	1.12249
IMTN-2-3	X	Y	Z
C	0.080965	1.16772	1.4612	-852.823	0.18981
C	-0.059861	-1.09562	0.374439
C	0.730083	-0.660604	-0.860889
C	1.78886	0.198422	-0.133848
H	-0.493488	2.0619	1.72403
H	0.152856	-0.077529	-1.58034
O	1.27214	-1.76708	-1.52675
H	1.76692	-2.29403	-0.882684
O	0.972186	-1.4809	1.27773
O	2.13781	-0.6496	0.971722
C	1.107	1.43668	0.398639
O	0.818217	2.32216	-0.603328
H	0.166459	2.97067	-0.311217
H	0.587954	0.814263	2.36358
C	-0.869007	0.046946	1.01273
H	-1.47724	-0.323526	1.8417
O	-1.73491	0.674154	0.036311
H	-0.663577	-1.98763	0.192341
C	3.05093	0.485431	-0.922614
H	2.81891	1.19828	-1.71703
H	3.80156	0.92802	-0.26374
H	3.44208	-0.432585	-1.36246
N	-2.86865	-0.045852	-0.30667
O	-3.03129	-1.11915	0.219841
O	-3.55861	0.519067	-1.10495
TSTN-2-4	X	Y	Z
C	0.05205	1.52455	-0.639832	-852.742	0.183521
C	0.217398	-0.894609	0.14335
C	-1.0562	-0.645166	0.955685
C	-1.90011	-0.017228	-0.164676
H	0.524054	2.49255	-0.770116
H	-0.905228	0.030712	1.80149
O	-1.59036	-1.83768	1.45724
H	-1.64699	-2.47108	0.727071
O	-0.314375	-1.52811	-1.01506
O	-1.56079	-0.831371	-1.30594
C	-1.44104	1.43369	-0.460045
O	-1.87967	2.31602	0.568346
H	-1.21594	2.35283	1.26786
H	-1.9639	1.76319	-1.36402
C	0.910726	0.395367	-0.216693
H	0.690009	0.696954	-1.45284
O	2.075	0.754105	0.44802
H	0.897583	-1.61136	0.609332
C	-3.40121	-0.093796	0.025916
H	-3.70179	0.582488	0.828377
H	-3.90311	0.213196	-0.895922
H	-3.70193	-1.11155	0.275368
N	3.22681	-0.000548	0.073954
O	3.07749	-0.849306	-0.760164
O	4.19894	0.332469	0.681756
PTN-2-4	X	Y	Z
C	-0.635447	0.01842	1.11223	-852.888	0.187101
C	0.861347	-1.45084	-0.273235
C	1.54262	-0.279833	-0.989215
C	1.67451	0.647076	0.232841
H	-1.6636	0.36071	1.26058
H	0.94222	0.157431	-1.7867
O	2.78227	-0.656161	-1.51915
H	3.30718	-1.05103	-0.807827
O	1.62982	-1.57529	0.92375
O	2.17853	-0.253254	1.22479
C	0.286153	1.16723	0.672733
O	-0.231923	1.85523	-0.450278
H	-1.17224	2.03333	-0.326195
H	0.432809	1.85327	1.5189
C	-0.575372	-1.0681	0.064694
H	-0.257879	-0.389276	2.05626
O	-1.5276	-1.54129	-0.51168
H	0.925004	-2.3964	-0.815586
C	2.67369	1.77609	0.082214
H	2.25088	2.53149	-0.584299
H	2.86652	2.2326	1.05681
H	3.611	1.40851	-0.336208
N	-3.83636	0.094609	-0.415219
O	-4.0914	-0.367119	0.645844
O	-3.15875	1.00499	-0.78112
TSTN-1-1	X	Y	Z
C	0.099065	1.69959	-0.454777	-852.787	0.187484
C	-0.050452	-0.558364	0.85221
C	0.749264	-1.25583	-0.245848
C	1.83412	-0.193989	-0.520199
H	-0.512918	2.12116	-1.26018
H	0.175104	-1.4847	-1.14699
O	1.30162	-2.45181	0.229326
H	1.63203	-2.28155	1.12463
O	0.910171	-0.233573	1.81797
O	2.03425	0.493706	0.723102
C	1.35545	1.10556	-1.02942
O	0.415376	2.78482	0.391846
H	1.08251	2.47004	1.02033
H	2.03143	1.76483	-1.5657
C	-0.787368	0.668785	0.29151
H	-1.32767	1.19748	1.07899
O	-1.71977	0.213392	-0.71865
H	-0.762775	-1.24554	1.32727
C	3.11408	-0.743642	-1.11217
H	2.90079	-1.22786	-2.06932
H	3.8351	0.062009	-1.26742
H	3.54379	-1.48683	-0.440398
N	-2.90829	-0.324755	-0.242554
O	-3.07941	-0.34163	0.95065
O	-3.62778	-0.708444	-1.11814
IMTN-1-1	X	Y	Z
C	0.244415	1.63372	-0.701741	-852.864	0.189753
C	-0.104253	-0.038163	1.17145
C	0.635042	-1.19952	0.461034
C	1.56747	-0.648926	-0.610837
H	-0.282266	2.00926	-1.58393
H	-0.091538	-1.87513	-0.001346
O	1.35055	-1.95066	1.40314
H	1.8472	-1.32569	1.95272
O	0.748442	0.633146	2.00443
O	2.33995	0.455441	-0.13577
C	1.36813	0.71203	-1.15007
O	0.758292	2.75422	-0.030275
H	1.34535	2.43994	0.674343
H	1.80514	0.939924	-2.12149
C	-0.786003	0.904926	0.173644
H	-1.41944	1.63627	0.680288
O	-1.56304	0.141199	-0.774866
H	-0.849667	-0.496187	1.85007
C	2.3269	-1.68261	-1.40005
H	1.63448	-2.28713	-1.99295
H	3.03765	-1.19561	-2.07086
H	2.86952	-2.34191	-0.718587
N	-2.75535	-0.377549	-0.291292
O	-3.04923	-0.130893	0.852687
O	-3.34987	-1.02116	-1.10557
TSTN-1-2	X	Y	Z
C	0.103098	1.73781	-0.46851	-852.78	0.185695
C	-0.057508	-0.392465	0.949547
C	0.683237	-1.27121	-0.07387
C	1.86677	-0.06464	-0.550469
H	-0.532445	2.35392	-1.1095
H	0.127507	-1.62877	-0.942406
O	1.34932	-2.28783	0.513048
H	1.76065	-1.92428	1.32066
O	0.88173	-0.003317	1.85076
O	2.31422	0.299828	0.647473
C	1.02983	0.892791	-1.2826
O	0.745572	2.61189	0.425583
H	1.3886	2.10074	0.94396
H	0.839779	0.73502	-2.33912
C	-0.827683	0.766682	0.311784
H	-1.38345	1.32741	1.06596
O	-1.72487	0.251069	-0.698958
H	-0.753882	-1.08387	1.45662
C	2.90777	-0.834714	-1.37323
H	2.4508	-1.25985	-2.27104
H	3.69354	-0.138168	-1.67213
H	3.34212	-1.63057	-0.77019
N	-2.89904	-0.320705	-0.226055
O	-3.07705	-0.332058	0.966581
O	-3.59806	-0.741098	-1.10153
IMTN-1-2	X	Y	Z
C	0.294733	0.237388	1.20499	-852.891	0.188298
C	-0.571573	-1.13513	-0.556083
C	0.708725	-0.420942	-1.11883
C	2.51936	0.901166	0.102594
H	0.151762	1.04279	1.93512
H	0.50912	0.027426	-2.09667
O	1.76447	-1.32936	-1.28516
H	1.58124	-2.10706	-0.734951
O	-0.337808	-2.42078	-0.161304
O	3.06293	0.691201	1.17109
C	1.02581	0.685766	-0.067528
O	0.896237	-0.900493	1.77709
H	1.81793	-0.665241	1.96891
H	0.588229	1.63341	-0.408388
C	-1.03214	-0.287309	0.656766
H	-1.60861	-0.867841	1.37722
O	-1.74781	0.882095	0.231275
H	-1.3862	-1.20238	-1.29874
C	3.28306	1.36979	-1.10551
H	3.31399	0.544323	-1.82469
H	2.77936	2.21586	-1.58251
H	4.29781	1.64402	-0.817543
N	-3.07426	0.664272	-0.126065
O	-3.4893	-0.465185	-0.060755
O	-3.63531	1.66507	-0.463932
TSTN-1-3	X	Y	Z
C	0.006023	1.60601	-0.004493	-852.75	0.18168
C	0.080307	-0.869566	0.392778
C	1.09438	-0.876833	-0.743878
C	2.044	0.181748	-0.151062
H	-0.280745	1.47333	-1.7924
H	0.667224	-0.591671	-1.70714
O	1.7088	-2.12587	-0.889494
H	2.10548	-2.36632	-0.039416
O	0.891385	-0.818917	1.57198
O	2.2139	-0.369989	1.17072
C	1.36278	1.52223	-0.06871
O	-0.705497	2.7451	0.190919
H	-0.161761	3.52107	0.006558
H	1.97108	2.42276	-0.097822
C	-0.801403	0.3817	0.365198
H	-1.23413	0.551096	1.35493
O	-1.8636	0.2514	-0.599142
H	-0.519848	-1.78174	0.440797
C	3.42163	0.252597	-0.777357
H	3.33726	0.674878	-1.78219
H	4.07143	0.895935	-0.178257
H	3.8634	-0.741671	-0.848168
N	-2.97294	-0.456756	-0.147317
O	-2.9352	-0.909852	0.970181
O	-3.84167	-0.527826	-0.96523
PTN-1-3	X	Y	Z
C	0.000365	1.61636	0.072388	-852.258	0.178999
C	0.099123	-0.829547	0.549663
C	1.02352	-0.930978	-0.658884
C	1.99431	0.187109	-0.244607
H	0.519909	-0.739299	-1.60757
O	1.6416	-2.18515	-0.735739
H	2.10769	-2.3405	0.098777
O	0.996236	-0.656089	1.65156
O	2.27402	-0.229888	1.10621
C	1.29333	1.52361	-0.253368
O	-0.743679	2.74393	0.137024
H	-0.22852	3.50814	-0.14969
H	1.87934	2.41382	-0.470449
C	-0.799005	0.404803	0.464745
H	-1.30659	0.585143	1.41581
O	-1.7847	0.24262	-0.580218
H	-0.477691	-1.74064	0.728868
C	3.31909	0.208271	-0.979194
H	3.15149	0.523886	-2.01241
H	4.00056	0.917212	-0.501549
H	3.77341	-0.782899	-0.982756
N	-2.92387	-0.459902	-0.208349
O	-2.97411	-0.89415	0.916068
O	-3.72648	-0.546678	-1.09054
TSTN-1-4	X	Y	Z
C	-0.00742	1.65581	-0.158945	-852.747	0.184027
C	0.025359	-0.733162	0.608693
C	0.958626	-1.05128	-0.554853
C	2.00236	0.053774	-0.297388
H	0.381894	1.47602	-1.37541
H	0.474353	-0.974953	-1.53115
O	1.5025	-2.33657	-0.445011
H	1.94404	-2.40241	0.414459
O	0.916373	-0.448469	1.69023
O	2.22117	-0.151653	1.11827
C	1.40975	1.41033	-0.539869
O	-0.415625	2.92198	0.171278
H	0.261298	3.34818	0.718132
H	2.04465	2.28037	-0.675287
C	-0.826729	0.515345	0.360182
H	-1.32535	0.821391	1.28266
O	-1.83776	0.232005	-0.650886
H	-0.587824	-1.58983	0.899109
C	3.34573	-0.13754	-0.973601
H	3.22885	0.001448	-2.05098
H	4.05987	0.600379	-0.599112
H	3.73265	-1.13906	-0.784927
N	-2.95589	-0.451977	-0.195648
O	-2.99657	-0.751749	0.973351
O	-3.76125	-0.657716	-1.05639
IMTN-1-4	X	Y	Z
C	0.039089	1.63512	0.144845	-852.825	0.188886
C	0.047495	-0.767257	0.69113
C	0.906634	-1.03693	-0.539918
C	1.93763	0.084244	-0.329649
H	1.14089	1.54818	-1.70874
H	0.360899	-0.944068	-1.48141
O	1.47863	-2.31581	-0.494975
H	1.90636	-2.42374	0.367057
O	1.01631	-0.575693	1.71469
O	2.21211	-0.034316	1.07358
C	1.30534	1.45558	-0.621143
O	-0.563038	2.8457	0.230401
H	0.045409	3.54938	-0.025417
H	2.03072	2.23217	-0.338697
C	-0.806317	0.494838	0.532523
H	-1.3835	0.711872	1.43449
O	-1.76276	0.274851	-0.572956
H	-0.555586	-1.63006	0.983481
C	3.25538	-0.102292	-1.05701
H	3.10371	0.024377	-2.13241
H	3.97844	0.642943	-0.714849
H	3.65562	-1.09973	-0.875366
N	-2.89404	-0.451938	-0.249902
O	-2.98759	-0.879456	0.87683
O	-3.66069	-0.568725	-1.16301
TSTN-1-1-1	X	Y	Z
C	0.228968	1.38449	-1.05991	-852.85	0.187663
C	-0.309706	0.575444	1.29313
C	0.819682	-1.16154	0.791615
C	1.60524	-0.820333	-0.441504
H	-0.256949	1.52371	-2.03107
H	0.066999	-1.94276	0.704058
O	1.53839	-1.27167	1.92076
H	2.10134	-0.481415	2.00618
O	0.543799	1.31432	1.80943
O	2.3912	0.353755	-0.285744
C	1.35383	0.378947	-1.26348
O	0.727705	2.63507	-0.673804
H	1.12484	2.52481	0.206661
H	1.73861	0.345758	-2.28273
C	-0.860735	0.92538	-0.082899
H	-1.59874	1.72784	0.010971
O	-1.46975	-0.22775	-0.696902
H	-0.937702	-0.080364	1.9227
N	-2.73961	-0.547978	-0.229928
O	-3.23518	0.180094	0.591968
O	-3.18055	-1.54248	-0.729413
C	2.3173	-2.01388	-1.0438
H	2.96112	-1.68292	-1.86197
H	2.93326	-2.5049	-0.28528
H	1.59213	-2.73574	-1.42926
PTN-1-1-1	X	Y	Z
C	-1.77793	-0.721552	0.197091	-852.85	0.187496
C	0.5077	1.68496	-0.697804
C	1.26841	0.741917	0.223252
C	0.955259	-0.753476	0.064024
H	-2.38539	-1.42457	0.784883
H	1.02698	1.03634	1.25265
O	2.64942	1.01267	0.066414
H	2.94226	0.730738	-0.809562
O	-0.640966	1.56557	-1.0495
O	0.319989	-1.15283	-1.14916
C	-0.39423	-1.3644	0.064848
O	-2.43075	-0.602545	-1.03485
H	-1.86399	-0.061895	-1.60449
H	-0.396576	-2.41435	0.358472
C	-1.83686	0.567176	1.00554
H	-2.62925	1.26962	0.682945
O	-1.13533	0.785058	1.96556
H	1.11654	2.54883	-1.03048
C	2.09923	-1.64473	0.5006
H	1.79403	-2.69082	0.441145
H	2.97579	-1.50708	-0.136177
H	2.3912	-1.40954	1.52762
TSTN-1-1-2	X	Y	Z
C	0.144988	1.5929	-0.918126	-852.837	0.186181
C	0.201877	0.064297	1.55735
C	0.822456	-1.06892	0.724795
C	1.47219	-0.696386	-0.60406
H	-0.317088	1.99396	-1.83263
H	0.058449	-1.83168	0.536472
O	1.79339	-1.6799	1.55511
H	2.40558	-0.983165	1.83571
O	0.896009	0.984368	1.9863
O	2.32757	0.443835	-0.535528
C	1.17109	0.541644	-1.35187
O	0.727693	2.67601	-0.26064
H	1.30427	2.32591	0.440456
H	1.38985	0.533278	-2.41911
C	-0.969258	1.01604	-0.085198
H	-1.58298	1.66895	0.527012
O	-1.61262	-0.003778	-0.746278
H	-0.771927	-0.161395	2.03139
N	-2.8096	-0.475053	-0.151273
O	-3.17465	0.075074	0.850585
O	-3.28509	-1.38319	-0.760959
C	2.03638	-1.88127	-1.35027
H	2.5956	-1.5401	-2.22391
H	2.70264	-2.45165	-0.699477
H	1.22611	-2.538	-1.68148
PTH-1-1-2	X	Y	Z
C	-1.77793	-0.721552	0.197091	-852.893	0.18583
C	0.5077	1.68496	-0.697804
C	1.26841	0.741917	0.223252
C	0.955259	-0.753476	0.064024
H	-2.38539	-1.42457	0.784883
H	1.02698	1.03634	1.25265
O	2.64942	1.01267	0.066414
H	2.94226	0.730738	-0.809562
O	-0.640966	1.56557	-1.0495
O	0.319989	-1.15283	-1.14916
C	-0.39423	-1.3644	0.064848
O	-2.43075	-0.602545	-1.03485
H	-1.86399	-0.061895	-1.60449
H	-0.396576	-2.41435	0.358472
C	-1.83686	0.567176	1.00554
H	-2.62925	1.26962	0.682945
O	-1.13533	0.785058	1.96556
H	1.11654	2.54883	-1.03048
C	2.09923	-1.64473	0.5006
H	1.79403	-2.69082	0.441145
H	2.97579	-1.50708	-0.136177
H	2.3912	-1.40954	1.52762
TSTN-1-1-3	X	Y	Z	*
C	0.184433	1.61892	-0.717072	-853.493	0.181078
C	0.036885	0.027053	1.15584
C	0.781388	-1.15302	0.525053
C	1.63819	-0.588066	-0.614792
H	-0.390225	1.98536	-1.57262
H	0.080777	-1.88097	0.101922
O	1.57201	-1.79768	1.47632
H	1.8142	-1.1387	2.14662
O	0.428775	0.516234	2.20602
O	2.36457	0.580816	-0.238326
C	1.32674	0.73232	-1.20568
O	0.677714	2.73363	-0.032987
H	1.38016	2.43667	0.566408
H	1.68787	0.935273	-2.21286
C	-0.804439	0.833858	0.18114
H	-1.48213	1.51964	0.689102
O	-1.49776	-0.032558	-0.729427
H	-1.28929	-1.06011	1.8258
N	-2.78152	-0.427677	-0.341849
O	-3.23303	0.045032	0.668427
O	-3.26745	-1.20774	-1.1055
C	2.41708	-1.61795	-1.38771
H	3.01128	-2.22046	-0.696656
H	1.73432	-2.27691	-1.93179
H	3.08339	-1.12661	-2.09983
PTH-1-1-3	X	Y	Z	*
C	0.417394	1.74661	-0.568975	-853.003	0.178908
C	-0.101542	0.013676	1.12246
C	0.500778	-1.19132	0.415282
C	1.50581	-0.66532	-0.614076
H	-0.03992	2.27607	-1.40977
H	-0.283857	-1.74694	-0.117375
O	1.12715	-2.04668	1.32223
H	1.215	-1.57036	2.16317
O	0.074718	0.211338	2.2996
O	2.36991	0.339508	-0.081356
C	1.43702	0.735919	-1.08571
O	1.03383	2.70197	0.24624
H	1.69302	2.25165	0.796292
H	1.8927	0.969631	-2.04683
C	-0.72486	1.04475	0.201863
H	-1.3228	1.76662	0.761618
O	-1.48827	0.424866	-0.844778
N	-2.60535	-0.282882	-0.405498
O	-2.78662	-0.33658	0.784541
O	-3.23737	-0.760315	-1.30042
C	2.181	-1.72761	-1.43807
H	2.62889	-2.46987	-0.773022
H	1.45176	-2.22651	-2.08285
H	2.96239	-1.28318	-2.05788
TSTN-1-1-4	X	Y	Z
C	-0.261749	1.24802	-0.537452	-853.485	0.184726
C	0.364891	-1.31817	-0.397349
C	1.83616	-0.928628	-0.583768
C	2.18959	0.476451	-0.114067
H	-0.347377	1.40807	-1.62162
H	2.08621	-0.987588	-1.6503
O	2.63797	-1.89237	0.059577
H	2.29785	-1.9877	0.962446
O	0.097946	-1.67505	0.965292
O	1.56542	0.900668	1.10258
C	1.15746	1.52577	-0.110927
O	-1.18988	2.13689	0.034869
H	-1.19402	2.01623	0.994917
H	1.46246	2.5669	-0.217669
C	-0.634169	-0.200751	-0.271113
H	-0.577836	-0.568749	0.994418
O	-1.87887	-0.561034	-0.794438
H	0.073413	-2.11947	-1.08167
N	-2.99739	-0.248102	0.026209
O	-2.78613	0.023162	1.17559
O	-4.02516	-0.340294	-0.568782
C	3.64535	0.843816	-0.242124
H	4.25656	0.126906	0.310502
H	3.95519	0.822382	-1.29121
H	3.81377	1.84492	0.16004
IMTN-1-1-4	X	Y	Z
C	-0.235501	1.38397	-0.72761	-853.556	0.189487
C	0.273753	-1.22259	-0.463099
C	1.75293	-0.856511	-0.659096
C	2.09852	0.466099	0.01376
H	-0.1594	1.74996	-1.76241
H	1.95993	-0.74754	-1.7323
O	2.56296	-1.9071	-0.192451
H	2.10982	-2.29764	0.570856
O	0.078061	-1.76483	0.840924
O	1.28116	0.80036	1.14969
C	1.10922	1.55209	-0.055974
O	-1.21237	2.21125	-0.130949
H	-1.30312	1.95862	0.798773
H	1.45329	2.58379	0.007484
C	-0.634055	-0.066971	-0.730967
H	0.114478	-1.02674	1.46996
O	-1.94166	-0.364546	-0.9803
H	0.020024	-2.0412	-1.1456
N	-2.81666	-0.300985	0.183981
O	-2.30635	-0.006509	1.23097
O	-3.94214	-0.562315	-0.084764
C	3.56398	0.770338	0.164232
H	4.04197	-0.003767	0.767747
H	4.0483	0.77992	-0.816883
H	3.70104	1.74245	0.642035
TSTN-1-1-5	X	Y	Z
C	0.287352	1.63035	-0.764854	-853.492	0.185019
C	-0.116778	0.012932	1.09024
C	0.62868	-1.16798	0.498533
C	1.57871	-0.667887	-0.592044
H	-0.215136	2.02465	-1.65334
H	-0.078127	-1.87415	0.048323
O	1.33814	-1.86194	1.48818
H	1.76263	-1.20103	2.05627
O	0.439776	0.607022	2.19906
O	2.35934	0.447737	-0.158584
C	1.39396	0.673233	-1.18596
O	0.81816	2.72511	-0.069044
H	1.45542	2.39062	0.581114
H	1.83157	0.856594	-2.16628
C	-0.78252	0.930751	0.101119
H	-1.40586	1.68309	0.58808
O	-1.54569	0.156393	-0.843043
H	-0.572336	-0.071564	2.27293
N	-2.71975	-0.393409	-0.336491
O	-3.04568	-0.081186	0.780564
O	-3.26426	-1.12203	-1.11354
C	2.32994	-1.74258	-1.33119
H	3.05904	-1.29478	-2.00962
H	2.85168	-2.38322	-0.616105
H	1.63509	-2.35816	-1.90986
IMTN-1-1-5	X	Y	Z
C	0.251348	1.51066	-0.945317	-853.554	0.189822
C	-0.144034	0.108149	1.0954
C	0.685489	-1.07298	0.66067
C	1.58984	-0.720365	-0.52516
H	-0.254436	1.84795	-1.85541
H	0.015477	-1.87554	0.326551
O	1.45097	-1.59968	1.71484
H	1.82083	-0.859721	2.21568
O	0.423282	0.816824	2.11416
O	2.37831	0.45226	-0.308979
C	1.35177	0.516169	-1.30025
O	0.796933	2.64201	-0.310376
H	1.55401	2.33635	0.213958
H	1.72805	0.558942	-2.32126
C	-0.797681	0.888534	-0.001513
H	-1.44527	1.687	0.373162
O	-1.55093	-0.011525	-0.836648
H	-0.118625	1.58152	2.34814
N	-2.74764	-0.456823	-0.280151
O	-3.14508	0.098508	0.711058
O	-3.24278	-1.35302	-0.90031
C	2.32069	-1.88324	-1.14072
H	3.02535	-1.53004	-1.89672
H	2.86813	-2.42242	-0.363644
H	1.60966	-2.57081	-1.60797
TSTN-1-O2-s	X	Y	Z
C	-0.198438	-1.44544	0.343	-1002.99	0.195054
C	0.818994	0.871006	0.723204
C	0.134644	1.46714	-0.506364
C	-1.24697	0.787523	-0.321699
H	0.091456	-2.40305	-0.097073
H	0.60947	1.1996	-1.45179
O	0.073529	2.86154	-0.428958
H	-0.286353	3.10409	0.436805
O	-0.155333	1.0905	1.74
O	-1.46551	0.989131	1.09416
C	-1.09214	-0.680932	-0.600066
O	-0.801952	-1.74923	1.57978
H	-1.24857	-0.960639	1.91961
H	-1.16487	-1.00473	-1.63376
C	1.10004	-0.631405	0.581562
H	1.60977	-1.02758	1.46263
O	1.89425	-0.867826	-0.600284
H	1.70598	1.43449	1.02301
O	-3.04312	-1.49737	-0.114753
O	-3.82759	-1.47774	-1.04354
C	-2.39411	1.45536	-1.05639
H	-2.35005	2.53559	-0.916159
H	-2.32299	1.23288	-2.12453
H	-3.34951	1.07852	-0.687317
N	3.24317	-0.552072	-0.485027
O	3.62654	-0.117866	0.572435
O	3.85811	-0.764171	-1.48829
RCTN-1-O2-s	X	Y	Z
C	-0.118255	-1.48483	-0.154776	-1002.99	0.194538
C	0.836579	0.666571	0.833721
C	0.299371	1.52896	-0.306069
C	-1.09121	0.868404	-0.429356
H	0.221019	-2.31819	-0.775768
H	0.87877	1.45596	-1.22763
O	0.23329	2.87671	0.064757
H	-0.243969	2.93697	0.905176
O	-0.252076	0.67012	1.75822
O	-1.47837	0.8138	0.97366
C	-0.942977	-0.524916	-0.955717
O	-0.84832	-2.07488	0.909616
H	-1.28693	-1.37156	1.41051
H	-1.52118	-0.86188	-1.80808
C	1.13616	-0.774765	0.401244
H	1.54289	-1.36081	1.22816
O	2.0681	-0.770607	-0.702237
H	1.68033	1.13226	1.34875
O	-3.66812	-1.15391	0.163568
O	-4.54264	-1.1796	-0.65632
C	-2.13614	1.69634	-1.14963
H	-2.15338	2.71491	-0.7618
H	-1.89365	1.72735	-2.21539
H	-3.12389	1.24572	-1.02931
N	3.39142	-0.52371	-0.363171
O	3.64598	-0.335857	0.800883
O	4.12451	-0.531952	-1.30827
IMTN-1-O2-s	X	Y	Z
C	-0.159678	-1.38894	0.670693	-1003.04	0.199456
C	0.690766	1.01843	0.627256
C	-0.087437	1.36406	-0.64031
C	-1.40045	0.63903	-0.284852
H	0.176356	-2.38978	0.383847
H	0.367976	0.985867	-1.55746
O	-0.248533	2.74536	-0.779663
H	-0.579574	3.10333	0.057074
O	-0.256742	1.32082	1.64737
O	-1.57961	1.02216	1.09202
C	-1.15415	-0.87993	-0.384628
O	-0.715247	-1.51843	1.94899
H	-1.17384	-0.702924	2.19625
H	-0.797598	-1.11923	-1.39261
C	1.07559	-0.465552	0.695168
H	1.65452	-0.68505	1.59442
O	1.82542	-0.829806	-0.48231
H	1.54361	1.68078	0.794763
O	-2.37946	-1.61082	-0.188583
O	-3.00791	-1.81418	-1.31493
C	-2.62505	1.10262	-1.04822
H	-2.67525	2.19122	-1.03884
H	-2.56667	0.752055	-2.082
H	-3.53026	0.689347	-0.598925
N	3.15725	-0.420166	-0.490539
O	3.55609	0.188018	0.470464
O	3.7363	-0.740968	-1.48503
TSTN-1-O2-a	X	Y	Z
C	0.081171	0.788442	1.45306	-1002.99	0.195206
C	0.054676	-1.35454	0.094258
C	0.738561	-0.701556	-1.10333
C	1.81639	0.081846	-0.332667
H	-0.564622	1.66328	1.60302
H	0.076878	-0.058337	-1.68468
O	1.28735	-1.65652	-1.96748
H	1.88267	-2.22438	-1.45684
O	1.15525	-1.76749	0.918794
O	2.31689	-0.969873	0.533147
C	1.20395	1.14656	0.528638
O	0.571839	0.445247	2.73831
H	1.17995	-0.302642	2.64174
H	1.834	1.97617	0.836614
C	-0.789312	-0.354082	0.892589
H	-1.3053	-0.841288	1.72257
O	-1.75337	0.286857	0.032396
H	-0.498895	-2.25582	-0.17839
O	0.09449	2.36618	-0.951793
O	-0.727117	3.08626	-0.423108
C	2.98519	0.576672	-1.15841
H	3.3762	-0.218599	-1.79321
H	2.64667	1.4017	-1.79141
H	3.77854	0.942578	-0.501622
N	-2.8638	-0.48468	-0.289067
O	-3.63704	0.085191	-1.00065
O	-2.92118	-1.59959	0.167983
RCTN-1-O2-a	X	Y	Z
C	0.130457	0.406458	1.6444	-1002.99	0.194332
C	0.328536	-1.33633	-0.20231
C	0.854357	-0.321621	-1.21503
C	1.83003	0.421788	-0.282146
H	-0.633413	1.0713	2.06072
H	0.082304	0.333363	-1.62202
O	1.49914	-0.953918	-2.28442
H	2.17702	-1.54477	-1.92526
O	1.52422	-1.78849	0.440563
O	2.50788	-0.711517	0.332916
C	1.07838	1.17035	0.773492
O	0.793804	-0.161256	2.76457
H	1.55293	-0.669783	2.44334
H	1.44288	2.13325	1.11507
C	-0.59221	-0.69644	0.84511
H	-0.984244	-1.44169	1.5401
O	-1.68421	-0.016892	0.188479
H	-0.120593	-2.21139	-0.678424
O	-0.896718	2.68837	-0.694928
O	-1.74314	2.99743	0.095569
C	2.89087	1.24982	-0.977368
H	3.38892	0.670253	-1.75482
H	2.41458	2.1213	-1.43554
H	3.63056	1.59723	-0.25166
N	-2.69433	-0.836045	-0.29554
O	-3.56535	-0.226356	-0.844122
O	-2.58727	-2.02373	-0.116081
IMTN-1-O2-a	X	Y	Z
C	0.110237	1.06086	1.21698	-1003.04	0.199379
C	-0.219361	-1.29579	0.323632
C	0.552508	-1.01106	-0.961096
C	1.71446	-0.214144	-0.341735
H	-0.412209	2.0222	1.23192
H	-0.015354	-0.43313	-1.69186
O	0.979498	-2.19258	-1.57758
H	1.43773	-2.73711	-0.921431
O	0.813739	-1.7008	1.22497
O	2.03839	-1.01355	0.806647
C	1.22211	1.15506	0.159114
O	0.643836	0.876139	2.50198
H	1.12731	0.038565	2.53627
H	2.04869	1.7424	0.571771
C	-0.910406	-0.044575	0.881004
H	-1.4843	-0.27799	1.78065
O	-1.77434	0.531177	-0.117554
H	-0.898041	-2.1466	0.22876
O	0.732498	1.84085	-1.01794
O	0.508945	3.10363	-0.782851
C	2.96406	-0.102111	-1.19075
H	3.24607	-1.07742	-1.5876
H	2.7717	0.579575	-2.02335
H	3.78596	0.298271	-0.591254
N	-2.98238	-0.134685	-0.307404
O	-3.67113	0.378089	-1.13749
O	-3.188	-1.11737	0.361705
TSTN-1-O2-4	X	Y	Z
C	-0.142504	-1.1974	1.0702	-1003.73	0.193088
C	0.483489	1.19793	0.430389
C	-0.342763	1.17376	-0.856173
C	-1.59301	0.462424	-0.288959
H	0.255965	-2.209	0.957771
H	0.117381	0.611348	-1.67093
O	-0.616388	2.46446	-1.31465
H	-0.972833	2.98513	-0.580224
O	-0.469434	1.64442	1.39447
O	-1.77667	1.14222	0.96221
C	-1.20026	-0.982638	-0.005337
O	-0.64488	-1.08865	2.37473
H	-1.08389	-0.232955	2.48359
H	-2.24417	-1.7623	0.236225
C	1.01006	-0.187687	0.835574
H	1.61458	-0.130772	1.74387
O	1.77739	-0.756433	-0.240661
O	-1.02233	-1.73624	-1.15705
O	-2.18865	-2.54042	-0.773316
H	1.27303	1.95276	0.406613
C	-2.86103	0.599281	-1.10376
H	-2.79049	-0.050296	-1.97936
H	-3.72208	0.288527	-0.507158
H	-2.99249	1.63264	-1.42538
N	3.06061	-0.235534	-0.3934
O	3.40091	0.636764	0.367245
O	3.66465	-0.744924	-1.28832
IMTN-1-O2-4	X	Y	Z
C	0.176967	1.48212	0.172416	-1003.79	0.197442
C	-0.658485	-0.835693	0.788877
C	0.006385	-1.48735	-0.421887
C	1.36182	-0.75879	-0.346844
H	-0.156132	2.3659	-0.378808
H	-0.518835	-1.30118	-1.3605
O	0.125477	-2.87058	-0.256077
H	0.600797	-3.04122	0.57005
O	0.375975	-0.867047	1.77696
O	1.65615	-0.899353	1.06946
C	1.15987	0.701384	-0.653286
O	0.827101	1.97955	1.33995
H	1.10468	1.22314	1.88122
H	2.94074	2.17096	0.333554
C	-1.04769	0.627677	0.53742
H	-1.53968	1.06073	1.4114
O	-1.91172	0.723602	-0.611728
O	2.14323	1.41536	-1.22808
O	3.27623	1.4886	-0.27602
H	-1.48919	-1.42828	1.17928
C	2.49946	-1.39222	-1.11888
H	2.31764	-1.26139	-2.18853
H	3.43994	-0.901473	-0.864902
H	2.55658	-2.4569	-0.892775
N	-3.23368	0.345524	-0.39167
O	-3.53521	-0.001573	0.723003
O	-3.90858	0.422481	-1.37437
TSTN-1-O2-3	X	Y	Z
C	0.03618	-0.11358	-1.72315	-1003.74	0.193417
C	-0.351111	1.22922	0.388068
C	0.449523	0.277063	1.26143
C	1.64426	0.072544	0.311073
H	-0.414429	-0.944754	-2.27274
H	-0.073598	-0.649176	1.49377
O	0.849736	0.870454	2.46528
H	1.30642	1.70044	2.26576
O	0.653195	2.11026	-0.143707
O	1.95025	1.43307	-0.019545
C	1.29188	-0.654952	-1.00246
O	0.39724	0.855526	-2.67972
H	0.758904	1.62884	-2.22309
H	2.12279	-0.483478	-1.69816
C	-1.01988	0.475454	-0.771978
H	-1.6816	1.12738	-1.34649
O	-1.76508	-0.653787	-0.279706
H	-1.04791	1.84668	0.958744
O	1.24958	-2.0788	-0.820487
O	1.27129	-2.43352	0.525328
C	2.81202	-0.611164	0.96204
H	2.21588	-1.85103	0.918732
H	3.70933	-0.714123	0.353032
H	2.96408	-0.399882	2.01803
N	-2.9857	-0.337997	0.308813
O	-3.28361	0.829385	0.378488
O	-3.58975	-1.30039	0.676643
IMTN-1-O2-3	X	Y	Z
C	0.117043	0.930517	1.36521	-1003.77	0.196854
C	-0.212705	-1.27777	0.141475
C	0.592314	-0.827202	-1.06845
C	1.75424	-0.134462	-0.325515
H	-0.389808	1.89531	1.45847
H	0.047333	-0.153519	-1.72665
O	1.04122	-1.92177	-1.82039
H	1.47899	-2.54514	-1.22253
O	0.788707	-1.82475	1.00365
O	2.04658	-1.14171	0.689008
C	1.35502	1.13354	0.456947
O	0.525933	0.55926	2.66513
H	0.981896	-0.293996	2.6189
H	2.18715	1.36672	1.13172
C	-0.900876	-0.108949	0.851613
H	-1.47386	-0.462661	1.71133
O	-1.78249	0.57652	-0.057047
H	-0.903662	-2.09182	-0.091721
O	1.29435	2.2966	-0.337359
O	0.192621	2.14983	-1.24246
C	2.97161	0.065393	-1.14044
H	0.567498	2.54964	-2.04082
H	3.65037	0.875327	-0.906911
H	3.2173	-0.647982	-1.91518
N	-2.99937	-0.051884	-0.278426
O	-3.19939	-1.10568	0.275517
O	-3.71098	0.559827	-1.02013
TSTN-1-O2-2	X	Y	Z
C	0.061417	1.277	0.850819	-1003.75	0.193484
C	-0.13564	-1.20551	0.53074
C	0.677589	-1.17493	-0.760737
C	1.81193	-0.258959	-0.277993
H	-0.368142	2.27779	0.124663
H	0.136162	-0.761955	-1.61317
O	1.13468	-2.45427	-1.1022
H	1.58243	-2.8345	-0.332558
O	0.858745	-1.36441	1.53776
O	2.10073	-0.795162	1.01546
C	1.29479	1.17199	-0.079008
O	0.291018	1.58323	2.15805
H	1.05877	2.16449	2.24416
H	2.09508	1.81925	0.313858
C	-0.904651	0.103681	0.779605
H	-1.46751	0.052842	1.71374
O	-1.79235	0.374223	-0.321418
H	-0.793138	-2.07662	0.591791
O	0.8083	1.66417	-1.30981
O	0.097269	2.81081	-0.963172
C	3.08373	-0.299343	-1.10091
H	2.90339	0.187482	-2.0629
H	3.88337	0.234168	-0.580527
H	3.39062	-1.331	-1.27485
N	-2.98534	-0.342059	-0.296868
O	-3.15503	-1.11457	0.614397
O	-3.7007	-0.08166	-1.21673
IMTN-1-O2-2	X	Y	Z
C	0.048946	1.05173	0.930712	-1003.8	0.198294
C	-0.25504	-1.33545	0.3766
C	0.701582	-1.16618	-0.800336
C	1.82046	-0.413879	-0.060331
H	0.140001	3.11268	-1.24408
H	0.283996	-0.590937	-1.62858
O	1.12284	-2.4066	-1.29615
H	1.43658	-2.94081	-0.551991
O	0.609749	-1.75058	1.4263
O	1.9084	-1.13122	1.17387
C	1.37286	1.03026	0.258056
O	-0.377076	2.14334	1.59679
H	0.209231	2.88974	1.40413
H	2.1319	1.50841	0.895306
C	-0.944183	-0.025532	0.764752
H	-1.55582	-0.145679	1.66261
O	-1.82767	0.400085	-0.334945
H	-0.975474	-2.14255	0.224039
O	1.36594	1.71263	-1.01027
O	0.971103	3.0576	-0.746628
C	3.18762	-0.457915	-0.713812
H	3.17244	0.122993	-1.63805
H	3.93338	-0.027645	-0.040071
H	3.45939	-1.48887	-0.940329
N	-3.06772	-0.218722	-0.377395
O	-3.29137	-1.08635	0.432295
O	-3.77629	0.203044	-1.24565
TSTN-1-O2-1	X	Y	Z
C	-0.043224	-1.56556	0.445414	-1003.75	0.193375
C	0.20768	1.00347	0.623905
C	-0.808754	1.11349	-0.502161
C	-1.87243	0.174542	0.032889
H	0.487724	-2.33509	-0.122277
H	-0.376889	0.411896	-1.56193
O	-1.28084	2.35661	-0.827374
H	-0.55179	2.95985	-1.02002
O	-0.607885	1.09207	1.78455
O	-1.80271	0.328256	1.47054
C	-1.37144	-1.25928	-0.287904
O	-0.328103	-2.11137	1.71481
H	-0.875359	-1.47904	2.20376
H	-2.11175	-2.00136	0.026685
C	0.919068	-0.356461	0.617338
H	1.43162	-0.490369	1.57188
O	1.88785	-0.40584	-0.446365
H	0.917897	1.83273	0.688818
O	-1.29768	-1.385	-1.69494
O	-0.205009	-0.641557	-2.13247
C	-3.28784	0.444852	-0.42286
H	-3.97716	-0.212747	0.113028
H	-3.55147	1.48432	-0.224529
H	-3.36825	0.245234	-1.49411
N	3.10103	0.206309	-0.15668
O	3.20127	0.797008	0.892463
O	3.90933	0.071092	-1.02676
IMTN-1-O2-1	X	Y	Z
C	0.130597	1.00796	1.26828	-1003.78	0.198045
C	-0.23639	-1.26511	0.156741
C	0.639448	-0.827435	-0.972148
C	1.80455	-0.240152	-0.238017
H	-0.359469	1.98559	1.26088
H	0.395063	1.73963	-2.10067
O	0.924399	-1.64166	-2.01647
H	0.151526	-2.16491	-2.2648
O	0.688862	-1.8155	1.11156
O	1.97132	-1.1641	0.876535
C	1.40957	1.10882	0.397947
O	0.484258	0.738032	2.60857
H	0.961457	-0.104199	2.64044
H	2.22132	1.40984	1.07027
C	-0.906681	-0.052241	0.813177
H	-1.45709	-0.36513	1.70269
O	-1.81818	0.582389	-0.102689
H	-0.951533	-2.05792	-0.07956
O	1.37684	2.16635	-0.543053
O	0.138911	2.11765	-1.24511
C	3.11766	-0.189735	-0.987162
H	3.92059	0.095277	-0.302695
H	3.34043	-1.16451	-1.42217
H	3.05682	0.559708	-1.77967
N	-3.03525	-0.058792	-0.249651
O	-3.20035	-1.10667	0.330811
O	-3.78916	0.526696	-0.971412
TSTN-2-O2-s	X	Y	Z
C	-0.033641	0.967641	1.09624	-1002.99	0.194968
C	0.203155	-0.355018	-1.01641
C	-0.706496	-1.42486	-0.422168
C	-1.82578	-0.500729	0.078778
H	0.397653	1.48958	1.9456
H	-0.232539	-2.00016	0.377098
O	-1.13477	-2.33341	-1.39839
H	-1.51752	-1.83125	-2.13238
O	-0.703916	0.479043	-1.72373
O	-1.98212	0.4013	-1.02554
C	-1.36201	0.308204	1.31233
O	-1.34054	-0.500304	2.48372
H	-0.499163	-0.970673	2.54398
H	-2.12279	1.07663	1.50018
C	0.911817	0.477041	0.05626
H	1.4409	1.31751	-0.412667
O	1.87143	-0.346462	0.776539
H	0.906784	-0.753731	-1.75152
N	3.08867	-0.558331	0.126372
O	3.23731	-0.053753	-0.957424
O	3.8404	-1.23631	0.762226
O	0.164119	3.24778	-0.635879
O	-0.650893	2.79575	0.140588
C	-3.17064	-1.15723	0.315938
H	-3.11822	-1.77715	1.2128
H	-3.93252	-0.387783	0.467969
H	-3.44985	-1.77406	-0.538337
RCTN-2-O2-s	X	Y	Z
C	-0.066178	0.603748	1.38068	-1002.99	0.19394
C	0.223029	-0.056833	-1.01231
C	-0.562889	-1.33551	-0.740189
C	-1.73662	-0.707253	0.022713
H	0.233956	1.1472	2.2698
H	-0.011014	-2.06918	-0.148352
O	-0.949498	-1.95915	-1.93395
H	-1.41828	-1.30906	-2.477
O	-0.78364	0.848732	-1.44213
O	-2.01882	0.456822	-0.769956
C	-1.2939	-0.245583	1.42944
O	-1.11347	-1.36654	2.2948
H	-0.188889	-1.64548	2.27525
H	-2.12457	0.328889	1.8576
C	0.893661	0.498696	0.248518
H	1.37634	1.45693	0.032928
O	1.91761	-0.443115	0.708579
H	0.930215	-0.159602	-1.83922
N	3.12493	-0.40619	0.015721
O	3.2287	0.387921	-0.885896
O	3.92343	-1.19491	0.429043
O	-0.300875	3.57896	-0.251928
O	-1.08198	3.05818	0.493575
C	-3.00613	-1.53184	0.081874
H	-2.86062	-2.3622	0.775622
H	-3.82956	-0.911397	0.446533
H	-3.25957	-1.92049	-0.904673
IMTN-2-O2-s	X	Y	Z
C	-0.067681	1.406	0.587028	-1003.04	0.199184
C	0.107835	-0.468387	-1.11537
C	-0.646699	-1.45619	-0.228348
C	-1.74632	-0.49884	0.255301
H	0.511352	1.90297	1.37128
H	-0.048168	-1.87731	0.581019
O	-1.14794	-2.52625	-0.978632
H	-1.6587	-2.16437	-1.71774
O	-0.940537	0.16751	-1.83295
O	-2.11913	0.147908	-0.967309
C	-1.17725	0.561716	1.22641
O	-0.72331	-0.026187	2.42765
H	0.154812	-0.413063	2.30871
H	-1.99484	1.23697	1.50129
C	0.872573	0.584376	-0.303617
H	1.45199	1.25356	-0.943858
O	1.74193	-0.057054	0.65662
H	0.744158	-0.961804	-1.85431
N	2.92524	-0.588434	0.131875
O	3.12282	-0.433967	-1.04417
O	3.58964	-1.13556	0.959623
O	0.182313	3.32526	-0.588933
O	-0.693596	2.44287	-0.201182
C	-2.9872	-1.15573	0.823935
H	-2.76266	-1.53275	1.82447
H	-3.79123	-0.418635	0.898772
H	-3.3124	-1.9804	0.189513
TSTN-2-O2-a	X	Y	Z
C	-0.176421	1.11996	0.816345	-1002.99	0.194825
C	0.421894	-1.26218	0.705398
C	1.2239	-1.06866	-0.579154
C	1.91413	0.253375	-0.203418
H	-0.079902	1.60682	1.77961
H	0.614842	-0.982542	-1.47825
O	2.13666	-2.11807	-0.758019
H	2.65907	-2.20716	0.052265
O	1.37796	-0.96212	1.71936
O	2.323	0.000417	1.14595
C	0.873268	1.4092	-0.216499
O	0.37318	1.44576	-1.54156
H	-0.456055	1.93789	-1.56707
H	1.38873	2.34721	0.031919
C	-0.749352	-0.263679	0.828329
H	-1.32684	-0.458241	1.73359
O	-1.62576	-0.355563	-0.322794
H	0.108587	-2.29711	0.862174
N	-2.49644	-1.43597	-0.308439
O	-2.42225	-2.20425	0.619686
O	-3.22777	-1.45788	-1.25415
O	-1.82194	2.4476	0.217233
O	-1.57658	3.61313	0.461079
C	3.14919	0.603223	-1.0065
H	3.81161	-0.259288	-1.08594
H	2.84125	0.917682	-2.00637
H	3.68224	1.42692	-0.524151
RCTN-2-O2-a	X	Y	Z
C	-0.215394	0.892296	1.08674	-1002.99	0.193403
C	0.799186	-1.2733	0.406096
C	1.46345	-0.597357	-0.788479
C	2.00139	0.64236	-0.059615
H	-0.818663	1.43701	1.8036
H	0.774056	-0.338042	-1.59274
O	2.48167	-1.4021	-1.32021
H	3.07516	-1.65543	-0.598511
O	1.77958	-1.14521	1.42968
O	2.51981	0.084904	1.15427
C	0.837641	1.59467	0.288248
O	0.339694	2.06349	-0.965566
H	-0.515289	2.49039	-0.835565
H	1.24659	2.43234	0.870364
C	-0.478413	-0.556933	0.860904
H	-0.883228	-1.03794	1.75423
O	-1.48963	-0.618044	-0.193711
H	0.639856	-2.34368	0.254309
N	-2.17558	-1.81969	-0.291068
O	-1.87299	-2.70607	0.470953
O	-3.01031	-1.81355	-1.14911
O	-2.75776	2.1006	-0.258994
O	-3.46211	2.76865	0.444073
C	3.1359	1.37014	-0.751777
H	3.9099	0.666267	-1.0585
H	2.7456	1.88537	-1.63191
H	3.56893	2.10889	-0.071694
IMTN-2-O2-a	X	Y	Z
C	-0.023913	1.28507	-0.653272	-1003.04	0.199435
C	-0.06264	-1.18746	-0.788838
C	-0.882558	-1.33386	0.490925
C	-1.85243	-0.164612	0.255501
H	-0.496765	1.44341	-1.62626
H	-0.303278	-1.21593	1.4066
O	-1.5314	-2.5747	0.530262
H	-2.0288	-2.68627	-0.292761
O	-1.06356	-0.991914	-1.78471
O	-2.19844	-0.339281	-1.12601
C	-1.11267	1.17985	0.419148
O	-0.590517	1.19954	1.72613
H	-0.099063	2.01734	1.87373
H	-1.82464	2.0013	0.260505
C	0.855868	0.043887	-0.756128
H	1.48088	0.094841	-1.65019
O	1.69837	0.024731	0.410025
H	0.4775	-2.09866	-1.05535
N	2.82355	-0.78515	0.294494
O	2.95374	-1.4199	-0.723756
O	3.52667	-0.743615	1.25891
O	0.840691	2.41169	-0.393216
O	0.191272	3.53764	-0.51828
C	-3.13231	-0.202665	1.06417
H	-3.5828	-1.19463	1.02343
H	-2.89883	0.046651	2.10187
H	-3.83981	0.533261	0.6731
TSTN-2-O2-1	X	Y	Z
C	-0.138425	1.4745	0.036094	-1003.75	0.193289
C	0.413914	-0.865445	-0.811351
C	-0.350147	-1.49801	0.350575
C	-1.6299	-0.640853	0.250583
H	0.301232	2.2199	0.715899
H	0.144231	-1.39612	1.31877
O	-0.58791	-2.85686	0.12135
H	-0.974026	-2.95451	-0.761479
O	-0.571633	-0.786374	-1.82757
O	-1.85414	-0.590769	-1.15975
C	-1.31045	0.762004	0.756664
O	-1.27226	0.771022	2.12371
H	-0.980835	1.63247	2.45218
H	-2.12923	1.64952	0.231301
C	0.949717	0.536508	-0.490896
H	1.41556	0.979335	-1.37571
O	1.89856	0.465995	0.5913
H	1.20597	-1.51534	-1.19314
N	3.17399	0.028829	0.236495
O	3.37083	-0.23024	-0.923367
O	3.91877	-0.025048	1.16895
O	-1.91404	2.65171	-0.542043
O	-0.74707	2.10329	-1.07018
C	-2.87023	-1.22599	0.897121
H	-2.74407	-1.24808	1.98098
H	-3.73776	-0.607618	0.652766
H	-3.03476	-2.23937	0.531046
IMTN-2-O2-1	X	Y	Z
C	-0.228384	1.38241	0.197715	-1003.79	0.19855
C	0.505722	-0.842955	-0.82139
C	-0.15898	-1.64342	0.293453
C	-1.49245	-0.876066	0.324583
H	0.161753	2.11388	0.919813
H	0.372726	-1.60589	1.24539
O	-0.310899	-2.9861	-0.072883
H	-0.774188	-3.01561	-0.922864
O	-0.526131	-0.739591	-1.79851
O	-1.80062	-0.836137	-1.09545
C	-1.25668	0.513606	0.829242
O	-2.24554	1.07356	1.56361
H	-2.18474	2.03811	1.50569
H	-2.52658	2.52003	-1.02552
C	0.935005	0.561174	-0.373645
H	1.38026	1.10933	-1.20723
O	1.88105	0.469378	0.710871
H	1.33372	-1.38122	-1.28986
N	3.18756	0.177433	0.331492
O	3.40819	0.022303	-0.843473
O	3.93681	0.119175	1.26096
O	-1.80306	2.90653	-0.507415
O	-0.701418	2.1205	-0.950063
C	-2.64156	-1.58647	1.01004
H	-2.47575	-1.58506	2.08983
H	-3.5798	-1.06712	0.807941
H	-2.70332	-2.61505	0.655209
TSTN-2-O2-2	X	Y	Z
C	-0.013147	1.43935	0.537418	-1003.74	0.192106
C	0.121233	-0.741528	-0.822562
C	-0.933069	-1.37983	0.096558
C	-1.93262	-0.211534	0.104699
H	0.531792	1.87821	1.38455
H	-0.560637	-1.62499	1.0927
O	-1.45341	-2.54259	-0.480529
H	-1.76301	-2.32748	-1.37262
O	-0.66771	-0.183791	-1.85954
O	-1.94768	0.187829	-1.26757
C	-1.39885	0.948225	0.975667
O	-1.33061	0.443237	2.29508
H	-1.24323	1.16679	2.92573
H	-2.10314	1.78771	0.889735
C	0.872601	0.352617	-0.092533
H	1.37751	1.28279	-0.922067
O	1.8037	-0.099046	0.84827
H	0.782187	-1.48	-1.28234
N	2.9726	-0.686808	0.300999
O	3.08865	-0.65812	-0.893915
O	3.69362	-1.12719	1.14099
O	1.11218	2.48122	-1.05999
O	-0.160935	2.38764	-0.508998
C	-3.3545	-0.57542	0.486983
H	-3.39379	-0.805054	1.55341
H	-4.01847	0.267796	0.277594
H	-3.68983	-1.44291	-0.081551
IMTN-2-O2-2	X	Y	Z
C	0.1516	1.36723	0.318601	-1003.78	0.196447
C	-0.054234	-1.16531	-0.011905
C	-1.45925	-1.20363	0.606321
C	-2.01928	0.037059	-0.108416
H	0.586766	2.0512	1.05985
H	-1.4643	-1.10726	1.69235
O	-2.13324	-2.37943	0.259136
H	-2.10144	-2.47128	-0.704517
O	-0.352414	-0.969971	-1.40153
O	-1.57845	-0.178892	-1.45314
C	-1.38509	1.33037	0.458395
O	-1.75157	1.37402	1.82367
H	-1.60045	2.25777	2.17711
H	-1.79294	2.18237	-0.102335
C	0.711375	-0.001977	0.514617
H	1.81746	1.05512	-1.86304
O	1.88949	-0.145963	1.16153
H	0.475978	-2.11627	0.075608
N	3.01518	-0.602269	0.316915
O	2.74477	-0.895416	-0.812793
O	4.0366	-0.636634	0.918676
O	1.7827	1.80376	-1.24393
O	0.386013	1.88372	-0.99083
C	-3.53181	0.138949	-0.142905
H	-3.89683	0.4063	0.850815
H	-3.83209	0.913236	-0.854298
H	-3.96948	-0.812934	-0.444518
TSTN-2-O2-3	X	Y	Z
C	-0.063849	1.41679	-0.032893	-1003.72	0.192491
C	0.085123	-0.896455	-0.919225
C	-0.754083	-1.44296	0.233708
C	-1.8192	-0.333868	0.270477
H	0.624875	2.40518	0.508787
H	-0.213902	-1.5339	1.17651
O	-1.29125	-2.69542	-0.091343
H	-1.73386	-2.62527	-0.949706
[truncated: 1,324 more rows]

## Sheet: Aerosol-phase reactions
Filename	Cartesian coordinates			Electronic properties
TEPOX-H+	X	Y	Z	E_elec_0K (Hartree)	ZPE (Hartree)
C	1.75725	0.016349	-0.540198	-648.41	0.190189
C	-0.118396	-1.55223	0.182337
C	-0.709481	-0.348742	0.914904
C	-0.675038	0.653884	-0.247346
H	2.66987	0.150825	-1.11074
H	-0.108875	-0.009184	1.75929
O	-1.99907	-0.622391	1.40431
H	-2.57023	-0.925068	0.681142
O	-0.853223	-1.56089	-1.03391
O	-0.991798	-0.159716	-1.4059
C	0.760041	1.16612	-0.479092
O	1.10419	2.08261	0.53279
H	1.82544	2.64796	0.220729
H	0.775481	1.6349	-1.46975
C	1.33458	-1.34688	-0.19658
H	1.91058	-2.19585	-0.547866
O	2.06045	-0.53778	0.819613
H	3.00255	-0.802489	0.921253
C	-1.68093	1.78092	-0.170015
H	-1.51053	2.36437	0.73727
H	-1.57552	2.43783	-1.03761
H	-2.69351	1.37461	-0.147317
H	-0.29782	-2.50902	0.674315
TEPOX	X	Y	Z
C	-1.81364	-0.106176	0.473998	-647.835	0.177856
C	0.182228	-1.54496	-0.206675
C	0.721585	-0.30665	-0.91085
C	0.593413	0.681701	0.25557
H	-2.69986	-0.043426	1.09967
H	0.124479	-0.007415	-1.77191
O	2.04479	-0.48596	-1.36547
H	2.6049	-0.770706	-0.627029
O	0.90466	-1.52468	1.02651
O	0.967694	-0.119754	1.40822
C	-0.880368	1.09091	0.482041
O	-1.31581	2.07619	-0.437354
H	-1.48033	1.65457	-1.29501
H	-0.923934	1.55228	1.4733
C	-1.29752	-1.43044	0.094567
H	-1.79118	-2.32503	0.464478
O	-2.06232	-0.654621	-0.826897
H	0.452988	-2.48107	-0.699945
C	1.52108	1.87681	0.203062
H	1.31344	2.46569	-0.693259
H	1.36532	2.51022	1.08096
H	2.56144	1.54832	0.178399
TSTX-H2O	X	Y	Z
C	-1.61422	0.288273	-0.199879	-724.777	0.213778
C	0.16458	-1.47594	-0.511992
C	1.17019	-0.365813	-0.812086
C	0.844521	0.550576	0.373517
H	-2.63943	0.630388	-0.270935
H	1.00081	0.128877	-1.76778
O	2.49344	-0.844078	-0.812953
H	2.68138	-1.28612	0.029445
O	0.348268	-1.69517	0.88297
O	0.652253	-0.387318	1.45905
C	-0.503672	1.27308	0.154688
O	-0.347694	2.24873	-0.848507
H	-1.02527	2.93069	-0.735986
H	-0.793732	1.73114	1.10644
C	-1.27109	-1.02529	-0.747901
H	-2.02274	-1.81049	-0.726117
O	-1.32566	-0.188709	-1.93308
H	0.390319	-2.41776	-1.01536
H	-2.19573	-0.267219	-2.36789
O	-2.12816	-0.144118	1.85018
H	-1.295	-0.380513	2.29017
H	-2.65186	-0.959525	1.83363
C	1.94063	1.51145	0.779459
H	2.16236	2.18389	-0.051913
H	1.62021	2.10628	1.63888
H	2.84344	0.957669	1.04129
RCTX-H2O	X	Y	Z
C	1.39728	0.898699	0.273459	-724.786	0.214062
C	-0.060454	-0.937224	1.27551
C	-1.2584	-0.102171	0.82325
C	-0.838239	0.115136	-0.636726
H	2.39623	1.26067	0.055771
H	-1.36381	0.841371	1.35923
O	-2.46433	-0.808815	0.974579
H	-2.41176	-1.65294	0.499387
O	0.055946	-1.89151	0.228206
O	-0.228432	-1.15364	-0.996148
C	0.286423	1.16869	-0.733051
O	-0.256215	2.45498	-0.551603
H	0.305686	3.10557	-0.996108
H	0.741565	1.05737	-1.72437
C	1.22913	-0.142651	1.29148
H	2.10133	-0.565393	1.77854
O	0.989886	1.27821	1.66973
H	-0.228146	-1.49283	2.19912
H	1.73192	1.66042	2.18989
O	2.6631	-1.24718	-1.5335
H	1.69542	-1.30635	-1.55242
H	2.91489	-1.64076	-0.687679
C	-1.96333	0.385448	-1.6113
H	-2.4943	1.2931	-1.31724
H	-1.56075	0.520019	-2.61863
H	-2.66241	-0.452192	-1.61122
IMTX-H2O	X	Y	Z
C	-1.55689	0.575523	0.120217	-724.824	0.218711
C	-0.062209	-1.47961	0.098338
C	1.0007	-0.725384	-0.687674
C	0.971932	0.593022	0.098711
H	-2.44264	0.996996	-0.356833
H	0.726021	-0.571572	-1.73098
O	2.25061	-1.37469	-0.670424
H	2.51658	-1.54542	0.246165
O	0.31914	-1.22839	1.45161
O	0.793835	0.153381	1.47733
C	-0.303037	1.38045	-0.262047
O	-0.290281	1.62235	-1.65117
H	-0.920456	2.32854	-1.85354
H	-0.308331	2.31959	0.305032
C	-1.46855	-0.936023	-0.163013
H	-2.18118	-1.46004	0.485189
O	-1.7463	-1.17059	-1.52782
H	-0.017408	-2.56213	-0.038809
H	-2.70234	-1.11492	-1.66974
O	-1.77414	0.826375	1.56616
H	-0.962423	0.619375	2.09261
H	-2.55135	0.360092	1.9406
C	2.22384	1.43559	0.028686
H	2.36531	1.78277	-0.998172
H	2.1254	2.30554	0.683111
H	3.09514	0.852296	0.330585
TSTX-NO3-	X	Y	Z
C	0.549554	-1.11554	-0.021565	-928.593	0.204395
C	-0.712721	0.510328	-1.47786
C	-1.99749	0.135321	-0.740219
C	-1.467	0.264869	0.692158
H	1.33861	-1.83932	0.13829
H	-2.3493	-0.871522	-0.960535
O	-3.04956	1.02308	-1.03676
H	-2.77772	1.9329	-0.838963
O	-0.256735	1.65474	-0.762719
O	-0.681883	1.47174	0.622629
C	-0.50681	-0.901006	1.04202
O	-1.18852	-2.1229	1.22874
H	-1.44938	-2.1933	2.15789
H	0.037217	-0.613817	1.94864
C	0.343198	-0.581923	-1.3669
H	1.20283	-0.488359	-2.02533
O	-0.303058	-1.88389	-1.42343
H	0.302802	-2.54744	-1.80303
O	1.91857	0.324455	0.842364
O	3.85326	1.24506	0.586927
O	3.36712	-0.552872	-0.512967
N	3.06318	0.336202	0.295916
C	-2.51355	0.462872	1.76741
H	-3.15793	-0.418327	1.81549
H	-2.03207	0.602603	2.73919
H	-3.1244	1.33743	1.53927
H	-0.877659	0.820996	-2.51084
RCTX-NO3-	X	Y	Z
C	-0.418158	1.235	-0.425249	-928.599	0.206141
C	0.503556	-1.01448	-1.17931
C	1.87809	-0.490938	-0.765116
C	1.51502	-0.027589	0.650227
H	-1.27999	1.88139	-0.297452
H	2.23515	0.33207	-1.38463
O	2.85647	-1.50035	-0.807286
H	2.58761	-2.24373	-0.245531
O	0.086061	-1.7625	-0.043198
O	0.633945	-1.07219	1.11879
C	0.683265	1.27757	0.613768
O	1.46697	2.41924	0.344897
H	1.87527	2.71893	1.16975
H	0.175888	1.35821	1.58252
C	-0.507405	0.101357	-1.35247
H	-1.44172	-0.107772	-1.86485
O	0.132675	1.36073	-1.82427
H	-0.453637	1.88737	-2.412
O	-2.2107	0.061389	1.41105
O	-3.17245	-1.41628	0.156649
O	-3.55837	0.689241	-0.159415
N	-2.9877	-0.223934	0.474675
C	2.67019	0.07116	1.62392
H	3.39713	0.80035	1.25796
H	2.30842	0.392225	2.60478
H	3.16045	-0.89855	1.72199
H	0.525219	-1.69955	-2.0277
PTX-NO3-	X	Y	Z
C	-0.836142	0.249825	0.691774	-928.657	0.207815
C	0.734943	0.90778	-1.18061
C	1.95198	0.616057	-0.316162
C	1.49311	-0.726458	0.261474
H	-1.41314	0.690493	1.50736
H	2.10327	1.36183	0.463561
O	3.14523	0.537963	-1.06471
H	3.03699	-0.105392	-1.78174
O	0.467178	-0.349909	-1.80827
O	0.91751	-1.38613	-0.88372
C	0.36787	-0.490233	1.29613
O	0.827304	0.312962	2.36884
H	1.32397	-0.240005	2.98746
H	0.019285	-1.46409	1.65952
C	-0.475184	1.32983	-0.346789
H	-1.32624	1.48138	-1.02017
O	-0.127504	2.53555	0.305344
H	-0.932652	2.94395	0.655377
O	-1.6355	-0.787839	0.065494
O	-3.56993	-1.342	-0.684201
O	-3.35177	0.601202	0.251421
N	-2.9478	-0.470243	-0.129258
C	2.5862	-1.6261	0.79609
H	3.06098	-1.15298	1.66041
H	2.16222	-2.58408	1.10939
H	3.34552	-1.80068	0.032126
H	0.937553	1.62268	-1.98146
TSTX-HSO4-	X	Y	Z
C	0.205888	-1.49623	-0.238528	-1347.58	0.21741
C	1.68412	-0.344636	1.4455
C	2.49086	0.255044	0.294455
C	1.31925	0.770283	-0.54666
H	-0.373179	-2.34524	-0.580491
H	3.08546	-0.48126	-0.244599
O	3.36571	1.26818	0.728969
H	2.86744	1.9592	1.19224
O	0.724537	0.670684	1.73173
O	0.453772	1.34022	0.463866
C	0.558746	-0.398179	-1.21749
O	1.29836	-0.978278	-2.27011
H	1.03669	-0.555233	-3.10024
H	-0.395892	-0.007917	-1.58877
C	0.947169	-1.61077	1.01993
H	0.499246	-2.18413	1.82723
O	1.80935	-2.38748	0.154444
H	2.26819	-0.49565	2.35492
H	1.58143	-3.33354	0.21725
O	-2.67914	0.085591	-1.44027
O	-4.02818	-0.169783	0.620291
S	-2.70847	0.057814	0.030436
O	-2.31165	1.53468	0.539472
O	-1.65111	-0.836858	0.595329
H	-1.3354	1.64145	0.464629
C	1.64116	1.86805	-1.53595
H	2.34212	1.48808	-2.28297
H	0.728428	2.19578	-2.04159
H	2.0947	2.71645	-1.02191
RCTX-HSO4-	X	Y	Z
C	0.587513	1.68001	0.030294	-1347.59	0.219175
C	1.8394	0.078621	-1.49918
C	2.55972	-0.416214	-0.245062
C	1.32703	-0.681425	0.626632
H	-0.146904	2.46818	0.139275
H	3.2187	0.327827	0.202557
O	3.33678	-1.55786	-0.510014
H	2.78687	-2.24546	-0.917098
O	0.799921	-0.879815	-1.66725
O	0.393011	-1.25943	-0.320619
C	0.704077	0.643966	1.12733
O	1.44489	1.22283	2.17944
H	1.14022	0.851359	3.01958
H	-0.324034	0.418836	1.43456
C	1.16356	1.4189	-1.28895
H	0.80987	1.97184	-2.15225
O	1.93304	2.26728	-0.33278
H	2.44972	0.049705	-2.40238
H	1.86982	3.22675	-0.539054
O	-2.64899	-0.047402	1.44395
O	-4.27808	0.053265	-0.414214
S	-2.86419	-0.016298	-0.017294
O	-2.41229	-1.47442	-0.568382
O	-1.98713	0.956192	-0.699959
H	-1.44008	-1.55344	-0.463899
C	1.50987	-1.67972	1.74825
H	2.24914	-1.30121	2.45809
H	0.56104	-1.82973	2.27142
H	1.85643	-2.63379	1.34867
PTX-HSO4-	X	Y	Z
C	-0.269803	1.11004	0.439803	-1347.63	0.220363
C	1.67855	0.776623	-1.13945
C	2.43059	-0.077289	-0.127953
C	1.25983	-0.942529	0.342828
H	-0.69248	1.82333	1.15186
H	2.84863	0.509109	0.689286
O	3.48455	-0.812565	-0.707277
H	3.14234	-1.36145	-1.42955
O	0.889368	-0.184816	-1.85179
O	0.584001	-1.25018	-0.904403
C	0.299038	-0.096803	1.21175
O	0.975126	0.446656	2.32955
H	1.03875	-0.229335	3.01892
H	-0.516623	-0.743459	1.55431
C	0.773125	1.80633	-0.455802
H	0.236933	2.38035	-1.21872
O	1.61543	2.64117	0.311559
H	2.33289	1.24477	-1.87823
H	1.12993	3.44602	0.542068
O	-2.91599	0.095277	1.29989
O	-3.59265	0.162057	-1.10149
S	-2.59096	-0.10536	-0.096158
O	-2.06321	-1.58643	-0.272738
O	-1.3214	0.747398	-0.509479
H	-1.15772	-1.6013	-0.685796
C	1.61793	-2.26062	0.990509
H	2.13186	-2.06962	1.93707
H	0.708882	-2.83368	1.19478
H	2.27467	-2.84209	0.341837
